# Supplementary material for: Reprogrammed Transcriptome in Rhesus-Bovine Interspecies Somatic Cell Nuclear Transfer Embryos
Source: PLoS One. 2011 Jul 25;6(7):e22197. doi: 10.1371/journal.pone.0022197 (PMC3143123; doi:10.1371/journal.pone.0022197)
Supplement: Table S5 — Leaking expression of somatic specific genes in R/B iSCNT embryo. (XLS) [file pone.0022197.s006.xls]

## Sheet: Table S5
probe set	gene	Accession	EntrezGene	Description	R_IVF_R1	R_IVF_R2	R_IVF_R3	R_IVF_R4	iSCNT_R1	iSCNT_R2	iSCNT_R3	FC	LCB	R_PEF_R1	R_PEF_R2	R_PEF_R3	R_IVF_R1	R_IVF_R2	R_IVF_R3	R_IVF_R4	FC	LCB	Avg FC	Avg LCB
MmuSTS.3432.1.S1_at	LOC700359: similar to alpha 2 type I collagen	47776498	700359	MmuSTS.3432.1	5.58	4.03	11.11	5.75	266.01	230	166.81	33.61	7.24	7742.56	7251.6	7387.81	5.58	4.03	11.11	5.75	-1180	-743.97	606.805	375.605
Mmu.15501.1.S1_s_at	TAGLN: similar to Transgelin (Smooth muscle protein 22-alpha) (SM22-alpha) (WS3-10) (22 kDa actin-binding protein)	CO581709	697440	Mmu.15501.1	3.97	5.06	8.63	4.49	28.65	100.09	136.76	15.74	1.94	5077.32	5704.5	6026.74	3.97	5.06	8.63	4.49	-1056.07	-576.19	535.905	289.065
MmuSTS.3433.1.S1_at	COL3A1: collagen, type III, alpha 1 (Ehlers-Danlos syndrome type IV, autosomal dominant)	47776499	574131	MmuSTS.3433.1	7.01	5.91	8.71	7.13	35.78	47.71	33.62	5.37	2.74	5097.58	5114.19	3919.95	7.01	5.91	8.71	7.13	-670.84	-471.07	338.105	236.905
MmugDNA.43592.1.S1_at	MmugDNA.43592.1	gDNA.Hs.100554.0.A1		MmugDNA.43592.1	2.57	1.56	1.05	1.01	27.35	32.55	3.2	14.94	2.36	1980.22	2112.93	1633.01	2.57	1.56	1.05	1.01	-1352.79	-463.55	683.865	232.955
MmuSTS.1894.1.S1_at	LOC712076: similar to small inducible cytokine B14 precursor	49533147	712076	MmuSTS.1894.1	2.35	1	4.6	1	87.75	11.02	34.25	20.27	2.95	1957.84	2104.72	2344.14	2.35	1	4.6	1	-971.41	-374.74	495.84	188.845
MmugDNA.3198.1.S1_at	LOC713883: similar to plasminogen activator inhibitor-1	gDNA.Hs.82085.0.S1	713883	MmugDNA.3198.1	13.35	9.45	15.94	8.43	95.74	165.95	61.73	8.59	2.08	7265.49	5187.52	7459.1	13.35	9.45	15.94	8.43	-578.26	-356.45	293.425	179.265
MmugDNA.32051.1.S1_at	LOC703088: similar to transforming growth factor, beta receptor II isoform B precursor	gDNA.g1827474	703088	MmugDNA.32051.1	6.86	4.04	2.3	7.97	44.89	32.87	26.38	6.56	2.37	3184.63	2658.27	2615.93	6.86	4.04	2.3	7.97	-550.98	-355.33	278.77	178.85
MmugDNA.7729.1.S1_at	MmugDNA.7729.1	gDNA.g183115		MmugDNA.7729.1	3.31	9.92	7.4	3.09	119.92	68.84	72.78	16.2	6.85	5001.09	3716.49	5901.01	3.31	9.92	7.4	3.09	-831.51	-313.94	423.855	160.395
MmugDNA.19113.1.S1_at	LOC713883: similar to plasminogen activator inhibitor-1	gDNA.g10835158	713883	MmugDNA.19113.1	12.07	11.22	15.59	21.08	113.15	69.31	83.87	5.87	2.42	7410.64	5252.55	7146.4	12.07	11.22	15.59	21.08	-447.03	-267.02	226.45	134.72
MmugDNA.27267.1.S1_at	CTGF: connective tissue growth factor	gDNA.g180923	714520	MmugDNA.27267.1	18.86	7.7	8.27	6.78	97.29	27.26	152.63	9.35	2.45	4869.74	3731.34	4311.6	18.86	7.7	8.27	6.78	-440.6	-262.73	224.975	132.59
MmugDNA.776.1.S1_at	LOC707733: similar to peptidylglycine alpha-amidating monooxygenase isoform b, preproprotein	gDNA.g4505602	707733	MmugDNA.776.1	7.57	10.73	7.84	6.35	43.97	20.94	34.17	3.75	1.41	2599.51	3560.87	2610.47	7.57	10.73	7.84	6.35	-353.89	-247.99	178.82	124.7
MmugDNA.31542.1.S1_at	LOC719328: similar to colon carcinoma related protein	gDNA.Hs.30343.0.A1	719328	MmugDNA.31542.1	5.84	2.53	4.27	6.09	13.72	8.72	24.05	3.36	1.3	1484.92	2633.16	1590.61	5.84	2.53	4.27	6.09	-405.46	-201.7	204.41	101.5
Mmu.15008.1.S1_at	LOC698639: similar to AT rich interactive domain 5B (MRF1-like)	CN643929	698639	Mmu.15008.1	1	2.73	4.19	5.43	513.78	27.14	649.7	114.22	18.62	1257.69	1672.35	864.68	1	2.73	4.19	5.43	-365.65	-178.72	239.935	98.67
MmugDNA.34925.1.S1_at	MmugDNA.34925.1	gDNA.Hs.111779.1.S1		MmugDNA.34925.1	16.28	9.72	5	15.06	146.55	101.08	220.61	13.91	5.09	4421.96	3724.82	3546.41	16.28	9.72	5	15.06	-357.13	-184.98	185.52	95.035
MmugDNA.4045.1.S1_at	LOC705413: similar to thrombospondin 1 precursor	gDNA.Hs.87409.0.A2	705413	MmugDNA.4045.1	12.12	17.71	12.42	5.96	752.99	615.55	686.09	59.94	26.57	3627.34	3594.93	2787.86	12.12	17.71	12.42	5.96	-291.76	-150.33	175.85	88.45
MmugDNA.15738.1.S1_at	MmugDNA.15738.1	gDNA.g924281		MmugDNA.15738.1	2.31	5.55	3.84	6.31	110.46	19.15	49.5	13.75	1.61	2271.84	2276.03	669.97	2.31	5.55	3.84	6.31	-396.16	-168.4	204.955	85.005
MmugDNA.42888.1.S1_at	LOC696339: similar to insulin-like growth factor binding protein 5	gDNA.Hs.103391.0.A1	696339	MmugDNA.42888.1	3.44	5.18	9.6	4.98	31.29	40.81	19.28	4.91	1.8	2973.29	4794.5	1758.84	3.44	5.18	9.6	4.98	-497.88	-157.76	251.395	79.78
MmugDNA.31377.1.S1_s_at	LOC706568: similar to caspase 1 isoform alpha precursor	gDNA.g717045	706568	MmugDNA.31377.1	2.3	1	2.34	4.09	1140.06	261.1	1215.2	380.89	115.04	193.07	552.97	218.29	2.3	1	2.34	4.09	-134.71	-31.01	257.8	73.025
MmuSTS.2523.1.S1_at	MmuSTS.2523.1	49533279		MmuSTS.2523.1	6.39	9.84	7.63	13.59	436.84	138.82	406.95	35.99	15.55	1452.2	1596.57	1330.69	6.39	9.84	7.63	13.59	-161.34	-111.82	98.665	63.685
MmugDNA.16180.1.S1_at	LOC701100: similar to ubiquitin-conjugating enzyme E2, J1	gDNA.Hs.184325.0.A3	701100	MmugDNA.16180.1	5.59	1	2.28	1.75	9.97	8.13	10.82	4.25	1.24	834.15	760.79	570.49	5.59	1	2.28	1.75	-335.93	-124.74	170.09	62.99
MmugDNA.16351.1.S1_at	MmugDNA.16351.1	gDNA.Hs.260024.0.A3		MmugDNA.16351.1	14.47	3.16	4.29	2.32	57.71	32.47	41.54	8.12	1.74	1541.75	2380.37	990.58	14.47	3.16	4.29	2.32	-310.24	-120.44	159.18	61.09
MmugDNA.31572.1.S1_at	MmugDNA.31572.1	gDNA.Hs.289047.0.S1		MmugDNA.31572.1	6.98	4.39	4.7	4.9	23.11	32.81	27.74	5.72	2.84	1806.5	1188.59	977.53	6.98	4.39	4.7	4.9	-251.23	-118.66	128.475	60.75
MmugDNA.36067.1.S1_at	LOC719036: similar to T-cell death associated gene	gDNA.Hs.288850.0.S1	719036	MmugDNA.36067.1	4.19	11.53	5.72	4.99	75.78	92.32	38.52	10.62	2.54	2997.56	1260.23	1196.97	4.19	11.53	5.72	4.99	-304.65	-118.6	157.635	60.57
MmugDNA.24353.1.S1_at	LOC703781: similar to retinoic acid receptor responder (tazarotene induced) 1 isoform 1	gDNA.g4506424	703781	MmugDNA.24353.1	1.15	4.92	4.56	3.2	21	17.71	54.04	10.06	2.94	1034.37	1686.09	1109.39	1.15	4.92	4.56	3.2	-397.05	-117.44	203.555	60.19
MmugDNA.27099.1.S1_at	LOC693801: similar to methyl-CpG binding domain protein 2 isoform 1	gDNA.g3800792	693801	MmugDNA.27099.1	12.19	19.11	17	15.42	1690.99	610.25	970.88	66.11	29.9	1763.19	2097.07	1900.43	12.19	19.11	17	15.42	-119.07	-90.07	92.59	59.985
MmugDNA.10526.1.S1_at	ANXA1: annexin I	gDNA.g4502100	702946	MmugDNA.10526.1	13.98	23.01	23.1	44.06	227.61	226.75	188.78	8.26	2.04	5099.63	3761.57	5070.75	13.98	23.01	23.1	44.06	-180.82	-112.53	94.54	57.285
MmugDNA.18189.1.S1_at	LOC700963: similar to Insulin-like growth factor-binding protein 4 precursor (IGFBP-4) (IBP-4) (IGF-binding protein 4)	gDNA.g10835020	700963	MmugDNA.18189.1	24.77	22.34	34.78	22.21	120.03	108.29	225.95	5.9	2.21	5135.06	4893.81	3272.67	24.77	22.34	34.78	22.21	-173.28	-104.32	89.59	53.265
MmugDNA.40626.1.S1_at	LGR5: leucine-rich repeat-containing G protein-coupled receptor 5	gDNA.Hs.285529.1.A1	718661	MmugDNA.40626.1	1.35	5.04	7.11	7.49	34.41	15.17	34.74	5.35	2.86	1384.23	2407.55	1651.88	1.35	5.04	7.11	7.49	-328.61	-103	166.98	52.93
MmugDNA.38818.1.S1_at	LOC699977: similar to adipocyte enhancer binding protein 1 precursor	gDNA.g4755145	699977	MmugDNA.38818.1	12.3	9.86	11.48	12	171.03	169.27	118.47	13.21	6.71	1580.57	2509.69	1341.25	12.3	9.86	11.48	12	-159.51	-93.78	86.36	50.245
Mmu.11188.1.S1_at	LOC707050: similar to caldesmon 1 isoform 4	CO579623	707050	Mmu.11188.1	5.17	3.99	4.01	4.01	16.65	9.81	9.15	2.75	1.44	962.46	1246.1	644.27	5.17	3.99	4.01	4.01	-215.92	-97.76	109.335	49.6
MmugDNA.7787.1.S1_at	LOC708075: hypothetical protein LOC708075	gDNA.Hs.74111.2.S1	708075	MmugDNA.7787.1	1	1.77	1.22	1.04	140.78	205.48	45.89	116.76	29.22	153.12	165.49	162.83	1	1.77	1.22	1.04	-139.44	-56.73	128.1	42.975
MmugDNA.42327.1.S1_at	FBLN1: fibulin 1	gDNA.Hs.79732.0.S2	713606	MmugDNA.42327.1	12.94	14.46	7.08	11.6	1018.89	952.08	586.03	74.56	48.7	920.95	963.17	379.72	12.94	14.46	7.08	11.6	-65.51	-33.5	70.035	41.1
MmuSTS.2036.1.S1_at	LOC711667 /// PDGFRB: platelet-derived growth factor receptor beta /// hypothetical protein LOC711667	47776964	711353 /// 711667	MmuSTS.2036.1	2.32	1.65	1	1	698.77	276.27	306.76	279.62	78.97	34.33	47.01	27.14	2.32	1.65	1	1	-22.51	-1.7	151.065	40.335
MmugDNA.23639.1.S1_at	LOC699022: similar to insulin-like growth factor binding protein 6	gDNA.g11321592	699022	MmugDNA.23639.1	16.72	18.24	14.41	17.87	111.15	103.24	43.21	4.84	1.48	1511.64	2661.29	2404.07	16.72	18.24	14.41	17.87	-130.98	-78.96	67.91	40.22
MmugDNA.41246.1.S1_at	LOC701541: similar to fibroblast activation protein, alpha subunit	gDNA.g1924981	701541	MmugDNA.41246.1	10.56	15.01	9.15	10.99	2092.97	1329.55	1842.03	149.25	59.03	1070.17	1011.71	705.95	10.56	15.01	9.15	10.99	-77.89	-20.07	113.57	39.55
MmuSTS.1406.1.S1_at	KCNK1: potassium channel, subfamily K, member 1	47776813	718815	MmuSTS.1406.1	4.84	4.69	5.41	6.7	37.21	21.03	66.89	7.9	3.09	854.31	740.23	392.2	4.84	4.69	5.41	6.7	-124.58	-73.15	66.24	38.12
MmugDNA.30885.1.S1_at	LOC717346: similar to complement factor H isoform a precursor	gDNA.Hs.296941.0.S1	717346	MmugDNA.30885.1	1.64	5.52	4.72	3.19	34.15	32.19	15.35	7.02	2.27	449.06	1216.87	490.24	1.64	5.52	4.72	3.19	-194.51	-72.89	100.765	37.58
MmugDNA.39036.1.S1_at	COPZ2: similar to Coatomer subunit zeta-2 (Zeta-2 coat protein) (Zeta-2 COP)	gDNA.g7705982	696299	MmugDNA.39036.1	4.64	4.3	5.79	5.1	67.35	70.21	39.7	11.54	4.15	391.58	989.9	687.28	4.64	4.3	5.79	5.1	-139.27	-69.83	75.405	36.99
Mmu.4442.1.S1_s_at	LOC712675: similar to phosphofructokinase, platelet	CN643070	712675	Mmu.4442.1	14.62	10.82	7.05	14.51	516.06	50.41	379.53	26.71	6.72	878.1	1354.66	1129.52	14.62	10.82	7.05	14.51	-96.1	-67.06	61.405	36.89
MmugDNA.10052.1.S1_at	LOC704283: similar to CG9590-PA	gDNA.Hs.59622.0.S1	704283	MmugDNA.10052.1	1.95	3.7	2.79	6.36	167.26	129.82	70.48	35.34	11.68	304.7	425.41	362.59	1.95	3.7	2.79	6.36	-109.59	-59.25	72.465	35.465
MmuSTS.3408.1.S1_at	PRELP: proline arginine-rich end leucine-rich repeat protein	60301394	702702	MmuSTS.3408.1	6.41	5	5.09	8.02	51.85	21.17	35.81	5.42	1.72	631.05	680.94	423.38	6.41	5	5.09	8.02	-92.97	-60.09	49.195	30.905
MmugDNA.18166.1.S1_at	HIPK2: homeodomain interacting protein kinase 2	gDNA.Hs.75354.1.S3	716152	MmugDNA.18166.1	4.96	6.28	6.72	10.66	145.99	15.92	75.22	11.31	1.4	1069	782.02	612.95	4.96	6.28	6.72	10.66	-118.79	-59.59	65.05	30.495
MmugDNA.37086.1.S1_at	MmugDNA.37086.1	gDNA.Hs.24192.0.S1		MmugDNA.37086.1	10.02	11.93	14.55	18.79	133.23	135.87	138.27	10.18	4.23	1097.92	1742.88	1394.31	10.02	11.93	14.55	18.79	-105.8	-50.38	57.99	27.305
MmugDNA.3283.1.S1_at	SHOX2: similar to Short stature homeobox protein 2 (Paired-related homeobox protein SHOT) (Homeobox protein Og12X)	gDNA.g2979679	704327	MmugDNA.3283.1	15.66	14.44	11.36	7.47	168.68	71.23	94.98	8.22	2.06	964.88	1016.52	851.06	15.66	14.44	11.36	7.47	-76.23	-51.68	42.225	26.87
MmugDNA.4282.1.S1_at	LOC698639: similar to AT rich interactive domain 5B (MRF1-like)	gDNA.Hs.12702.0.S1	698639	MmugDNA.4282.1	15.22	10.65	16.23	27.03	658.82	55.88	731.88	28.95	6.16	1480.76	1956.03	944	15.22	10.65	16.23	27.03	-88.55	-42.99	58.75	24.575
MmuSTS.4286.1.S1_at	LOC695466: similar to scavenger receptor class F, member 2 isoform 2	49533500	695466	MmuSTS.4286.1	12.77	5.4	6.31	9.22	40.38	41.87	24.24	4.02	1.86	509.41	1042.69	599.46	12.77	5.4	6.31	9.22	-84.96	-47.15	44.49	24.505
Mmu.11636.1.S1_at	TYK2: tyrosine kinase 2	AF227563.1	574130	Mmu.11636.1	1	1	1	1	130.11	115.33	71.53	105.85	43.19	12.33	23.61	9.46	1	1	1	1	-14.99	-4.96	60.42	24.075
MmugDNA.24350.1.S1_at	MmugDNA.24350.1	gDNA.g13270468		MmugDNA.24350.1	8.71	10.82	8.62	7.43	612.17	888.84	445.41	74.52	45.36	57.12	149.11	39.29	8.71	10.82	8.62	7.43	-9.21	-2.19	41.865	23.775
MmugDNA.11614.1.S1_at	LY96: similar to Lymphocyte antigen 96 precursor (MD-2 protein) (ESOP-1)	gDNA.g7662503	696778	MmugDNA.11614.1	5.43	5.75	2.85	4.65	46.15	27.01	35.38	7.58	2.05	433.24	336.86	222.8	5.43	5.75	2.85	4.65	-74.3	-43.92	40.94	22.985
MmugDNA.28722.1.S1_at	TCF4: transcription factor 4	gDNA.Hs.289068.0.S3	695814	MmugDNA.28722.1	35.05	30.83	33.42	29.63	1681.81	1310.36	1876.18	51.03	34.89	625.78	399.94	475.1	35.05	30.83	33.42	29.63	-15.04	-8.82	33.035	21.855
MmugDNA.34480.1.S1_at	LOC696339: similar to insulin-like growth factor binding protein 5	gDNA.Hs2.427785.1.S1	696339	MmugDNA.34480.1	35.93	62.46	74.71	55.67	146.16	501.09	647.81	7.34	2.08	3552.36	5334.29	2657.6	35.93	62.46	74.71	55.67	-68.48	-41.47	37.91	21.775
Mmu.14838.1.S1_at	LOC702253: similar to solute carrier family 38, member 2	CB309373	702253	Mmu.14838.1	14.75	8.74	32.92	31.37	127.06	61.68	239.35	6.34	2.02	1760.9	1824.89	1065.66	14.75	8.74	32.92	31.37	-69.79	-41.46	38.065	21.74
MmugDNA.20431.1.S1_at	TFAP2B: transcription factor AP-2 beta (activating enhancer binding protein 2 beta)	gDNA.Hs.33102.1.S1	707679	MmugDNA.20431.1	8.6	20.78	7.07	6.78	902.01	1099.49	673.79	80.69	41.78	28.5	24.3	29.98	8.6	20.78	7.07	6.78	-2.51	-1.24	41.6	21.51
MmugDNA.12755.1.S1_s_at	BMP1: bone morphogenetic protein 1	gDNA.g4502420	707596	MmugDNA.12755.1	4.72	3.59	4.09	4.47	60.61	56.1	21.06	9.93	1.21	272.27	283.5	358.43	4.72	3.59	4.09	4.47	-71.06	-41.43	40.495	21.32
MmugDNA.28205.1.S1_at	MmugDNA.28205.1	gDNA.Hs.31141.0.S2		MmugDNA.28205.1	6.81	5.21	6.55	5.69	39.96	27.26	33.15	5.44	2.32	355.46	386.17	361.76	6.81	5.21	6.55	5.69	-60.66	-39.68	33.05	21
Mmu.1625.1.S1_at	LOC713082: similar to serum/glucocorticoid regulated kinase	CO774345	713082	Mmu.1625.1	20.7	16.62	21.67	28.96	1732.72	1128.81	2116.84	78.47	37.8	633.42	462.09	383.57	20.7	16.62	21.67	28.96	-22.24	-3.88	50.355	20.84
MmugDNA.9809.1.S1_s_at	LOC713191: similar to CCAAT/enhancer binding protein beta	gDNA.Hs.99029.0.S2	713191	MmugDNA.9809.1	47.23	53.72	53.63	45.77	626.28	176.43	1062.69	12.16	2.85	2860.63	3294.27	2061.85	47.23	53.72	53.63	45.77	-54.71	-38.58	33.435	20.715
MmunewRS.179.1.S1_at	GEM 1: GEM 1 protein	32895369	574107	MmunewRS.179.1	23.63	15.52	10.94	15.21	42.26	51.35	51.24	3.04	1.22	709.08	1409.51	1110.84	23.63	15.52	10.94	15.21	-68.61	-40.17	35.825	20.695
Mmu.7236.1.S1_at	CD9: similar to CD9 antigen (p24) (Leukocyte antigen MIC3) (Motility-related protein) (MRP-1) (Tetraspanin-29) (Tspan-29)	BV209125.1	712262	Mmu.7236.1	58.74	87.6	82.98	85.21	549.77	468.22	312.11	5.73	3.8	3893.61	2952.74	3971.65	58.74	87.6	82.98	85.21	-45.98	-36.64	25.855	20.22
MmuSTS.482.1.S1_at	LOC694505: similar to olfactory receptor, family 5, subfamily BU, member 1	55167666	694505	MmuSTS.482.1	1.85	5.45	4.13	4.39	337.02	168.25	482.47	86.93	38.04	17.96	8.22	20.43	1.85	5.45	4.13	4.39	-4.03	-1.78	45.48	19.91
MmugDNA.35051.1.S1_at	LOC700181: similar to Dermatopontin precursor (Tyrosine-rich acidic matrix protein) (TRAMP)	gDNA.Hs.80552.1.S1	700181	MmugDNA.35051.1	5.28	6.29	6.57	11.71	39.55	39.56	47.78	5.53	1.55	394.94	1005.43	832.76	5.28	6.29	6.57	11.71	-99.83	-37.07	52.68	19.31
MmugDNA.8688.1.S1_s_at	LOC698576: similar to plakophilin 4 isoform a	gDNA.g6806894	698576	MmugDNA.8688.1	10.04	9	13.37	5.68	884.41	317.7	1175.66	86.51	34.57	87.74	76.64	115.38	10.04	9	13.37	5.68	-10.12	-3.02	48.315	18.795
MmugDNA.35031.1.S1_at	LOC694086: similar to Transcription factor COE1 (OE-1) (O/E-1) (Early B-cell factor) (Olfactory neuronal transcription factor) (Olf-1)	gDNA.Hs.32425.0.A1	694086	MmugDNA.35031.1	59.79	50.45	46.99	23.09	3915.65	1383.12	3807.77	68.76	35.19	155.66	126.13	155.39	59.79	50.45	46.99	23.09	-3.25	-1.65	36.005	18.42
MmuSTS.1868.1.S1_at	LOC707729: similar to Cbp/p300-interacting transactivator, with Glu/Asp-rich carboxy-terminal domain, 2	49533120	707729	MmuSTS.1868.1	74.43	26.88	106.34	103.51	2262.13	883.1	1908.98	21.83	11.04	3929.27	3740.88	2133.51	74.43	26.88	106.34	103.51	-42.84	-25.66	32.335	18.35
MmugDNA.2797.1.S1_at	LOC717988: similar to Proline-rich protein 4 precursor (Lacrimal proline-rich protein) (Nasopharyngeal carcinoma-associated proline-rich protein 4)	gDNA.g6005801	717988	MmugDNA.2797.1	7.85	9.02	5.6	11.13	118.31	61.44	95.64	10.79	3.59	467.1	773.85	580.86	7.85	9.02	5.6	11.13	-73.43	-32.77	42.11	18.18
MmugDNA.15040.1.S1_at	LOC703608: similar to RNA binding motif, single stranded interacting protein 1 isoform c	gDNA.Hs.239870.1.S2	703608	MmugDNA.15040.1	32.62	37.05	32.04	31.52	607.08	195.91	556.43	13.33	6.19	1975.19	1550.45	1105.7	32.62	37.05	32.04	31.52	-45.75	-29.46	29.54	17.825
MmuSTS.3928.1.S1_at	COL4A1: alpha 1 type IV collagen	47776500	700281	MmuSTS.3928.1	11	12.51	11.5	16.97	71.51	24.44	54.64	3.88	2.01	1937.34	1237.99	1530.56	11	12.51	11.5	16.97	-117.78	-33.37	60.83	17.69
MmugDNA.40124.1.S1_at	TLN1: talin 1	gDNA.g5454129	696298	MmugDNA.40124.1	2.92	3.05	1.26	1.38	269.86	91.63	552.02	136.16	21.92	142.5	292.04	227.57	2.92	3.05	1.26	1.38	-94.73	-13.34	115.445	17.63
Mmu.14932.1.S1_at	LOC713513: similar to Alpha-centractin (Centractin) (Centrosome-associated actin homolog) (Actin-RPV) (ARP1)	BQ807503	713513	Mmu.14932.1	6.62	7.06	4.44	5.88	171.73	184.43	178.82	29.21	15.22	237.08	197.9	311.35	6.62	7.06	4.44	5.88	-40.55	-19.66	34.88	17.44
MmuSTS.1368.1.S1_at	ARNT2: aryl hydrocarbon receptor nuclear translocator 2	49533063	712786	MmuSTS.1368.1	6.43	19.65	14.29	19.69	186.03	60.27	105.14	7.77	2.43	988.17	2003.83	565.89	6.43	19.65	14.29	19.69	-80.27	-31.04	44.02	16.735
MmugDNA.9250.1.S1_at	ARNTL: aryl hydrocarbon receptor nuclear translocator-like	gDNA.g2094740	700464	MmugDNA.9250.1	6.16	3.18	4.92	5.96	618.62	51.26	504.18	76.8	17.22	178.8	130.62	176.31	6.16	3.18	4.92	5.96	-31.99	-15.83	54.395	16.525
MmugDNA.21636.1.S1_at	MmugDNA.21636.1	gDNA.Hs.2126.0.S2		MmugDNA.21636.1	1	2.37	2.81	1.02	195.72	142.56	86.07	82.92	30.48	10.68	11.73	8.62	1	2.37	2.81	1.02	-6.05	-2.24	44.485	16.36
MmugDNA.8050.1.S1_s_at	IL-6: interleukin 6 signal transducer receptor	gDNA.Hs.71968.0.A1	574127	MmugDNA.8050.1	62.46	36.12	40.4	34.09	765.66	679.63	492.11	14.91	8.57	1554.95	1621.75	1295.46	62.46	36.12	40.4	34.09	-35.04	-23.71	24.975	16.14
MmugDNA.34551.1.S1_at	NFIB: nuclear factor I/B	gDNA.g12654878	714098	MmugDNA.34551.1	18.31	12.65	19.75	14.63	1605.3	305.7	1379.89	66.66	25.03	223	245.38	153.67	18.31	12.65	19.75	14.63	-12.33	-7.23	39.495	16.13
Mmu.8707.1.S1_s_at	PTD004: GTP-binding protein PTD004	CO580105	697309	Mmu.8707.1	22.56	25.69	9.38	24.47	917.04	612.69	1129.34	44.41	23.87	398.68	268.9	447.4	22.56	25.69	9.38	24.47	-18.38	-8.24	31.395	16.055
MmugDNA.41336.1.S1_at	PRRX2: similar to Paired mesoderm homeobox protein 2 (PRX-2) (Paired-related homeobox protein 2)	gDNA.g12707581	716699	MmugDNA.41336.1	33.85	36.76	30.1	40.69	367.63	242.41	240.93	8	2.24	1618.68	1550.09	1615.46	33.85	36.76	30.1	40.69	-46.52	-29.82	27.26	16.03
MmugDNA.623.1.S1_at	MmugDNA.623.1	gDNA.Hs.250723.2.S1		MmugDNA.623.1	51.92	14.46	18.89	26.63	1030.6	76.03	1212.51	30.33	3.01	2232.02	2455.75	1724.43	51.92	14.46	18.89	26.63	-86.6	-28.25	58.465	15.63
MmugDNA.20037.1.S1_at	LOC700756: similar to sushi-repeat-containing protein, X-linked 2	gDNA.g7657618	700756	MmugDNA.20037.1	8.61	6.42	14.77	4.19	43.98	71.96	36.28	5.98	1.86	462.6	323.7	552.12	8.61	6.42	14.77	4.19	-54.06	-29.06	30.02	15.46
MmugDNA.29901.1.S1_at	HES1: similar to hairy and enhancer of split 1	gDNA.Hs.250666.0.S1	707140	MmugDNA.29901.1	51.45	26.44	58.6	70.55	3642.72	1277.09	3720.24	57.15	28.78	116.01	141.05	82.54	51.45	26.44	58.6	70.55	-2.17	-1.2	29.66	14.99
Mmu.10545.1.S1_at	LOC693801: similar to methyl-CpG binding domain protein 2 isoform 1	CN647675	693801	Mmu.10545.1	31.24	31.42	34.45	36.6	71.83	111.7	130.52	3.07	1.5	1213.83	1750.07	1379.38	31.24	31.42	34.45	36.6	-43.34	-27.93	23.205	14.715
MmugDNA.9707.1.S1_at	MmugDNA.9707.1	gDNA.Hs.289068.1.S1		MmugDNA.9707.1	22.47	13.74	14.76	11.03	252.56	105.22	245.41	13.01	4.52	964.42	505.88	608.64	22.47	13.74	14.76	11.03	-46.59	-24.66	29.8	14.59
MmugDNA.23176.1.S1_at	MmugDNA.23176.1	gDNA.Hs.226627.7.S1		MmugDNA.23176.1	14.72	19.41	4.79	11.88	155.12	107.37	75.86	8.45	3.02	606.23	447.1	437.69	14.72	19.41	4.79	11.88	-39.88	-25.93	24.165	14.475
MmugDNA.9802.1.S1_s_at	ALDH3A1: aldehyde dehydrogenase 3 family, member A1	gDNA.g4502034	703870	MmugDNA.9802.1	32.5	29.3	23.52	31.77	235.22	145.59	240.81	6.93	3.32	1220.42	2649.11	1029.98	32.5	29.3	23.52	31.77	-55.89	-25.41	31.41	14.365
MmugDNA.27687.1.S1_at	LOC700606: similar to guanine nucleotide binding protein gamma 11	gDNA.g4758447	700606	MmugDNA.27687.1	75.01	75.95	91.4	61.73	1409.1	638.2	439.83	10.14	2.52	2990.98	2461.5	2516.38	75.01	75.95	91.4	61.73	-35.04	-26.09	22.59	14.305
MmugDNA.28876.1.S1_at	LOC717379: similar to integrin beta chain, beta 3 precursor	gDNA.Hs.87149.0.A1	717379	MmugDNA.28876.1	1	3.19	1.94	2.95	200.16	135.18	100.25	67.98	26.61	9.1	8.85	11.19	1	3.19	1.94	2.95	-4.6	-1.42	36.29	14.015
MmugDNA.19540.1.S1_at	LOC720062: similar to olfactomedin-like 2B	gDNA.Hs.43658.0.S1	720062	MmugDNA.19540.1	12.05	15.21	7.48	9.4	176.8	270.7	185.73	19.51	10.19	325.28	339.67	354.5	12.05	15.21	7.48	9.4	-31.41	-17.64	25.46	13.915
MmugDNA.15036.1.S1_at	CDK6: cyclin-dependent kinase 6	gDNA.g4502740	701822	MmugDNA.15036.1	6.92	6.52	5.22	6.99	29.35	55.45	104.23	10.12	2.24	470.19	192.37	413.88	6.92	6.52	5.22	6.99	-56.09	-25.41	33.105	13.825
MmuSTS.2987.1.S1_at	LOC694992: similar to MADS box transcription enhancer factor 2, polypeptide C (myocyte enhancer factor 2C)	49533361	694992	MmuSTS.2987.1	7.94	6.54	8.83	16.41	213.99	191.76	195.43	21.25	12.36	283.33	287.35	211.78	7.94	6.54	8.83	16.41	-27.46	-15.05	24.355	13.705
MmugDNA.16663.1.S1_at	COL7A1: alpha 1 type VII collagen	gDNA.g4502960	709354	MmugDNA.16663.1	16.99	14.63	23.55	21.21	54.07	31.12	56.84	2.5	1.31	771.91	526.05	899.49	16.99	14.63	23.55	21.21	-39.18	-25.6	20.84	13.455
MmugDNA.28833.1.S1_at	LOC717169: similar to SLIT-ROBO Rho GTPase-activating protein 1	gDNA.Hs.155489.2.S1	717169	MmugDNA.28833.1	3.63	8.16	10.15	4.53	28.17	28.58	50.2	5.34	1.43	281.62	266.86	213.31	3.63	8.16	10.15	4.53	-40.48	-25.44	22.91	13.435
MmugDNA.4390.1.S1_s_at	TCF4: transcription factor 4	gDNA.g4507398	695814	MmugDNA.4390.1	38.45	44.61	32.83	50.58	2609.86	835.3	2726.82	50.3	15.09	1550.42	1055.3	1181.57	38.45	44.61	32.83	50.58	-30.71	-11.09	40.505	13.09
MmugDNA.38420.1.S1_s_at	TMBIM4: similar to Transmembrane BAX inhibitor motif-containing protein 4 (Z-protein) (S1R protein)	gDNA.g10197627	717825	MmugDNA.38420.1	79.45	57.88	65.73	82.51	439.03	225.85	459.94	5.23	2.41	2062.89	2455.79	2003.9	79.45	57.88	65.73	82.51	-30.81	-23.18	18.02	12.795
MmuSTS.2600.1.S1_at	LOC721817: similar to Zinc finger and BTB domain-containing protein 7A (Leukemia/lymphoma related factor) (Factor that binds to inducer of short transcripts protein 1) (Factor binding IST protein 1) (FBI-1) (HIV-1 1st-binding protein 1) (TTF-I-interacting pep...	62000441	721817	MmuSTS.2600.1	4.96	4.15	4.18	4.96	249.89	171.93	133.74	40.46	17.06	98.73	87.15	89.66	4.96	4.15	4.18	4.96	-20.15	-8.35	30.305	12.705
MmuSTS.1911.1.S1_at	E2F5: E2F transcription factor 5	49533166	703352	MmuSTS.1911.1	12.23	22.6	28.63	21.63	837.86	527.96	1149.54	40.58	23.14	75.17	124.93	95.84	12.23	22.6	28.63	21.63	-4.68	-2.26	22.63	12.7
MmugDNA.242.1.S1_at	MmugDNA.242.1	gDNA.Hs.23819.0.A1		MmugDNA.242.1	12.42	12.56	14.88	12.02	942.76	200.93	1458.21	66.65	20.54	64.79	69.42	68.35	12.42	12.56	14.88	12.02	-5.14	-3.79	35.895	12.165
MmugDNA.11086.1.S1_at	TIAL1: TIA-1 related protein	gDNA.Hs.322426.0.S1	703249	MmugDNA.11086.1	2.19	1.07	2.88	2.68	127.78	261.97	96.49	77.86	19.14	29.38	48.26	33.95	2.19	1.07	2.88	2.68	-17.59	-5.11	47.725	12.125
MmugDNA.25861.1.S1_at	LOC693544: similar to thymidine kinase 2, mitochondrial	gDNA.g10281329	693544	MmugDNA.25861.1	3.36	1	9.2	12.38	465.85	151.18	323.03	52	21.05	36.49	35.58	42.68	3.36	1	9.2	12.38	-6.49	-3.16	29.245	12.105
MmugDNA.38786.1.S1_at	LOC699034: similar to vestigial like 4	gDNA.Hs.155584.1.S2	699034	MmugDNA.38786.1	92.14	42.7	50.74	50.95	2345.54	1417.25	2477.18	36.86	21.85	394.33	436.45	195.31	92.14	42.7	50.74	50.95	-5.76	-1.63	21.31	11.74
MmuSTS.4318.1.S1_at	LOC696671: similar to solute carrier family 36 (proton/amino acid symporter), member 4	60543265	696671	MmuSTS.4318.1	3.59	1.51	5.6	3.58	15.1	32.79	29.87	7.07	2.4	143.29	107.28	116.27	3.59	1.51	5.6	3.58	-35.76	-20.95	21.415	11.675
MmuSTS.1312.1.S1_at	LOC698682: similar to DnaJ (Hsp40) homolog, subfamily C, member 6	52626968	698682	MmuSTS.1312.1	10.85	11.59	11.47	7.58	252.66	29.64	153.96	13.75	2.88	375.67	383.99	268.41	10.85	11.59	11.47	7.58	-33.27	-20.45	23.51	11.665
Mmu.16349.1.S1_at	LOC697961: similar to twinfilin-like protein	CO648275	697961	Mmu.16349.1	15.17	21.57	11.64	18.57	982.97	261.69	956.97	44.8	19.89	116.75	146.6	176.48	15.17	21.57	11.64	18.57	-8.85	-2.99	26.825	11.44
Mmu.16380.2.S1_at	RND3: similar to Rho-related GTP-binding protein RhoE (Rho family GTPase 3) (Rnd3)	CN647275	694168	Mmu.16380.2	52.13	20.86	20.43	31.21	88.94	67.86	90.91	2.8	1.41	2106.47	1107.24	850.91	52.13	20.86	20.43	31.21	-45.48	-21.27	24.14	11.34
MmuSTS.3158.1.S1_at	ARNTL: aryl hydrocarbon receptor nuclear translocator-like	47776400	700464	MmuSTS.3158.1	12.52	11.83	11.86	13.66	1225.96	157.76	1176.62	68.09	18.88	202.26	166.05	176.96	12.52	11.83	11.86	13.66	-14.64	-3.6	41.365	11.24
MmugDNA.4298.1.S1_at	MmugDNA.4298.1	gDNA.g11345479		MmugDNA.4298.1	3.29	2.08	2.42	3.74	78.86	207.82	127.58	47	19.04	15.2	20.73	32.36	3.29	2.08	2.42	3.74	-7.71	-3.36	27.355	11.2
MmugDNA.3056.1.S1_at	LOC696779: similar to transmembrane protein 55A	gDNA.Hs.21621.0.S1	696779	MmugDNA.3056.1	1.51	1.45	1	2.53	4.93	9.76	6.38	4.08	1.9	32.52	91.67	103.24	1.51	1.45	1	2.53	-45.03	-20.46	24.555	11.18
MmugDNA.24393.1.S1_at	MmugDNA.24393.1	gDNA.Hs.9625.2.S1		MmugDNA.24393.1	7.84	14.43	11.41	11.78	378.35	398.36	245.7	30.35	18.82	73.02	81.08	73.62	7.84	14.43	11.41	11.78	-6.78	-3.44	18.565	11.13
MmugDNA.17743.1.S1_at	KCNJ8: potassium inwardly-rectifying channel J8	gDNA.g4826801	706369	MmugDNA.17743.1	1.89	2.08	2.75	1.79	7.86	6.93	20.09	5.49	1.47	364.52	182.79	305.8	1.89	2.08	2.75	1.79	-129.8	-20.79	67.645	11.13
MmugDNA.38211.1.S1_s_at	LOC705467: similar to down-regulated by Ctnnb1, a	gDNA.Hs.85603.1.S1	705467	MmugDNA.38211.1	10.62	10.06	18.79	4.07	500.2	458.52	210.1	39.22	17.72	154.89	95.28	174.61	10.62	10.06	18.79	4.07	-13.54	-4.4	26.38	11.06
MmugDNA.17365.1.S1_at	S100A4: similar to Protein S100-A4 (S100 calcium-binding protein A4) (Metastasin) (Mts1 protein) (Placental calcium-binding protein) (Calvasculin)	gDNA.g9845514	715115	MmugDNA.17365.1	65.78	51.97	58.47	57.78	868.21	208.54	824.65	10.52	3.74	1163.63	4156.24	3853.31	65.78	51.97	58.47	57.78	-50.49	-18.31	30.505	11.025
MmuSTS.1895.1.S1_at	CXCL1: chemokine (C-X-C motif) ligand 1 (melanoma growth stimulating activity, alpha)	49533148	574222	MmuSTS.1895.1	3.35	2.28	3.33	3.41	57.28	21.87	47.28	13.13	5.22	114.83	93.4	87.17	3.35	2.28	3.33	3.41	-31.86	-16.78	22.495	11
MmugDNA.17607.1.S1_at	ARHGAP5: Rho GTPase activating protein 5	gDNA.Hs.267831.0.S2	677685	MmugDNA.17607.1	21.56	10.1	14.11	7.18	604.41	546	633.88	47.28	20.76	102.77	86.7	108.16	21.56	10.1	14.11	7.18	-7.76	-1.2	27.52	10.98
MmugDNA.13805.1.S1_at	LOC706236: hypothetical protein LOC706236	gDNA.Hs.288751.1.S1	706236	MmugDNA.13805.1	11.84	24.52	21.24	33.6	604.5	411.43	330.13	20.28	11.69	461.79	281.05	382.89	11.84	24.52	21.24	33.6	-16.9	-10	18.59	10.845
MmugDNA.42739.1.S1_at	MmugDNA.42739.1	gDNA.Hs.293782.0.A1		MmugDNA.42739.1	8.63	8.22	18.35	16.37	62.76	26.67	40.78	3.28	1.29	446.11	408.8	295.89	8.63	8.22	18.35	16.37	-30.58	-19.86	16.93	10.575
MmugDNA.27355.1.S1_at	LRP1: low density lipoprotein-related protein 1	gDNA.Hs.89137.0.A1	711049	MmugDNA.27355.1	18.2	15.39	14.14	13.03	286.02	304.23	184.89	16.49	7.83	369.86	696.47	462.7	18.2	15.39	14.14	13.03	-31.84	-13.14	24.165	10.485
MmugDNA.40942.1.S1_at	MmugDNA.40942.1	gDNA.Hs.173571.0.S1		MmugDNA.40942.1	41.84	44.3	33.23	28.12	282.6	359.41	232.27	7.77	3.01	1674.79	1736.66	594.52	41.84	44.3	33.23	28.12	-36.62	-17.9	22.195	10.455
MmugDNA.11417.1.S1_at	LOC705965: similar to Phospholipid hydroperoxide glutathione peroxidase, nuclear (GPX-4)	gDNA.Hs.289044.0.S1	705965	MmugDNA.11417.1	3.62	2.8	5.29	1.96	8.52	13.24	16.85	3.99	1.86	201.38	150.45	261.1	3.62	2.8	5.29	1.96	-61.57	-18.83	32.78	10.345
MmugDNA.33458.1.S1_at	MmugDNA.33458.1	gDNA.Hs.165084.0.A1		MmugDNA.33458.1	2.88	2.95	2.95	4.44	173	373.06	170.49	70.55	17.67	31.18	44.71	38.64	2.88	2.95	2.95	4.44	-11.09	-2.99	40.82	10.33
MmugDNA.22312.1.S1_at	NFIC: nuclear factor I/C	gDNA.Hs.184771.1.S1	721702	MmugDNA.22312.1	56.75	60.14	91.07	62.32	3021.02	1010.91	2647.87	32.97	17.44	325.34	321.66	264.25	56.75	60.14	91.07	62.32	-4.47	-3.21	18.72	10.325
MmugDNA.20985.1.S1_at	MmugDNA.20985.1	gDNA.Hs.198696.0.A1		MmugDNA.20985.1	9.67	7.45	6.09	5.68	65.27	95.74	72.06	10.81	5.63	83.37	355.62	303.91	9.67	7.45	6.09	5.68	-35.31	-14.65	23.06	10.14
MmugDNA.38599.1.S1_at	MPDU1: similar to Mannose-P-dolichol utilization defect 1 protein (Suppressor of Lec15 and Lec35 glycosylation mutation homolog) (SL15)	gDNA.g12001955	715962	MmugDNA.38599.1	50.58	42.67	29.65	30.67	1381.12	977.69	760.34	27.16	16.42	508.8	355.13	430.14	50.58	42.67	29.65	30.67	-11	-3.84	19.08	10.13
MmugDNA.24043.1.S1_at	DUSP1: dual specificity phosphatase 1	gDNA.Hs.171695.0.A1	702981	MmugDNA.24043.1	23.04	14.84	16.64	20.86	262.17	156.01	192.3	10.95	5.61	426.47	503.18	444.13	23.04	14.84	16.64	20.86	-24.7	-14.56	17.825	10.085
MmugDNA.30381.1.S1_at	BMP1: bone morphogenetic protein 1	gDNA.g5902814	707596	MmugDNA.30381.1	5.07	2.17	2.78	2.81	80.99	52.23	64.97	23.02	6.75	102.14	102.6	135.07	5.07	2.17	2.78	2.81	-38.44	-13.35	30.73	10.05
MmugDNA.3359.1.S1_at	LOC707050: similar to caldesmon 1 isoform 4	gDNA.Hs.287496.0.S1	707050	MmugDNA.3359.1	1.27	1.7	2.08	1.45	63.79	103.33	56.24	46.71	13.92	64.44	41.47	15.85	1.27	1.7	2.08	1.45	-25.33	-5.49	36.02	9.705
MmugDNA.43429.1.S1_at	MmugDNA.43429.1	gDNA.Hs.41295.0.S1		MmugDNA.43429.1	12.57	8.69	11.31	11.65	432.48	184.45	258.35	26.99	13.77	118.35	89.75	114.29	12.57	8.69	11.31	11.65	-9.71	-5.37	18.35	9.57
MmugDNA.27217.1.S1_s_at	LOC703608: similar to RNA binding motif, single stranded interacting protein 1 isoform c	gDNA.g8400719	703608	MmugDNA.27217.1	247.94	173.57	257.85	182.99	3932.68	1700.89	4207.56	15.29	9.03	3052.71	2847.18	2279.05	247.94	173.57	257.85	182.99	-12.71	-10.04	14	9.535
Mmu.6776.1.S1_at	LOC574135: transforming growth factor beta1	AF251269.1	574135	Mmu.6776.1	5.55	15.24	13.52	12.43	35.58	49.42	80.5	5.14	1.47	348.68	263.74	653.94	5.55	15.24	13.52	12.43	-38.31	-17.37	21.725	9.42
MmugDNA.30414.1.S1_s_at	SAT: similar to Diamine acetyltransferase 1 (Spermidine/spermine N(1)-acetyltransferase 1) (SSAT) (SSAT-1) (Putrescine acetyltransferase) (Polyamine N-acetyltransferase 1)	gDNA.Hs.28491.3.A1	697884	MmugDNA.30414.1	12.13	10.4	12.33	21.31	73.2	102.75	143.64	7.62	1.97	687.58	866.15	475.71	12.13	10.4	12.33	21.31	-48.24	-16.51	27.93	9.24
MmugDNA.24426.1.S1_at	MmugDNA.24426.1	gDNA.Hs.305923.2.A1		MmugDNA.24426.1	19.09	15.7	19.84	20.24	471.94	293.23	335.81	19.21	9.93	171.95	480.06	601.63	19.09	15.7	19.84	20.24	-21.93	-8.35	20.57	9.14
MmugDNA.27.1.S1_at	LOC706621: similar to bicaudal D homolog 2 isoform 1	gDNA.Hs2.330988.1.S1	706621	MmugDNA.27.1	4.65	4.12	5.5	4.12	116.57	53.39	43.73	15.94	4.65	167.29	134.86	173.83	4.65	4.12	5.5	4.12	-34.03	-13.59	24.985	9.12
MmuSTS.4783.1.S1_at	LOC703299: similar to FK506-binding protein 7 isoform 2 precursor	47776628	703299	MmuSTS.4783.1	7.89	5.51	10.63	15.29	121.83	207.84	86.23	13.44	5.37	148.09	305.88	259.63	7.89	5.51	10.63	15.29	-23.75	-12.84	18.595	9.105
Mmu.8787.1.S1_at	LOC699034: similar to vestigial like 4	BQ807401	699034	Mmu.8787.1	58.65	77.39	72.08	63.72	1714.07	1297.13	2294.44	26.11	16.21	228.44	187.14	159.56	58.65	77.39	72.08	63.72	-2.78	-1.52	14.445	8.865
MmugDNA.25322.1.S1_at	NFKB1: nuclear factor kappa-B, subunit 1	gDNA.g189179	710324	MmugDNA.25322.1	11.11	7.3	8.03	7.41	78.71	39.53	98.86	9.26	3.02	233.25	284.39	217.05	11.11	7.3	8.03	7.41	-29.69	-14.38	19.475	8.7
MmuSTS.3369.1.S1_at	LOC699401: hypothetical protein LOC699401	60301376	699401	MmuSTS.3369.1	21.31	29.12	26.41	28.82	700.82	276.71	599.81	19.82	9.21	390.5	455.67	430.4	21.31	29.12	26.41	28.82	-16.23	-8.16	18.025	8.685
NC-001345.CDS22.S1_at	NC-001345.CDS22			NC-001345.CDS22	1.46	8.66	5.56	1.51	106.5	218.9	134.21	36.74	16.1	16.39	5.72	21.86	1.46	8.66	5.56	1.51	-3.59	-1.26	20.165	8.68
MmugDNA.4440.1.S1_at	MmugDNA.4440.1	gDNA.Hs.201778.0.A1		MmugDNA.4440.1	5.77	1.35	3.19	1	121.86	77.98	71.68	33.92	14.18	16.48	22.75	17.94	5.77	1.35	3.19	1	-7.18	-3.15	20.55	8.665
MmugDNA.26163.1.S1_at	LOC698848: similar to dual-specificity tyrosine-(Y)-phosphorylation regulated kinase 1B isoform b	gDNA.g4758221	698848	MmugDNA.26163.1	17.31	17.16	12.44	14.25	618.22	342.45	421.56	30.36	15.82	91.33	86.12	30.5	17.31	17.16	12.44	14.25	-4.41	-1.49	17.385	8.655
MmugDNA.42336.1.S1_s_at	LOC697105: similar to STIP1 homology and U-box containing protein 1	gDNA.Hs.25197.3.S1	697105	MmugDNA.42336.1	68.93	49.4	32.09	49.52	2096.17	1136.69	1394.11	31.62	15.9	415.05	268.32	505.52	68.93	49.4	32.09	49.52	-7.81	-1.37	19.715	8.635
MmuSTS.743.1.S1_at	LOC716452: similar to Transcription factor AP-1 (Activator protein 1) (AP1) (Proto-oncogene c-jun) (V-jun avian sarcoma virus 17 oncogene homolog) (Jun A) (AH119)	47776786	716452	MmuSTS.743.1	16.43	7.55	9.78	7.18	620.79	45.24	321	32.42	4.63	673.22	168.6	319.25	16.43	7.55	9.78	7.18	-38.38	-12.64	35.4	8.635
MmugDNA.7996.1.S1_at	MmugDNA.7996.1	gDNA.g7662091		MmugDNA.7996.1	10	10.6	10.57	10.2	433.63	433.18	284.32	36.75	15.22	119.6	58.7	73.18	10	10.6	10.57	10.2	-7.64	-1.96	22.195	8.59
MmugDNA.475.1.S1_at	LOC721817: similar to Zinc finger and BTB domain-containing protein 7A (Leukemia/lymphoma related factor) (Factor that binds to inducer of short transcripts protein 1) (Factor binding IST protein 1) (FBI-1) (HIV-1 1st-binding protein 1) (TTF-I-interacting pep...	gDNA.Hs.104640.2.S3	721817	MmugDNA.475.1	1.25	1.46	3.97	2.98	9.85	24.49	32.79	9.91	2.75	62.91	54.07	53.07	1.25	1.46	3.97	2.98	-24.27	-14.38	17.09	8.565
MmugDNA.14345.1.S1_at	MmugDNA.14345.1	gDNA.Hs.62515.0.S2		MmugDNA.14345.1	87.67	27.09	55.24	26.49	2647.48	1608.39	2872.44	49.74	15.72	208.35	387.45	177.16	87.67	27.09	55.24	26.49	-5.42	-1.2	27.58	8.46
MmugDNA.26442.1.S1_at	LOC708996: similar to CD99 antigen-like 2 isoform E3-E4-E3-E4	gDNA.Hs.169388.1.S1	708996	MmugDNA.26442.1	2.17	3.09	5	2.98	114.68	88.72	105.01	31.26	14.12	44.06	30.85	32.42	2.17	3.09	5	2.98	-10.66	-2.77	20.96	8.445
MmuSTS.4540.1.S1_at	LOC694358: similar to leucine-rich repeat kinase 1	59676284	694358	MmuSTS.4540.1	5.23	2.08	2.55	6.64	25.94	21.46	16.93	5.45	2.15	104.74	96.34	125.02	5.23	2.08	2.55	6.64	-28.1	-14.69	16.775	8.42
MmugDNA.34691.1.S1_at	MmugDNA.34691.1	gDNA.Hs.193864.0.A1		MmugDNA.34691.1	4.28	3.9	7.88	8.3	317.31	138.35	176.1	34.2	15.31	26.14	20.28	24.76	4.28	3.9	7.88	8.3	-3.83	-1.53	19.015	8.42
MmugDNA.34092.1.S1_at	MmugDNA.34092.1	gDNA.g13543714		MmugDNA.34092.1	34.58	75.63	30.21	49.76	1777.96	1018.13	1850.16	34.5	15.48	212.66	217.91	275.95	34.58	75.63	30.21	49.76	-5.15	-1.35	19.825	8.415
MmugDNA.10864.1.S1_at	LOC713420: similar to solute carrier family 39 (zinc transporter), member 13	gDNA.Hs2.9070.1.S1	713420	MmugDNA.10864.1	4.73	7.81	8.81	6.65	49.19	87.78	80.52	10.25	5.32	122.02	101.26	131.68	4.73	7.81	8.81	6.65	-17.14	-11.49	13.695	8.405
MmuSTS.2860.1.S1_at	MmuSTS.2860.1	51854149		MmuSTS.2860.1	624.56	103.72	33.47	80.96	1413.25	815	479.18	4.29	1.23	7216.53	6418.91	7290.04	624.56	103.72	33.47	80.96	-34.71	-15.54	19.5	8.385
MmugDNA.2654.1.S1_at	MmugDNA.2654.1	gDNA.Hs2.435477.3.S1		MmugDNA.2654.1	2.69	8.37	4.82	9.13	164.69	144.66	127.7	24.71	14.51	21.15	22.7	31.32	2.69	8.37	4.82	9.13	-4.13	-2.19	14.42	8.35
Mmu.4269.1.S1_at	REPS1: RALBP1 associated Eps domain containing 1	CO579667	702858	Mmu.4269.1	38.46	36.5	19.31	33.2	814.49	525.16	595.63	20.63	14.32	115.63	84.8	101.79	38.46	36.5	19.31	33.2	-3.14	-2.24	11.885	8.28
Mmu.4088.1.S1_at	LOC704975: similar to RAB31, member RAS oncogene family	CB308666	704975	Mmu.4088.1	34.41	40.43	43.17	36.95	190.2	175.94	259.79	5.48	3	776.32	655.5	769.66	34.41	40.43	43.17	36.95	-18.96	-13.45	12.22	8.225
MmuSTS.296.1.S1_s_at	LOC714975: similar to Olfactory receptor 10G7	55167609	714975	MmuSTS.296.1	5.4	2.34	2.07	7.15	106.69	79.4	119.51	26.46	13.96	22.97	12.02	27.85	5.4	2.34	2.07	7.15	-5.22	-2.48	15.84	8.22
MmugDNA.34645.1.S1_s_at	LOC714309: hypothetical protein LOC714309	gDNA.Hs.85155.0.S2	714309	MmugDNA.34645.1	29.47	36.99	63.39	67.12	931.19	182.48	984.24	14.23	5.2	1281.29	1329.27	482.09	29.47	36.99	63.39	67.12	-21.08	-11.05	17.655	8.125
MmugDNA.23684.1.S1_at	LOC707439: similar to microtubule-associated protein 1 light chain 3 alpha	gDNA.Hs.134707.1.S1	707439	MmugDNA.23684.1	10.96	5.99	15	6.84	52.18	23.78	48.86	4.54	2.07	204.64	240.66	362.14	10.96	5.99	15	6.84	-28.29	-14.17	16.415	8.12
MmugDNA.31356.1.S1_at	MAP3K7: mitogen-activated protein kinase kinase kinase 7	gDNA.Hs.7510.0.S2	703101	MmugDNA.31356.1	20.46	13.42	23.03	20.4	373.97	221.36	258.39	14.84	9.43	198.16	226.09	184.53	20.46	13.42	23.03	20.4	-10.58	-6.8	12.71	8.115
MmugDNA.43446.1.S1_at	MmugDNA.43446.1	gDNA.Hs.145111.0.A1		MmugDNA.43446.1	6.11	6.99	8.98	8.73	205.03	181.57	176.59	24.31	12.15	76.49	60.57	110.91	6.11	6.99	8.98	8.73	-10.36	-4.07	17.335	8.11
MmuSTS.203.1.S1_at	MmuSTS.203.1	51853853		MmuSTS.203.1	4.86	3.43	2.42	1	154.74	222.44	40.45	48.44	13.91	12.39	14.06	14.2	4.86	3.43	2.42	1	-4.74	-2.19	26.59	8.05
MmugDNA.37799.1.S1_at	MmugDNA.37799.1	gDNA.Hs2.210349.1.S2		MmugDNA.37799.1	2.16	3.6	3.53	3	73.05	95.04	63.28	25.19	13.68	42.09	23.65	17.12	2.16	3.6	3.53	3	-8.56	-2.35	16.875	8.015
MmugDNA.41806.1.S1_s_at	MmugDNA.41806.1	gDNA.Hs.5233.0.A1		MmugDNA.41806.1	24.79	24.1	20.21	29.39	116.3	106.02	144.71	4.95	2.77	674.13	429.85	463.19	24.79	24.1	20.21	29.39	-21.17	-13.25	13.06	8.01
MmuSTS.3564.1.S1_at	LOC699721: similar to claudin 9	60543164	699721	MmuSTS.3564.1	1.9	2.1	1.78	2.51	55.75	66.6	66.9	30.93	14.23	15.9	13.84	5.53	1.9	2.1	1.78	2.51	-5.66	-1.7	18.295	7.965
MmugDNA.19837.1.S1_at	LOC718266: similar to Interleukin-18-binding protein precursor (IL-18BP) (Interferon gamma-inducing factor-binding protein)	gDNA.g10835223	718266	MmugDNA.19837.1	2.22	4.03	3.73	2.26	157.73	298.38	58.38	56.84	12.98	20.33	32.35	24.2	2.22	4.03	3.73	2.26	-8.4	-2.91	32.62	7.945
MmugDNA.8556.1.S1_at	MmugDNA.8556.1	gDNA.Hs.306434.0.S1		MmugDNA.8556.1	1.12	1.74	2	1.38	123.63	98.33	31.45	54.96	14.14	6.38	11.18	7.4	1.12	1.74	2	1.38	-5.55	-1.67	30.255	7.905
MmugDNA.25089.1.S1_at	MmugDNA.25089.1	gDNA.Hs.30002.1.A1		MmugDNA.25089.1	1.34	2.31	1.2	1.69	60.69	98.35	71.22	47.77	14.6	15.79	6.27	7.82	1.34	2.31	1.2	1.69	-6.57	-1.21	27.17	7.905
MmugDNA.7903.1.S1_at	LOC718644: similar to Rho guanine nucleotide exchange factor (GEF) 17	gDNA.g7662063	718644	MmugDNA.7903.1	12.61	13.46	10.47	15.8	64.85	31.57	88.61	4.9	2	258.81	423.34	270.87	12.61	13.46	10.47	15.8	-24.15	-13.8	14.525	7.9
MmugDNA.30040.1.S1_at	CPXM2: carboxypeptidase X (M14 family), member 2	gDNA.Hs.313515.0.A1	693465	MmugDNA.30040.1	6.23	7.92	9.2	7.6	234.2	293.98	146.46	29.19	12.68	188.31	153.01	50.38	6.23	7.92	9.2	7.6	-15.92	-3.12	22.555	7.9
MmugDNA.33442.1.S1_at	ANGPTL2: angiopoietin-like 2	gDNA.Hs.8025.0.S1	701444	MmugDNA.33442.1	9.76	9.29	8.97	15.28	37.06	56.06	59.08	4.88	2.08	289	394.98	181.25	9.76	9.29	8.97	15.28	-27.39	-13.53	16.135	7.805
MmugDNA.8894.1.S1_at	MmugDNA.8894.1	gDNA.Hs.135162.0.A1		MmugDNA.8894.1	15.15	24.25	10.02	15.64	420.76	185.06	435.36	21.91	11.1	155.19	86.19	147.48	15.15	24.25	10.02	15.64	-8.07	-4.31	14.99	7.705
MmugDNA.39770.1.S1_at	LOC715700: similar to sarcoma amplified sequence	gDNA.Hs.50984.0.S1	715700	MmugDNA.39770.1	17.77	13.65	21.95	19.53	361.61	129.38	355.29	15.01	6.41	331.28	334.41	209.12	17.77	13.65	21.95	19.53	-15.8	-8.82	15.405	7.615
MmugDNA.26072.1.S1_at	MmugDNA.26072.1	gDNA.Hs.118021.2.A1		MmugDNA.26072.1	26.07	23.78	32.17	21.06	130.15	121.28	79.19	4.09	1.72	537.15	431.11	471.51	26.07	23.78	32.17	21.06	-18.77	-13.46	11.43	7.59
MmugDNA.8313.1.S1_at	MVK: mevalonate kinase	gDNA.Hs.306585.0.S1	707645	MmugDNA.8313.1	19.01	16.07	21.64	5.34	361.45	424.63	280.1	23.07	13.1	54.33	83.23	45.38	19.01	16.07	21.64	5.34	-3.96	-2.03	13.515	7.565
MmugDNA.24794.1.S1_s_at	LOC716424: similar to smoothelin isoform a	gDNA.g5902099	716424	MmugDNA.24794.1	35.45	28.13	35.47	42.2	693.87	803.78	467.8	18.57	12.37	154.16	309.8	233.74	35.45	28.13	35.47	42.2	-6.37	-2.72	12.47	7.545
MmugDNA.24260.1.S1_at	MmugDNA.24260.1	gDNA.Hs.11556.0.A1		MmugDNA.24260.1	23.77	28.15	19.12	27.97	81.59	111.39	57.79	3.31	1.71	796.77	446.72	422.58	23.77	28.15	19.12	27.97	-22.84	-13.34	13.075	7.525
MmugDNA.8086.1.S1_at	LOC711279: similar to leucine zipper, putative tumor suppressor 2	gDNA.g13623228	711279	MmugDNA.8086.1	14.19	16.63	10.28	16.12	40.55	96.8	108.93	5.83	2.02	252.32	280.6	262.99	14.19	16.63	10.28	16.12	-18.85	-12.96	12.34	7.49
MmugDNA.26500.1.S1_at	KIAA0564: KIAA0564 protein	gDNA.Hs.151385.1.S1	699086	MmugDNA.26500.1	54.78	77.11	68.8	83.58	416.1	123.58	349.13	3.98	1.29	1622.04	2863.84	1124.15	54.78	77.11	68.8	83.58	-26.54	-13.68	15.26	7.485
MmuSTS.1944.1.S1_at	NCAM1: neural cell adhesion molecule 1	47776911	693789	MmuSTS.1944.1	4.13	7.87	3.96	2.14	46.82	63.73	60.38	12.78	6.46	66.98	55.97	109.36	4.13	7.87	3.96	2.14	-17.29	-8.36	15.035	7.41
MmuSTS.4040.1.S1_at	LOC703950: similar to slit homolog 3	60301453	703950	MmuSTS.4040.1	16.03	29.37	36.87	37.86	125.44	118.46	94.29	3.72	2.19	692.93	1283.27	462.26	16.03	29.37	36.87	37.86	-27.5	-12.62	15.61	7.405
MmugDNA.42164.1.S1_s_at	MmugDNA.42164.1	gDNA.Hs2.1867.2.S1		MmugDNA.42164.1	1	1	1	2.15	13.97	56.88	47.19	35.37	10.42	16.73	14.9	7.47	1	1	1	2.15	-11.69	-4.32	23.53	7.37
MmugDNA.27073.1.S1_s_at	MTAP: 5'-methylthioadenosine phosphorylase	gDNA.Hs.152817.1.S1	709020	MmugDNA.27073.1	30.93	33.44	40.96	26.72	1199.28	394.61	1247.39	29.29	13.33	145.13	57.43	172.35	30.93	33.44	40.96	26.72	-3.72	-1.41	16.505	7.37
MmugDNA.39777.1.S1_at	NFIB: nuclear factor I/B	gDNA.Hs.33287.1.S2	714098	MmugDNA.39777.1	111.08	60.61	65.37	104.08	2049.1	922.22	2786.99	22.7	11.53	556.43	713.55	273.04	111.08	60.61	65.37	104.08	-6.06	-3.15	14.38	7.34
Mmu.7944.1.S1_at	CTDSP2: nuclear LIM interactor-interacting factor 2	CB230211	715956	Mmu.7944.1	28.53	37.04	38.82	26.58	68.07	148.91	221.46	4.43	1.61	744.65	959.03	518.55	28.53	37.04	38.82	26.58	-22.64	-13.04	13.535	7.325
MmugDNA.38264.1.S1_at	LOC703851: similar to transmembrane and coiled-coil domains 4	gDNA.Hs.18331.0.A1	703851	MmugDNA.38264.1	3.42	1.64	3.36	1	8.21	81.68	66.7	26.62	4.35	52.02	67.43	52.02	3.42	1.64	3.36	1	-28.93	-10.24	27.775	7.295
MmugDNA.39645.1.S1_at	MmugDNA.39645.1	gDNA.Hs.301866.0.A1		MmugDNA.39645.1	45.03	22.68	15.89	24.65	506.65	440.67	383.71	16.15	10.86	189.44	303.45	134.03	45.03	22.68	15.89	24.65	-7.49	-3.56	11.82	7.21
MmugDNA.19381.1.S1_at	LOC714291: similar to CUG triplet repeat, RNA binding protein 2	gDNA.Hs.90043.0.A1	714291	MmugDNA.19381.1	6.73	2.73	1.19	3.03	98.91	116.54	72.51	32.15	12.63	18.68	25.81	18.39	6.73	2.73	1.19	3.03	-6.66	-1.34	19.405	6.985
MmugDNA.3853.1.S1_at	MmugDNA.3853.1	gDNA.Hs.177164.0.A1		MmugDNA.3853.1	2.58	2.56	2.67	4.36	16.2	14.75	13.03	4.76	2.23	46.42	93.36	84.68	2.58	2.56	2.67	4.36	-24.67	-11.74	14.715	6.985
MmugDNA.18509.1.S1_at	MmugDNA.18509.1	gDNA.Hs2.416122.1.S1		MmugDNA.18509.1	10.99	6.52	22.15	9.15	556.14	340.26	173.02	31.2	12.51	50.99	39.84	34.39	10.99	6.52	22.15	9.15	-3.58	-1.35	17.39	6.93
MmugDNA.32339.1.S1_at	MmugDNA.32339.1	gDNA.Hs.6298.0.S4		MmugDNA.32339.1	10.14	12.57	10.16	8.87	44.29	36.66	54.22	4.26	2.06	201.37	201.76	195.45	10.14	12.57	10.16	8.87	-19.27	-11.77	11.765	6.915
MmugDNA.29094.1.S1_at	MmugDNA.29094.1	gDNA.Hs.130093.0.S1		MmugDNA.29094.1	53.19	20.17	110.62	112.93	1395.74	880.18	1672.57	18.52	10.25	517.61	432.06	436.79	53.19	20.17	110.62	112.93	-6.43	-3.49	12.475	6.87
MmugDNA.23305.1.S1_at	LOC716527: similar to Flotillin-2 (Reggie-1) (REG-1)	gDNA.g13277549	716527	MmugDNA.23305.1	10.81	3.24	8.36	2.34	168.99	131.28	85.38	22.32	9.71	47.62	99.67	57.83	10.81	3.24	8.36	2.34	-11.71	-3.99	17.015	6.85
MmugDNA.39156.1.S1_at	LOC695734: similar to ets variant gene 6	gDNA.g4503610	695734	MmugDNA.39156.1	20.75	11.57	17	13.07	287.06	133.32	247.94	14.36	7.41	180.66	156.9	128	20.75	11.57	17	13.07	-9.96	-6.27	12.16	6.84
MmugDNA.30652.1.S1_s_at	FLI1: Friend leukemia virus integration 1	gDNA.g182659	714748	MmugDNA.30652.1	2.09	1.62	2.62	3.21	28.47	28.51	18.54	11.1	4.66	53.49	27.81	49.29	2.09	1.62	2.62	3.21	-18.82	-9	14.96	6.83
MmugDNA.18782.1.S1_at	MmugDNA.18782.1	gDNA.Hs.201075.0.A1		MmugDNA.18782.1	5.02	4.61	4.22	3.48	198.8	82.21	161.56	35.29	12.13	17.52	26.89	16.56	5.02	4.61	4.22	3.48	-4.65	-1.53	19.97	6.83
MmuSTS.1570.1.S1_at	NBEA: neurobeachin	62000261	714386	MmuSTS.1570.1	9.05	5.23	5.16	6.48	137.24	41.63	126.63	15.87	6.95	73.88	83.82	52.74	9.05	5.23	5.16	6.48	-11.09	-6.67	13.48	6.81
MmugDNA.35836.1.S1_at	LOC719038: similar to adaptor-related protein complex 2, alpha 1 subunit isoform 2	gDNA.Hs.296426.1.S1	719038	MmugDNA.35836.1	16.45	26.31	17.57	23.66	194.92	194.71	312.99	11.3	5.33	271.65	375.16	371.74	16.45	26.31	17.57	23.66	-16.1	-8.04	13.7	6.685
Mmu.2088.1.S1_at	EGFR: epidermal growth factor receptor	S75916.1	613027	Mmu.2088.1	11.04	13.1	10.09	12	29.78	91.07	99.95	6.61	2.21	280.07	204.36	238.51	11.04	13.1	10.09	12	-20.63	-11.14	13.62	6.675
MmugDNA.20879.1.S1_at	LOC703981: similar to NOD9 protein isoform 1	gDNA.Hs2.31097.2.S1	703981	MmugDNA.20879.1	7.53	5.65	5.07	2.97	58.33	83.32	44.74	12.14	5.48	90.98	76.55	66.64	7.53	5.65	5.07	2.97	-14.68	-7.85	13.41	6.665
MmugDNA.16746.1.S1_at	MmugDNA.16746.1	gDNA.Hs.125304.0.A1		MmugDNA.16746.1	66.05	35.55	27.33	30.77	429.42	614.19	390.53	12.17	7.05	437.24	335.23	565.86	66.05	35.55	27.33	30.77	-11.19	-6.22	11.68	6.635
MmugDNA.40206.1.S1_at	LOC699105: similar to transmembrane emp24 protein transport domain containing 4	gDNA.Hs.301226.1.S1	699105	MmugDNA.40206.1	41.74	31.85	38.61	58.11	1085.1	134.42	1480.91	21.69	5.57	505.77	573.88	527.3	41.74	31.85	38.61	58.11	-12.88	-7.59	17.285	6.58
MmugDNA.25040.1.S1_at	CLU: clusterin	gDNA.g180619	677866	MmugDNA.25040.1	64.12	64.25	45.33	65.24	341.47	122.43	163.86	3.49	1.3	1246.09	1082.48	726.8	64.12	64.25	45.33	65.24	-17.32	-11.8	10.405	6.55
Mmu.10556.1.S1_s_at	LOC719260: similar to absent in melanoma 2	CO645816	719260	Mmu.10556.1	3.04	1	3.02	2.29	16.3	18.26	11.47	6.91	2.9	46.26	38.67	49.71	3.04	1	3.02	2.29	-20.71	-10.17	13.81	6.535
MmugDNA.39757.1.S1_at	MmugDNA.39757.1	gDNA.Hs.13254.0.A1		MmugDNA.39757.1	8.04	8.03	10.97	6.24	45.1	46.46	42.34	5.55	2.65	168.06	188.95	143.39	8.04	8.03	10.97	6.24	-20.71	-10.39	13.13	6.52
MmugDNA.26894.1.S1_at	MmugDNA.26894.1	gDNA.Hs.86320.0.A1		MmugDNA.26894.1	5.09	4.07	4.55	3.12	73.38	73.85	61.91	16.94	8.93	77.1	43.66	36.64	5.09	4.07	4.55	3.12	-12.48	-4.06	14.71	6.495
MmugDNA.39511.1.S1_at	LOC694022: similar to nuclear factor I/A	gDNA.Hs.173933.0.S3	694022	MmugDNA.39511.1	2.4	3.72	7.38	5.74	109.01	44.37	68.5	15.34	4.76	55.29	67.96	63.77	2.4	3.72	7.38	5.74	-13.15	-8.18	14.245	6.47
MmugDNA.10429.1.S1_at	LOC698984: similar to p53-associated parkin-like cytoplasmic protein	gDNA.Hs.117177.0.S1	698984	MmugDNA.10429.1	1.66	2.93	2.57	2.18	68.4	57.65	61.85	25.64	10.76	29.65	10.83	21.78	1.66	2.93	2.57	2.18	-8.36	-2.1	17	6.43
MmugDNA.13107.1.S1_at	LOC716859: similar to neuro-oncological ventral antigen 2	gDNA.Hs.33021.0.S1	716859	MmugDNA.13107.1	2.77	2.49	3.69	2.55	76.42	80.22	39.55	22.06	10.31	11.82	11.54	11.84	2.77	2.49	3.69	2.55	-4	-2.49	13.03	6.4
MmuSTS.3692.1.S1_at	LOC710784: similar to Kruppel-like factor 6	51853694	710784	MmuSTS.3692.1	86.57	84.29	85.33	62.99	444.39	109.81	293.35	3.55	1.51	1826.54	1178.09	1008.36	86.57	84.29	85.33	62.99	-16.78	-11.25	10.165	6.38
Mmu.9738.1.S1_at	CNTNAP4: contactin associated protein-like 4	AF424819.1	574170	Mmu.9738.1	3.48	5.92	4.16	6.62	238.28	18.69	159	27.25	6.63	50.28	37.04	48.59	3.48	5.92	4.16	6.62	-8.84	-6.06	18.045	6.345
MmuSTS.4665.1.S1_at	FAS: Fas (TNF receptor superfamily, member 6)	47777206	574332	MmuSTS.4665.1	2.34	5.75	3	6.13	8.81	20.38	21.8	3.86	1.33	310.6	110.04	83.33	2.34	5.75	3	6.13	-39.94	-11.3	21.9	6.315
MmugDNA.26130.1.S1_s_at	LOC702071: similar to protocadherin gamma subfamily A, 12 isoform 2 precursor	gDNA.g5457056	702071	MmugDNA.26130.1	14.3	18.46	16.01	16.05	120.49	93.76	114.82	6.94	4.01	163.56	275.65	268.39	14.3	18.46	16.01	16.05	-14.44	-8.57	10.69	6.29
MmugDNA.34133.1.S1_at	LOC694992: similar to MADS box transcription enhancer factor 2, polypeptide C (myocyte enhancer factor 2C)	gDNA.Hs.78995.1.A3	694992	MmugDNA.34133.1	9.59	8.45	6.68	8.1	25.42	50.85	51.71	5.11	1.74	167.15	145.26	102.74	9.59	8.45	6.68	8.1	-17.09	-10.76	11.1	6.25
MmugDNA.28717.1.S1_at	TCF4: transcription factor 4	gDNA.Hs.289068.0.S1	695814	MmugDNA.28717.1	25.95	12.32	11.43	26.69	714.31	127.62	530.53	23.94	8.15	268.26	111.03	191.68	25.95	12.32	11.43	26.69	-9.73	-4.35	16.835	6.25
MmugDNA.14205.1.S1_at	LOC694158: similar to junctophilin 2 isoform 1	gDNA.Hs2.134594.1.A1	694158	MmugDNA.14205.1	1	1	1	1	12.86	26	1	11.2	11.2	2.43	1	1	1	1	1	1	-1.26	-1.26	6.23	6.23
MmugDNA.17877.1.S1_at	MmugDNA.17877.1	gDNA.g12275908		MmugDNA.17877.1	1.85	1.22	1.52	3.48	68.11	139.44	31.2	39.3	7.24	40.18	23.17	50.17	1.85	1.22	1.52	3.48	-18.8	-5.14	29.05	6.19
Mmu.2976.1.S1_at	IL1R1: interleukin 1 receptor, type I	CO774007	711726	Mmu.2976.1	9.75	2.44	2.1	1.32	39.5	50.68	36.36	10.45	4.24	95.03	64.31	74.89	9.75	2.44	2.1	1.32	-19.29	-8.11	14.87	6.175
MmugDNA.11678.1.S1_at	MmugDNA.11678.1	gDNA.Hs.264330.2.A1		MmugDNA.11678.1	84.9	62.6	70.16	43.47	1103.1	1390.04	818.94	17.54	10.73	208.11	518.93	455.29	84.9	62.6	70.16	43.47	-5.89	-1.58	11.715	6.155
MmugDNA.11857.1.S1_at	MmugDNA.11857.1	gDNA.Hs2.374986.1.S1		MmugDNA.11857.1	1	3.97	2.44	1.45	147.6	76.34	47.03	37.57	10.48	9.52	9.72	6.34	1	3.97	2.44	1.45	-3.86	-1.77	20.715	6.125
MmugDNA.36610.1.S1_at	LOC698138: similar to MID1 interacting G12-like protein	gDNA.g10864050	698138	MmugDNA.36610.1	30.73	15.63	47.5	49.98	405.37	19.43	444.15	7.8	1.26	497.74	946.49	653.32	30.73	15.63	47.5	49.98	-19.12	-10.98	13.46	6.12
MmuSTS.3866.1.S1_at	MmuSTS.3866.1	62000615		MmuSTS.3866.1	42.39	26.53	42.6	34.53	790.14	503.18	415.39	15.88	9.99	171.69	147.47	200.71	42.39	26.53	42.6	34.53	-4.67	-2.24	10.275	6.115
MmuSTS.4072.1.S1_at	LOC695559: similar to heparin-binding EGF-like growth factor	47776557	695559	MmuSTS.4072.1	137.99	139.07	167.27	162.02	2788.91	1647.69	3303.39	17.14	10.82	404.41	283.58	504.86	137.99	139.07	167.27	162.02	-2.56	-1.3	9.85	6.06
MmuSTS.3048.1.S1_at	LOC714144: similar to RAB11a, member RAS oncogene family	47777019	714144	MmuSTS.3048.1	41.35	50.96	28.34	11.63	866.13	362.09	588.13	19.02	9.38	237.62	224.52	143.25	41.35	50.96	28.34	11.63	-6.41	-2.73	12.715	6.055
MmugDNA.20151.1.S1_x_at	RYK: RYK receptor-like tyrosine kinase	gDNA.Hs.79350.1.S1	718950	MmugDNA.20151.1	22.17	24.48	26.71	27.29	235.24	50.26	182.48	6.09	2.08	549.5	449.91	600.04	22.17	24.48	26.71	27.29	-21.01	-9.97	13.55	6.025
Mmu.2231.1.S1_at	CAPZA1: F-actin capping protein alpha-1 subunit	CB230367	705653	Mmu.2231.1	28.62	54.02	46.71	51.64	1316.83	320.05	1050.43	20.04	8.88	393.77	156.71	385.89	28.62	54.02	46.71	51.64	-6.74	-3.14	13.39	6.01
MmugDNA.28393.1.S1_s_at	CBX6: similar to neuronal pentraxin with chromo domain isoform 3	gDNA.Hs.107374.0.A1	702133	MmugDNA.28393.1	203.3	229.36	171.76	194.2	655.51	290.85	971.08	3.2	1.51	2825.61	2385.6	2264.2	203.3	229.36	171.76	194.2	-12.47	-10.46	7.835	5.985
MmuSTS.1030.1.S1_at	NR2F1: nuclear receptor subfamily 2, group F, member 1	51853956	700777	MmuSTS.1030.1	35.42	58.59	41.48	38.47	975.44	425.51	1421.73	21.21	9.08	329.37	193.72	248.46	35.42	58.59	41.48	38.47	-5.67	-2.87	13.44	5.975
MmuSTS.1324.1.S1_at	LOC715175: similar to deltex 3 homolog	52626978	715175	MmuSTS.1324.1	43.52	67.35	78.45	64.12	1023.58	1073.76	899.04	16	10.71	213.03	189.46	136.22	43.52	67.35	78.45	64.12	-2.83	-1.23	9.415	5.97
MmugDNA.27747.1.S1_at	MmugDNA.27747.1	gDNA.g12652704		MmugDNA.27747.1	4.26	5.67	3.2	6.95	10.07	14.71	18.41	2.92	1.36	92.56	66.69	72.63	4.26	5.67	3.2	6.95	-15.77	-10.54	9.345	5.95
MmugDNA.37639.1.S1_at	MmugDNA.37639.1	gDNA.Hs2.382158.1.A1		MmugDNA.37639.1	5.89	6.25	4.87	5.4	23.12	20.27	9.72	3.12	1.41	128.41	69.77	90.28	5.89	6.25	4.87	5.4	-17.07	-10.41	10.095	5.91
MmugDNA.34049.1.S1_at	MmugDNA.34049.1	gDNA.Hs.323079.0.S1		MmugDNA.34049.1	1.9	6.28	3.6	3.74	99.51	28.35	79.58	18.46	7.42	44.89	26.3	46.91	1.9	6.28	3.6	3.74	-10.3	-4.31	14.38	5.865
MmuSTS.1208.1.S1_at	TMLHE: trimethyllysine hydroxylase, epsilon	59676494	703711	MmuSTS.1208.1	3.3	7.06	3.74	4.13	30.37	17.58	20.86	4.92	2.75	45.94	79.82	65	3.3	7.06	3.74	4.13	-13.92	-8.73	9.42	5.74
MmugDNA.2721.1.S1_s_at	MmugDNA.2721.1	gDNA.Hs.170843.0.A1		MmugDNA.2721.1	99.97	88.17	88.56	78.19	2367.75	1175.59	1228.28	17.99	8.71	618.24	478.17	803.53	99.97	88.17	88.56	78.19	-6.95	-2.65	12.47	5.68
MmugDNA.12769.1.S1_at	LOC703086: similar to sarcolemma associated protein	gDNA.g11935052	703086	MmugDNA.12769.1	28.33	14.75	26.62	26.06	538.78	163.68	515.99	17.1	7.69	187.44	123.72	145.94	28.33	14.75	26.62	26.06	-6.42	-3.63	11.76	5.66
MmugDNA.35571.1.S1_at	LOC695905: similar to transposon-derived Buster3 transposase-like	gDNA.g11545804	695905	MmugDNA.35571.1	7.74	3.76	4.36	6.46	59.76	21.42	68.99	8.83	2.38	105.91	73.3	159.41	7.74	3.76	4.36	6.46	-20.18	-8.9	14.505	5.64
MmugDNA.23873.1.S1_at	LOC710498: hypothetical protein LOC710498	gDNA.Hs.282800.0.A1	710498	MmugDNA.23873.1	8.97	14.75	13.11	18.29	94.88	118.86	133.3	8.64	5.04	157.69	101.73	168.49	8.97	14.75	13.11	18.29	-10.48	-6.22	9.56	5.63
Mmu.6800.1.S1_at	LOC722107: similar to Mitochondrial-processing peptidase beta subunit, mitochondrial precursor (Beta-MPP) (P-52)	CO582936	722107	Mmu.6800.1	31.67	30.31	29.87	32.9	81.29	65.56	122.27	2.81	1.4	473.74	394.26	430.7	31.67	30.31	29.87	32.9	-13.86	-9.8	8.335	5.6
MmuSTS.2665.1.S1_at	LOC706360: similar to carbonic anhydrase XIV precursor	62000473	706360	MmuSTS.2665.1	1.71	3.05	3.71	5.28	130.95	51.38	57.44	23.36	9.41	15.97	13.02	8.5	1.71	3.05	3.71	5.28	-3.58	-1.77	13.47	5.59
MmugDNA.6870.1.S1_at	TAOK2: TAO kinase 2	gDNA.g4759207	707777	MmugDNA.6870.1	1	4.29	1.88	3.61	48.29	13.47	62.06	16.4	5.45	45.45	20.72	36.56	1	4.29	1.88	3.61	-13.09	-5.64	14.745	5.545
MmugDNA.4582.1.S1_at	GREM2: similar to Gremlin-2 precursor (Cysteine knot superfamily 1, BMP antagonist 2) (Protein related to DAN and cerberus)	gDNA.Hs.52170.0.A1	708280	MmugDNA.4582.1	12.24	18.22	20.16	14.85	76.91	37.49	85.87	4.01	1.65	330.48	238.42	363.51	12.24	18.22	20.16	14.85	-19.08	-9.41	11.545	5.53
MmugDNA.7643.1.S1_at	LOC714868: similar to SH3 multiple domains 1	gDNA.Hs.173448.1.S1	714868	MmugDNA.7643.1	48.92	41.61	48.54	47.3	606.41	314.63	377.4	8.95	4.29	885.86	1688.09	378.91	48.92	41.61	48.54	47.3	-20.99	-6.75	14.97	5.52
MmugDNA.19752.1.S1_at	LOC722912: similar to forkhead box F2	gDNA.g4557594	722912	MmugDNA.19752.1	17.51	15.43	21.4	12.99	213.3	134.86	283.75	12.47	6.61	165.24	113.76	161.32	17.51	15.43	21.4	12.99	-8.58	-4.39	10.525	5.5
MmugDNA.38206.1.S1_at	MmugDNA.38206.1	gDNA.Hs.60257.0.S1		MmugDNA.38206.1	6.82	5.73	7.29	7.84	105.17	38.79	121.29	12.12	3.77	162.93	96.56	79.41	6.82	5.73	7.29	7.84	-15.88	-7.05	14	5.41
MmugDNA.21865.1.S1_at	LOC709875: similar to Pterin-4-alpha-carbinolamine dehydratase (PHS) (4-alpha-hydroxy-tetrahydropterin dehydratase) (Phenylalanine hydroxylase-stimulating protein) (Pterin carbinolamine dehydratase) (PCD) (Dimerization cofactor of hepatocyte nuclear factor 1-...	gDNA.g4557830	709875	MmugDNA.21865.1	14.98	24.75	19.18	14.97	647.48	65.29	469.3	21.35	5.52	190.8	141.23	187.77	14.98	24.75	19.18	14.97	-9.3	-5.3	15.325	5.41
MmugDNA.22545.1.S1_at	TRIM8: tripartite motif-containing 8	gDNA.g13569865	713701	MmugDNA.22545.1	99.39	156.78	173.95	148.1	2139.58	825.47	2558.81	12.57	6.45	981.1	945.78	718.79	99.39	156.78	173.95	148.1	-6.01	-4.34	9.29	5.395
Mmu.11416.1.S1_at	LOC701627: similar to T-cell receptor beta chain V region YT35 precursor	U04592.1	701627	Mmu.11416.1	1.39	1.35	1.12	3.1	43.22	50.73	19.17	20.47	8.28	16.62	12.33	15.87	1.39	1.35	1.12	3.1	-7.85	-2.49	14.16	5.385
MmugDNA.32119.1.S1_at	ME1: cytosolic malic enzyme 1	gDNA.g1322012	694739	MmugDNA.32119.1	11.11	31.92	13.51	12.72	492.8	155.73	202.98	18.41	5.01	144.38	306.8	266.75	11.11	31.92	13.51	12.72	-15.46	-5.67	16.935	5.34
MmuSTS.4725.1.S1_at	MmuSTS.4725.1	60301510		MmuSTS.4725.1	79.26	71.89	76.8	92.23	1550.29	575.78	1035.65	13.22	7.21	354.27	719.55	401.24	79.26	71.89	76.8	92.23	-6.2	-3.44	9.71	5.325
MmugDNA.11410.1.S1_at	LOC715828: similar to WW domain-containing adapter with a coiled-coil region isoform 1	gDNA.Hs.70333.0.S1	715828	MmugDNA.11410.1	199.4	262.66	236.57	242.49	4981.94	1729.86	5308.95	17.01	8.81	974.55	611.87	666.29	199.4	262.66	236.57	242.49	-3.1	-1.83	10.055	5.32
MmugDNA.17946.1.S1_s_at	LOC695170: similar to bicaudal D homolog 1 isoform 1	gDNA.Hs2.164975.3.A1	695170	MmugDNA.17946.1	33.27	17.84	9.57	20.42	248.07	301.02	171.95	11.82	6.98	122.1	98.06	151.45	33.27	17.84	9.57	20.42	-6.05	-3.61	8.935	5.295
MmugDNA.15496.1.S1_at	LOC697940: similar to EEED8.6	gDNA.Hs.16420.2.A1	697940	MmugDNA.15496.1	2.82	2.94	4.74	4	60.93	61.5	128.79	22.43	8.03	15.56	23.96	23.07	2.82	2.94	4.74	4	-5.75	-2.5	14.09	5.265
MmugDNA.31141.1.S1_at	MmugDNA.31141.1	gDNA.Hs.21894.0.S1		MmugDNA.31141.1	9.93	10.26	7.4	7.7	93.91	144.47	191.42	15.7	6.55	170.5	179.61	71.42	9.93	10.26	7.4	7.7	-14.91	-3.96	15.305	5.255
MmugDNA.24338.1.S1_at	JAK1: janus kinase 1	gDNA.Hs2.50651.1.S1	697808	MmugDNA.24338.1	15.83	30.28	28	21.78	822.72	206.83	241.87	17.99	3.11	317.4	331.01	383.76	15.83	30.28	28	21.78	-14.92	-7.38	16.455	5.245
MmugDNA.19298.1.S1_at	TRIM16: tripartite motif-containing 16	gDNA.g5453643	694439	MmugDNA.19298.1	21.39	29.92	27	18.93	320.45	263.66	206.55	10.75	7.49	122.55	124.75	151.58	21.39	29.92	27	18.93	-5.43	-2.9	8.09	5.195
MmugDNA.9650.1.S1_at	LOC714914: similar to deltex 3-like	gDNA.Hs.16331.0.S1	714914	MmugDNA.9650.1	10.92	19.8	4.17	6.27	184.48	53.8	161.3	12.89	4.76	105.96	148.52	113.73	10.92	19.8	4.17	6.27	-11.89	-5.52	12.39	5.14
MmugDNA.28462.1.S1_at	LOC715367: similar to Fos-related antigen 1 (FRA-1)	gDNA.Hs.283565.0.A2	715367	MmugDNA.28462.1	18.34	17.05	16.88	20.34	169.18	19.92	198.25	6.83	1.37	228.7	225.15	341.94	18.34	17.05	16.88	20.34	-14.27	-8.88	10.55	5.125
MmugDNA.3232.1.S1_at	GALNTL1: UDP-N-acetyl-alpha-D-galactosamine:polypeptide N-acetylgalactosaminyltransferase-like 1	gDNA.Hs.21035.0.S1	714574	MmugDNA.3232.1	8.41	9.51	12.25	7.24	256.97	59.26	111.94	15.42	4.5	95.52	83.14	212.27	8.41	9.51	12.25	7.24	-14.05	-5.74	14.735	5.12
MmugDNA.11430.1.S1_at	LOC710690: similar to dedicator of cytokinesis 11	gDNA.Hs.107513.0.A1	710690	MmugDNA.11430.1	22.39	14.87	26.7	20.32	196.92	215.14	179.24	9.52	5.58	203.59	168.76	216.26	22.39	14.87	26.7	20.32	-9.46	-4.66	9.49	5.12
MmugDNA.16170.1.S1_s_at	LOC712552: similar to MIR-interacting saposin-like protein precursor (Transmembrane protein 4) (Putative secreted protein ZSIG9)	gDNA.g7657175	712552	MmugDNA.16170.1	230.93	107.79	103.21	198.76	1137.33	254.75	1086.46	4.91	1.31	1879.82	2139.93	1975.88	230.93	107.79	103.21	198.76	-12.56	-8.91	8.735	5.11
MmuSTS.2588.1.S1_at	DPYSL3: dihydropyrimidinase-like 3	60301209	708425	MmuSTS.2588.1	51.33	40.97	60.81	48.32	115.72	91.25	144.35	2.35	1.25	633.13	565.13	655.74	51.33	40.97	60.81	48.32	-12.33	-8.96	7.34	5.105
MmugDNA.22198.1.S1_s_at	LOC699288: similar to Neutral amino acid transporter A (SATT) (Alanine/serine/cysteine/ threonine transporter) (ASCT1)	gDNA.Hs.286049.2.S1	699288	MmugDNA.22198.1	33.7	21.23	40.09	43.35	401.9	212.23	194.96	7.94	3.96	302.19	464.14	322.68	33.7	21.23	40.09	43.35	-10.6	-6.24	9.27	5.1
MmugDNA.33403.1.S1_at	LOC695359: similar to WD repeat and SOCS box-containing protein 2 (WSB-2) (CS box-containing WD protein)	gDNA.g8923880	695359	MmugDNA.33403.1	260.47	277.92	247.19	249.95	1965.24	1129.29	2095.8	6.53	3.95	2135.76	2056.89	2237.58	260.47	277.92	247.19	249.95	-8.28	-6.25	7.405	5.1
MmugDNA.39344.1.S1_at	NR2F2: nuclear receptor subfamily 2, group F, member 2	gDNA.g179023	707483	MmugDNA.39344.1	46.34	30.47	50.86	33.12	1073.83	172.65	1540.49	23.17	6.47	265.01	179.67	231.66	46.34	30.47	50.86	33.12	-5.57	-3.68	14.37	5.075
MmugDNA.27836.1.S1_at	LOC709802: similar to plexin B1	gDNA.Hs.278311.1.S1	709802	MmugDNA.27836.1	2.45	4.94	5.29	6.2	81.93	128.98	38.2	17.84	6.86	31.09	28.64	27.2	2.45	4.94	5.29	6.2	-6.25	-3.26	12.045	5.06
MmugDNA.16573.1.S1_s_at	SAT: similar to Diamine acetyltransferase 1 (Spermidine/spermine N(1)-acetyltransferase 1) (SSAT) (SSAT-1) (Putrescine acetyltransferase) (Polyamine N-acetyltransferase 1)	gDNA.g338335	697884	MmugDNA.16573.1	460.73	139.36	294.25	410.38	1909.12	1076.86	2646.22	5.75	3.07	3683.71	3616.92	2870.38	460.73	139.36	294.25	410.38	-10.39	-6.97	8.07	5.02
MmugDNA.17727.1.S1_at	MBTPS2: membrane-bound transcription factor protease, site 2	gDNA.g7706692	696540	MmugDNA.17727.1	8.45	6.81	10.54	8.82	107.19	202.55	88.29	15.81	5.59	83.48	85.17	98.33	8.45	6.81	10.54	8.82	-10.34	-4.45	13.075	5.02
MmuSTS.187.1.S1_at	LOC716256: similar to WD repeat domain 32	59676320	716256	MmuSTS.187.1	44.74	26.69	43.48	37.57	236.97	209.7	305.67	6.42	4.22	354.64	357.04	284.71	44.74	26.69	43.48	37.57	-8.44	-5.77	7.43	4.995
Mmu.10122.1.S1_at	LOC708080: similar to Cathepsin S precursor	CB551643	708080	Mmu.10122.1	2.95	1	1.22	3.72	45.18	51.5	21.11	19.46	7.07	14.97	22.95	19.73	2.95	1	1.22	3.72	-9.53	-2.91	14.495	4.99
MmuSTS.3317.1.S1_at	MCP-1: chemokine CCL2/MCP-1	47776440	574138	MmuSTS.3317.1	2.78	3.55	4.7	3.47	71.4	8.65	66.46	13.62	3.27	81.52	226.64	58.41	2.78	3.55	4.7	3.47	-34.02	-6.67	23.82	4.97
MmugDNA.34401.1.S1_at	MmugDNA.34401.1	gDNA.Hs.106932.0.A1		MmugDNA.34401.1	3.7	4.57	2.61	2.18	22.97	32.62	12.44	6.74	2.23	68.11	24.37	65.53	3.7	4.57	2.61	2.18	-16.66	-7.67	11.7	4.95
MmugDNA.7200.1.S1_at	LOC722628: similar to UPF0184 protein C9orf16 homolog	gDNA.Hs.95867.1.S1	722628	MmugDNA.7200.1	1	2.11	1	1	101.78	197.63	62.61	85.55	5.75	53.09	78.48	68.19	1	2.11	1	1	-48.11	-4.11	66.83	4.93
MmugDNA.10995.1.S1_at	LOC711448: similar to R3H domain-containing protein 2	gDNA.g7662441	711448	MmugDNA.10995.1	207.46	205.54	204.48	115.89	2127.89	1972.76	3271.76	13.94	8.42	502.65	707.67	464.95	207.46	205.54	204.48	115.89	-3.05	-1.44	8.495	4.93
MmuSTS.1843.1.S1_at	LOC701524: similar to zinc finger homeodomain 4	55167875	701524	MmuSTS.1843.1	28.3	27.42	29.35	28.66	117.1	114.94	179.39	4.55	2.08	370.01	274.26	267.7	28.3	27.42	29.35	28.66	-10.67	-7.75	7.61	4.915
Mmu.11960.1.S1_x_at	GBP1: guanylate binding protein 1, interferon-inducible, 67kD	CO648604	694538	Mmu.11960.1	3.58	1.22	1.71	6.44	46.22	82.81	70.47	22.99	8.2	18.49	47.8	34.74	3.58	1.22	1.71	6.44	-10.62	-1.61	16.805	4.905
MmugDNA.38236.1.S1_at	LOC699884: similar to aspartate beta-hydroxylase isoform b	gDNA.Hs.332422.0.S2	699884	MmugDNA.38236.1	4.44	4.72	3.95	4.91	12.53	14.39	8.41	2.52	1.24	67.3	55.86	59.12	4.44	4.72	3.95	4.91	-13.26	-8.53	7.89	4.885
MmugDNA.39376.1.S1_at	MmugDNA.39376.1	gDNA.g5454007		MmugDNA.39376.1	3.72	5.18	5.5	10.17	36.34	19.25	27.69	4.69	2.51	52.49	81.95	72.23	3.72	5.18	5.5	10.17	-11.6	-7.26	8.145	4.885
MmugDNA.4534.1.S1_at	MmugDNA.4534.1	gDNA.Hs.7968.0.A1		MmugDNA.4534.1	6.73	9.43	13.62	16.15	161.43	88.51	85.36	10.27	5.38	77.43	76.34	78.05	6.73	9.43	13.62	16.15	-7.08	-4.34	8.675	4.86
MmugDNA.40119.1.S1_s_at	LOC701908: similar to HIV-1 Tat interactive protein 2, 30kDa	gDNA.g5454125	701908	MmugDNA.40119.1	29.82	28.52	39.73	31.97	180.33	113.43	98.02	3.76	1.56	392.57	429.4	336.49	29.82	28.52	39.73	31.97	-11.74	-8.15	7.75	4.855
MmugDNA.9039.1.S1_at	MmugDNA.9039.1	gDNA.Hs.64001.0.S1		MmugDNA.9039.1	53.88	6.36	7.25	11.07	192.35	173.03	322.02	11.36	4.88	192.82	289.82	211.73	53.88	6.36	7.25	11.07	-11.41	-4.83	11.385	4.855
MmugDNA.14209.1.S1_at	LOC713285: similar to serine dehydratase	gDNA.g5803160	713285	MmugDNA.14209.1	8.75	9.08	14.47	14.54	128.96	219.41	99.8	12.62	6.19	80.85	96.55	48.33	8.75	9.08	14.47	14.54	-6.34	-3.48	9.48	4.835
MmugDNA.14702.1.S1_at	MmugDNA.14702.1	gDNA.g13259523		MmugDNA.14702.1	45.63	37.63	48.31	43.88	718.6	388.07	854.69	14.87	7.22	292.33	293.05	207.44	45.63	37.63	48.31	43.88	-5.99	-2.44	10.43	4.83
Mmu.16393.1.S1_at	BIRC3: baculoviral IAP repeat-containing protein 3	CO648762	702468	Mmu.16393.1	5.11	4.45	3.92	6.28	38.25	27.36	33.97	6.76	3.04	71.16	54.81	63.96	5.11	4.45	3.92	6.28	-13.22	-6.5	9.99	4.77
MmuSTS.2821.1.S1_at	LOC702033: similar to leupaxin	60301298	702033	MmuSTS.2821.1	30.96	34.71	25.32	24.15	389.59	292.76	306.14	11.78	7.1	483.67	237.38	483.58	30.96	34.71	25.32	24.15	-13.19	-2.43	12.485	4.765
MmugDNA.37855.1.S1_at	MmugDNA.37855.1	gDNA.Hs.307134.0.S1		MmugDNA.37855.1	4.57	4.16	3.88	4.4	46.28	48.47	80.76	13.39	5.79	32.12	26.46	21.39	4.57	4.16	3.88	4.4	-6.39	-3.7	9.89	4.745
MmugDNA.6894.1.S1_at	LOC713540: hypothetical protein LOC713540	gDNA.Hs.154897.0.A1	713540	MmugDNA.6894.1	4.94	5.02	2.85	10.88	96.03	122.61	49.69	15.17	6.72	25.08	36.93	32.27	4.94	5.02	2.85	10.88	-5.28	-2.74	10.225	4.73
MmugDNA.41855.1.S1_at	CLIC4: chloride intracellular channel 4	gDNA.Hs.25035.1.A1	712337	MmugDNA.41855.1	176.86	109.15	126.5	134.48	1179.23	384.54	1043.7	6.34	2.71	1094.14	1719.32	1843.74	176.86	109.15	126.5	134.48	-11.5	-6.72	8.92	4.715
MmugDNA.22829.1.S1_at	LOC716452: similar to Transcription factor AP-1 (Activator protein 1) (AP1) (Proto-oncogene c-jun) (V-jun avian sarcoma virus 17 oncogene homolog) (Jun A) (AH119)	gDNA.g12803622	716452	MmugDNA.22829.1	41.12	19.1	21.95	14.26	621.1	143.94	546.48	17.56	6.82	334.7	74.84	172.73	41.12	19.1	21.95	14.26	-7.86	-2.55	12.71	4.685
MmugDNA.37601.1.S1_at	STOM: stomatin	gDNA.Hs.160483.0.S2	699584	MmugDNA.37601.1	7.54	4.97	9.41	4.99	115.32	20.39	165.7	15.01	4.24	66.34	76.42	49.51	7.54	4.97	9.41	4.99	-9.32	-5.11	12.165	4.675
MmugDNA.13980.1.S1_at	LOC709102: similar to plasma membrane calcium ATPase 1 isoform 1b	gDNA.Hs.78546.2.A1	709102	MmugDNA.13980.1	174.23	182.42	192.7	165.15	2598.57	1681.58	2519.12	12.64	6.88	1015.39	1221.36	953.88	174.23	182.42	192.7	165.15	-5.93	-2.46	9.285	4.67
MmugDNA.22671.1.S1_at	LOC706751: similar to Eukaryotic translation initiation factor 4E (eIF4E) (eIF-4E) (mRNA cap-binding protein) (eIF-4F 25 kDa subunit)	gDNA.Hs.79306.0.A1	706751	MmugDNA.22671.1	310.04	172.18	167.97	259.8	2547.52	1634.4	3179.22	11.16	7.01	1020.56	659.44	913.37	310.04	172.18	167.97	259.8	-3.85	-2.32	7.505	4.665
MmugDNA.10262.1.S1_at	LOC696084: similar to human immunodeficiency virus type I enhancer binding protein 3	gDNA.g13375633	696084	MmugDNA.10262.1	2.63	1	1.08	2.82	72.99	16.65	40.28	24.27	7.37	11.55	5.25	10.42	2.63	1	1.08	2.82	-4.94	-1.95	14.605	4.66
MmugDNA.19319.1.S1_at	MmugDNA.19319.1	gDNA.Hs.293696.0.S1		MmugDNA.19319.1	9.37	3.7	10.29	3.87	25.39	141.77	129.87	14.36	4.18	76.55	62.83	72.17	9.37	3.7	10.29	3.87	-10.35	-5.13	12.355	4.655
MmugDNA.11351.1.S1_at	CRYGC: gammaC-crystallin	gDNA.g13377000	709553	MmugDNA.11351.1	11.96	11.95	9.96	11.11	126.33	174.67	123.77	12.48	7.84	22.94	22.24	33.18	11.96	11.95	9.96	11.11	-2.3	-1.4	7.39	4.62
MmugDNA.4215.1.S1_at	LOC705989: similar to matrix-remodelling associated 8	gDNA.Hs.59384.1.A1	705989	MmugDNA.4215.1	77.22	79.43	78.22	80.19	899.47	611.92	523.31	8.38	5.17	631.72	1286.69	424.07	77.22	79.43	78.22	80.19	-9.83	-4	9.105	4.585
MmugDNA.8617.1.S1_at	MmugDNA.8617.1	gDNA.g7662111		MmugDNA.8617.1	13.47	15.7	13.02	10.97	39.97	42.42	47.92	3.22	1.7	180.63	140.22	130.65	13.47	15.7	13.02	10.97	-11.26	-7.47	7.24	4.585
MmugDNA.26146.1.S1_at	FAM50A: similar to Protein FAM50A (XAP-5 protein) (HXC-26 protein)	gDNA.g4758219	700266	MmugDNA.26146.1	93.19	54.86	29.13	65.59	1203.2	468.63	1158.25	17.02	7.45	267.06	204.96	235.94	93.19	54.86	29.13	65.59	-4.17	-1.63	10.595	4.54
MmugDNA.30221.1.S1_at	LOC707870: similar to insulin receptor substrate 1	gDNA.Hs.43845.0.A1	707870	MmugDNA.30221.1	1	1	1.15	1.19	10.35	13.16	10.93	10.86	3.97	24.87	10.17	13.33	1	1	1.15	1.19	-14.83	-5.08	12.845	4.525
MmugDNA.32625.1.S1_at	LOC700559: similar to enabled homolog isoform b	gDNA.Hs.14838.0.S3	700559	MmugDNA.32625.1	4.48	10.02	13.85	4.37	43.71	35.88	38.25	5.2	2.34	106.15	96.22	76.58	4.48	10.02	13.85	4.37	-12.41	-6.64	8.805	4.49
MmugDNA.42575.1.S1_at	MmugDNA.42575.1	gDNA.Hs.116051.0.A1		MmugDNA.42575.1	6.35	4.75	4.8	3.49	34.72	45.01	62.22	9.62	4.64	57.02	25.53	69.61	6.35	4.75	4.8	3.49	-10.2	-4.34	9.91	4.49
MmugDNA.38270.1.S1_at	LOC711475: similar to actin-related protein M2	gDNA.Hs.236635.0.A1	711475	MmugDNA.38270.1	18.69	16.97	21.55	27.07	406.65	245.47	211.61	13.41	7.71	51.86	50.56	49.13	18.69	16.97	21.55	27.07	-2.36	-1.25	7.885	4.48
MmuSTS.3200.1.S1_at	MmuSTS.3200.1	47776411		MmuSTS.3200.1	47.37	48.28	54.12	36.7	697.4	416.67	369.83	10.69	6.29	220.6	223.86	189.38	47.37	48.28	54.12	36.7	-4.59	-2.62	7.64	4.455
MmugDNA.7749.1.S1_at	LOC702103: similar to Sprouty homolog 2 (Spry-2)	gDNA.g5032114	702103	MmugDNA.7749.1	43.27	45.27	41.63	73.76	474.86	91.25	660.24	7.76	1.91	1610.41	562.26	622.05	43.27	45.27	41.63	73.76	-18.16	-7	12.96	4.455
MmugDNA.26860.1.S1_at	MmugDNA.26860.1	gDNA.Hs.171480.0.A1		MmugDNA.26860.1	6.38	5.22	6.43	5.85	111.04	67.22	108.86	15.95	7.61	21.82	14	20.42	6.38	5.22	6.43	5.85	-3.04	-1.29	9.495	4.45
MmuSTS.2042.1.S1_at	MmuSTS.2042.1	62000310		MmuSTS.2042.1	10.42	13.01	7.64	8.18	43.27	64.8	55.85	5.57	3.24	86.95	64.63	115.77	10.42	13.01	7.64	8.18	-9.2	-5.65	7.385	4.445
MmugDNA.11157.1.S1_at	LOC719689: similar to UDP-GlcNAc:betaGal beta-1,3-N-acetylglucosaminyltransferase-like 1	gDNA.Hs.91375.0.S1	719689	MmugDNA.11157.1	4.26	4.7	4.36	6.4	68.15	174	68.02	21.52	7.32	17.1	19.85	27.96	4.26	4.7	4.36	6.4	-4.35	-1.55	12.935	4.435
MmugDNA.36366.1.S1_at	SUMO3: similar to Small ubiquitin-related modifier 3 precursor (SUMO-3) (Ubiquitin-like protein SMT3A) (SMT3 homolog 1)	gDNA.Hs.85119.0.A1	717501	MmugDNA.36366.1	33.21	34.18	50.63	51.45	156.8	110.77	194.12	3.75	2.23	318.76	397.52	417.43	33.21	34.18	50.63	51.45	-8.99	-6.63	6.37	4.43
MmugDNA.21451.1.S1_at	MmugDNA.21451.1	gDNA.Hs.32468.0.A1		MmugDNA.21451.1	3.9	4.05	4.81	1.31	24	7.88	27.01	5.55	1.43	60.04	56.97	28.74	3.9	4.05	4.81	1.31	-14.94	-7.4	10.245	4.415
MmugDNA.40928.1.S1_at	LOC717725: similar to Cip1-interacting zinc finger protein	gDNA.g7188807	717725	MmugDNA.40928.1	7	2.55	4.77	3.91	62.19	11.27	37.15	8.05	2.22	64.04	62.67	76.64	7	2.55	4.77	3.91	-14.81	-6.59	11.43	4.405
Mmu.9543.1.S1_at	TES: testin	BM423077	706879	Mmu.9543.1	48.27	48.37	63.76	65.55	1534.66	342.57	1413.82	19.62	7.45	185.3	152.72	235.79	48.27	48.37	63.76	65.55	-3.35	-1.33	11.485	4.39
MmugDNA.33261.1.S1_at	LOC703456: similar to integrin, alpha 1 precursor	gDNA.Hs.184411.5.S1	703456	MmugDNA.33261.1	9.49	7.9	7.16	6.24	95.02	57.44	57.21	8.67	3.85	166.48	42.45	114.04	9.49	7.9	7.16	6.24	-13.47	-4.92	11.07	4.385
MmugDNA.21024.1.S1_at	MmugDNA.21024.1	gDNA.Hs.126101.0.A1		MmugDNA.21024.1	12.67	2.92	8.03	5.19	124.34	57.93	139.38	16.29	7.13	16.61	23.83	27.98	12.67	2.92	8.03	5.19	-3.41	-1.6	9.85	4.365
Mmu.3500.1.S1_at	LOC701422: similar to activity-dependent neuroprotector	CN646840	701422	Mmu.3500.1	15.46	23.96	20.74	26.98	542.63	146.99	341.38	15.89	6.31	137.38	78.61	121.57	15.46	23.96	20.74	26.98	-5.05	-2.39	10.47	4.35
MmugDNA.6484.1.S1_at	LOC717555: similar to eukaryotic translation initiation factor 4 gamma, 3	gDNA.Hs.25732.0.A1	717555	MmugDNA.6484.1	230.1	183.26	199.98	179.3	1515.13	160.84	1127.56	4.68	1.24	1956.85	2075.08	1574.73	230.1	183.26	199.98	179.3	-9.41	-7.45	7.045	4.345
MmugDNA.41485.1.S1_at	LOC717169: similar to SLIT-ROBO Rho GTPase-activating protein 1	gDNA.Hs2.400041.1.S1	717169	MmugDNA.41485.1	9.26	20.94	29.79	12.42	279.95	139.59	120.49	9.96	4.77	103.08	144.93	105.91	9.26	20.94	29.79	12.42	-6.65	-3.88	8.305	4.325
Mmu.12305.1.S1_at	LOC721852: similar to RAB1B, member RAS oncogene family	CO579052	721852	Mmu.12305.1	29.95	38.93	54.94	44.46	198.07	197.48	139.74	4.25	1.98	392.62	318.96	522.09	29.95	38.93	54.94	44.46	-9.95	-6.63	7.1	4.305
MmugDNA.10434.1.S1_at	LOC693306: similar to family with sequence similarity 46, member A	gDNA.Hs.10784.3.S1	693306	MmugDNA.10434.1	367.46	128.64	362.7	322.41	2643.04	856.61	3023.61	7.43	3.45	2052.22	2300.59	1998.21	367.46	128.64	362.7	322.41	-7.17	-5.14	7.3	4.295
MmugDNA.23271.1.S1_at	LOC694403: similar to RAB1B, member RAS oncogene family	gDNA.g13569961	694403	MmugDNA.23271.1	88.84	94.03	103.33	105.14	1608.58	968.32	1288.06	13.22	6.66	339.02	381.38	388.1	88.84	94.03	103.33	105.14	-3.78	-1.92	8.5	4.29
MmugDNA.36778.1.S1_at	LOC712844: similar to ADAMTS-like 3	gDNA.Hs.217297.0.A1	712844	MmugDNA.36778.1	20.63	59.45	62.71	43.81	228.97	166.52	217.52	4.42	2.29	413.61	746.14	410.14	20.63	59.45	62.71	43.81	-11.38	-6.28	7.9	4.285
MmugDNA.30393.1.S1_at	ENC1: ectodermal-neural cortex (with BTB-like domain)	gDNA.g2415303	704577	MmugDNA.30393.1	34.98	13.21	12.21	8.91	1051.06	19.26	695.97	34.16	5.16	192.97	126.8	159.51	34.98	13.21	12.21	8.91	-8.89	-3.4	21.525	4.28
Mmu.15062.1.S1_at	RASA1: RAS p21 protein activator 1	CN804811	694085	Mmu.15062.1	18.19	39.58	65.47	51.91	1002.08	344.31	745.01	16.57	6.49	284.08	240.71	246.46	18.19	39.58	65.47	51.91	-6.19	-2.06	11.38	4.275
MmugDNA.4587.1.S1_at	LOC712161: similar to Transcription factor E3	gDNA.Hs2.433687.1.S1	712161	MmugDNA.4587.1	7.98	13.79	19.39	19.43	121.64	127.2	180.61	9.89	6.37	51.19	50.24	59.78	7.98	13.79	19.39	19.43	-3.68	-2.14	6.785	4.255
MmugDNA.1103.1.S1_at	LOC697097: similar to muscleblind-like 2 isoform 1	gDNA.g9665257	697097	MmugDNA.1103.1	31.42	40.79	45.45	39.62	776.95	74.06	724.86	13.35	3.2	538.04	434.7	436.38	31.42	40.79	45.45	39.62	-12.07	-5.29	12.71	4.245
MmugDNA.16138.1.S1_at	LOC705346: similar to zinc finger protein 12 (KOX 3)	gDNA.g7706464	705346	MmugDNA.16138.1	40.62	41.87	61.09	56.44	650.55	472.36	383.26	10.25	6.37	270.98	186.54	171.1	40.62	41.87	61.09	56.44	-4.17	-2.12	7.21	4.245
MmuSTS.1378.1.S1_at	BDNF: brain-derived neurotrophic factor	49533074	701245	MmuSTS.1378.1	121.54	155.43	259.53	186.44	2347.44	772.52	1451.62	8.54	4.14	1290.02	1194.85	892.15	121.54	155.43	259.53	186.44	-6.36	-4.34	7.45	4.24
MmugDNA.26642.1.S1_at	ANK2: ankyrin 2	gDNA.Hs.117970.0.S2	702180	MmugDNA.26642.1	7.88	15.16	7.53	16.21	280.39	75.78	257.39	19	6.49	65.76	59.23	88.22	7.88	15.16	7.53	16.21	-6.5	-1.99	12.75	4.24
Mmu.3343.2.S1_at	MORF4L2: similar to Mortality factor 4-like protein 2 (MORF-related gene X protein) (Transcription factor-like protein MRGX) (MSL3-2 protein)	CO648016	697637	Mmu.3343.2	109.76	79.55	72.28	96.55	364.91	297.9	222.44	3.29	1.77	1019.88	932.7	720.21	109.76	79.55	72.28	96.55	-10.14	-6.65	6.715	4.21
MmugDNA.37869.1.S1_at	MmugDNA.37869.1	gDNA.Hs.87597.0.A1		MmugDNA.37869.1	3.33	5.11	7.42	3.66	32.04	25.96	17.36	5.25	2.03	72.52	56.85	40.57	3.33	5.11	7.42	3.66	-12.07	-6.37	8.66	4.2
MmugDNA.18508.1.S1_at	LOC700635: similar to protein tyrosine phosphatase-like, member A	gDNA.g7657481	700635	MmugDNA.18508.1	7.61	7.24	5.28	6.44	256.96	51.42	99.26	20.5	4	74.48	72.9	139.05	7.61	7.24	5.28	6.44	-14.14	-4.38	17.32	4.19
MmugDNA.13612.1.S1_at	LOC714025: hypothetical protein LOC714025	gDNA.Hs.32244.0.A1	714025	MmugDNA.13612.1	5.32	6.55	4.76	2.7	131.59	26.65	52.91	15.76	3.44	50.57	57.11	41.71	5.32	6.55	4.76	2.7	-10.8	-4.9	13.28	4.17
MmugDNA.32434.1.S1_at	LOC718958: hypothetical protein LOC718958	gDNA.Hs.227806.0.S1	718958	MmugDNA.32434.1	83.61	66.68	73.18	108.7	924.56	452.68	870.21	9.17	5.43	605.39	431.18	402.18	83.61	66.68	73.18	108.7	-5.74	-2.91	7.455	4.17
MmugDNA.21347.1.S1_s_at	LOC719857: similar to DNA-directed RNA polymerase II subunit J (DNA-directed RNA polymerase II 13.3 kDa polypeptide) (RPB11)	gDNA.Hs.80475.1.S1	719857	MmugDNA.21347.1	393.61	277.97	203.51	343.54	4251.37	2004.17	4435.23	12.15	6.7	882.84	780.99	939.37	393.61	277.97	203.51	343.54	-2.94	-1.64	7.545	4.17
MmugDNA.2229.1.S1_at	MmugDNA.2229.1	gDNA.Hs.107216.0.A1		MmugDNA.2229.1	7.75	6.8	8.81	7.98	26.95	30.54	21.29	3.53	1.45	100.29	107.86	92.03	7.75	6.8	8.81	7.98	-12.97	-6.85	8.25	4.15
MmuSTS.4260.1.S1_at	LOC708907: similar to dual specificity phosphatase 6 isoform a	51853748	708907	MmuSTS.4260.1	74.91	29.77	29.95	39.51	110.4	66.7	129.58	2.61	1.29	1322.93	515.61	468.74	74.91	29.77	29.95	39.51	-18.66	-6.96	10.635	4.125
MmugDNA.18058.1.S1_at	MmugDNA.18058.1	gDNA.Hs.12270.0.A1		MmugDNA.18058.1	21.8	9.85	15.33	13.92	217.66	482.1	163.22	19.36	5.29	106.13	154.61	160.23	21.8	9.85	15.33	13.92	-9.52	-2.95	14.44	4.12
MmugDNA.26399.1.S1_at	LOC719101: similar to AKT1 substrate 1 (proline-rich)	gDNA.Hs2.94814.3.S1	719101	MmugDNA.26399.1	17.68	32.11	16.09	23.42	172.37	114.98	391.24	10.26	3.81	135.33	123.9	142.85	17.68	32.11	16.09	23.42	-6.07	-4.42	8.165	4.115
MmugDNA.23835.1.S1_at	MmugDNA.23835.1	gDNA.g9801844		MmugDNA.23835.1	22.52	26.5	34.9	23.49	248.4	233.82	180.4	8.13	5.63	157.16	278.48	114.55	22.52	26.5	34.9	23.49	-6.66	-2.6	7.395	4.115
MmugDNA.19209.1.S1_s_at	LOC697208: similar to Neutrophil gelatinase-associated lipocalin precursor (NGAL) (p25) (25 kDa alpha-2-microglobulin-related subunit of MMP-9) (Lipocalin-2) (Oncogene 24p3)	gDNA.Hs.204238.0.S1	697208	MmugDNA.19209.1	16.32	5.12	11.28	5.58	54.04	57.33	59.98	6.22	3.54	135.46	73.42	69.3	16.32	5.12	11.28	5.58	-9.88	-4.63	8.05	4.085
MmugDNA.31522.1.S1_s_at	STRN3: nuclear autoantigen	gDNA.Hs.183105.1.S1	717081	MmugDNA.31522.1	40.15	50.36	51.64	58.76	673.69	105.65	562.02	8.74	2.73	499.91	456.4	365.44	40.15	50.36	51.64	58.76	-8.6	-5.4	8.67	4.065
MmugDNA.30412.1.S1_at	GSDMDC1: similar to Gasdermin domain-containing protein 1	gDNA.g13376057	697137	MmugDNA.30412.1	33.4	17.31	26.86	34.65	186.21	226.59	210.7	7.45	4.52	125.42	202.96	203.22	33.4	17.31	26.86	34.65	-6.29	-3.57	6.87	4.045
MmuSTS.1412.1.S1_at	SK3: small-conductance calcium-activated potassium channel	47776819	574397	MmuSTS.1412.1	7.22	6.3	6.06	9.59	422.32	36.36	392.71	38.1	6.21	36.43	10.8	37.46	7.22	6.3	6.06	9.59	-3.96	-1.8	21.03	4.005
MmugDNA.10135.1.S1_at	LOC697993: similar to poly (ADP-ribose) polymerase family, member 16	gDNA.Hs.8694.1.A1	697993	MmugDNA.10135.1	8	5.95	8.28	5.02	91.41	195.64	212.02	23.2	6.22	32.76	24	32.12	8	5.95	8.28	5.02	-4.37	-1.78	13.785	4
MmugDNA.20151.1.S1_at	RYK: RYK receptor-like tyrosine kinase	gDNA.Hs.79350.1.S1	718950	MmugDNA.20151.1	33.26	37.55	37.09	35.71	334.55	121.31	176.68	5.82	2.71	406.75	354.97	407.46	33.26	37.55	37.09	35.71	-10.79	-5.26	8.305	3.985
MmugDNA.5402.1.S1_at	LOC705302: similar to calcium/calmodulin-dependent protein kinase II inhibitor 1	gDNA.Hs.197922.0.A1	705302	MmugDNA.5402.1	22.97	12.46	46.05	26.82	160.91	271.14	205.57	8.05	4.59	182.13	128.23	197.52	22.97	12.46	46.05	26.82	-6.23	-3.36	7.14	3.975
MmuSTS.1811.1.S1_at	LOC715803: similar to SNF related kinase	55167842	715803	MmuSTS.1811.1	189.78	250.66	254.59	239.23	2785.3	1200.95	3183.8	10.33	5.54	1231.63	1161.43	636.45	189.78	250.66	254.59	239.23	-4.28	-2.4	7.305	3.97
MmugDNA.25731.1.S1_at	LOC707540: similar to transforming growth factor, beta 2	gDNA.Hs.169300.1.S1	707540	MmugDNA.25731.1	20.4	10.81	14.11	10.31	122.39	99.34	53.14	6.4	3.43	100.34	134.1	82.18	20.4	10.81	14.11	10.31	-7.4	-4.5	6.9	3.965
MmugDNA.8216.1.S1_at	THAP3: similar to THAP domain-containing protein 3	gDNA.Hs.26938.0.S1	704946	MmugDNA.8216.1	75.66	68.97	75.46	59.42	526.07	552.65	817.67	9.21	6.12	196.38	166.16	165.12	75.66	68.97	75.46	59.42	-2.51	-1.8	5.86	3.96
MmugDNA.37808.1.S1_at	MmugDNA.37808.1	gDNA.Hs2.310420.1.S1		MmugDNA.37808.1	6.52	11.79	13.15	3.63	142.35	209.64	85.02	16.76	6.65	19.08	26.1	25.89	6.52	11.79	13.15	3.63	-2.68	-1.22	9.72	3.935
MmugDNA.40478.1.S1_at	LOC698581: similar to CG17660-PA	gDNA.Hs.23317.0.A2	698581	MmugDNA.40478.1	2.34	1.47	1	1.85	14.92	3.39	19.28	7.91	2.07	44.38	35.06	35.23	2.34	1.47	1	1.85	-24.5	-5.79	16.205	3.93
MmugDNA.19057.1.S1_at	LOC705326: similar to potassium inwardly-rectifying channel J12	gDNA.Hs.200629.0.S1	705326	MmugDNA.19057.1	1.55	7.74	2.6	4.1	199.1	34.09	65.91	23.77	1.75	64.4	55.69	71.53	1.55	7.74	2.6	4.1	-15.77	-6.1	19.77	3.925
MmugDNA.4089.1.S1_at	LOC706555: similar to ubiquitin specific protease 11	gDNA.g12653164	706555	MmugDNA.4089.1	72.43	37.24	100.47	56.69	882.31	658.29	552.53	10.83	6.53	157.95	200.26	189.89	72.43	37.24	100.47	56.69	-2.79	-1.29	6.81	3.91
MmugDNA.5751.1.S1_at	MmugDNA.5751.1	gDNA.Hs.152000.0.A1		MmugDNA.5751.1	4.31	2.62	6.17	3.5	13.88	11.87	9.86	2.82	1.59	57.95	26.76	52.06	4.31	2.62	6.17	3.5	-10.78	-6.21	6.8	3.9
MmugDNA.5835.1.S1_at	LOC700615: hypothetical protein LOC700615	gDNA.g12005903	700615	MmugDNA.5835.1	20.34	8.73	32.84	15.45	186.67	184.85	138.77	9.6	5.22	147.28	123.6	73.86	20.34	8.73	32.84	15.45	-6.3	-2.57	7.95	3.895
Mmu.14787.1.S1_at	LOC717632: similar to coatomer protein complex, subunit beta 2 (beta prime)	CO579434	717632	Mmu.14787.1	23.6	31.17	26.29	35.77	115.32	113.87	251.57	5.61	1.97	286.33	179.84	331.42	23.6	31.17	26.29	35.77	-9.17	-5.8	7.39	3.885
MmugDNA.32489.1.S1_at	LOC718733: similar to ubiquitin-conjugating enzyme E2Q	gDNA.g8923743	718733	MmugDNA.32489.1	434.35	453.51	345.84	524.57	5596.63	2340.19	5777.52	10.41	6.1	1106.47	927.23	877.47	434.35	453.51	345.84	524.57	-2.19	-1.66	6.3	3.88
Mmu.13956.1.S1_at	ALDH2: mitochondrial aldehyde dehydrogenase 2	CO774643	713451	Mmu.13956.1	9.71	13.11	22.72	26.22	116.21	65.08	57.21	4.45	1.95	100.83	245.78	328.4	9.71	13.11	22.72	26.22	-12.63	-5.8	8.54	3.875
RPTR-Mmu-AF298789-1_at	AF298789-1	RPTR-Mmu-AF298789-1		AF298789-1	1.59	2.35	1	1	13.74	20.28	37.66	18.18	5.58	6.55	6.29	9.76	1.59	2.35	1	1	-5.62	-2.16	11.9	3.87
MmugDNA.20680.1.S1_at	LOC694746: similar to CXXC finger 5	gDNA.g12803342	694746	MmugDNA.20680.1	15.18	14.84	15.29	17.63	123.59	164.1	50.81	6.66	1.4	149.87	154.32	192.87	15.18	14.84	15.29	17.63	-10.5	-6.33	8.58	3.865
MmugDNA.22422.1.S1_at	MmugDNA.22422.1	gDNA.Hs2.84152.2.S1		MmugDNA.22422.1	152.59	81.06	108.58	83.92	733.65	899.73	640.98	7.41	4.98	425.83	582.9	371.42	152.59	81.06	108.58	83.92	-4.47	-2.62	5.94	3.8
MmugDNA.38119.1.S1_s_at	LOC709103: hypothetical protein LOC709103	gDNA.g7705816	709103	MmugDNA.38119.1	460.48	495.94	434.7	489.09	5308.79	2385.73	5009.88	9.03	5.61	1236.28	1214.02	1438.31	460.48	495.94	434.7	489.09	-2.74	-1.9	5.885	3.755
MmugDNA.27678.1.S1_at	MmugDNA.27678.1	gDNA.Hs.241334.0.A1		MmugDNA.27678.1	15.08	31.43	27.36	22.45	201.68	86.44	547.83	11.62	1.8	279.54	333.09	213.98	15.08	31.43	27.36	22.45	-11.2	-5.7	11.41	3.75
MmugDNA.38894.1.S1_at	LOC717100: similar to torsin family 3, member A	gDNA.Hs.26267.1.S1	717100	MmugDNA.38894.1	6.74	10.4	9.05	6.6	42.51	35.01	38.63	4.92	2.82	64.04	47.01	79.14	6.74	10.4	9.05	6.6	-7.78	-4.68	6.35	3.75
MmugDNA.30377.1.S1_at	MmugDNA.30377.1	gDNA.Hs.8841.0.A1		MmugDNA.30377.1	43.76	71.61	60.92	35.31	288.45	156.52	147.41	3.57	1.27	483.65	599.43	391.49	43.76	71.61	60.92	35.31	-9.5	-6.21	6.535	3.74
MmugDNA.8379.1.S1_at	LOC715462: similar to schlafen family member 5	gDNA.Hs2.352216.1.S1	715462	MmugDNA.8379.1	9.18	6.12	10.62	6.99	80	61.81	31.58	6.65	2.74	115.13	44.41	84.54	9.18	6.12	10.62	6.99	-9.51	-4.73	8.08	3.735
MmugDNA.19722.1.S1_at	LOC696883: hypothetical protein LOC696883	gDNA.Hs.29899.0.A1	696883	MmugDNA.19722.1	44.77	103.27	84.74	52.87	1045.7	585.32	617.43	11.03	6.09	318.85	308.3	243.79	44.77	103.27	84.74	52.87	-4.26	-1.35	7.645	3.72
MmugDNA.1665.1.S1_at	ABCC9: ATP-binding cassette, sub-family C (CFTR/MRP), member 9	gDNA.g10947121	654489	MmugDNA.1665.1	3.24	8.96	4.58	4.34	30.14	97.27	52.49	11.44	3.24	58.64	48.88	43.59	3.24	8.96	4.58	4.34	-9.51	-4.13	10.475	3.685
MmugDNA.7815.1.S1_at	LOC710553: similar to UDP-galactose-4-epimerase	gDNA.g9945333	710553	MmugDNA.7815.1	36.72	32.12	28	23.05	211.64	112.05	180	5.78	3.19	170.89	194.77	230.27	36.72	32.12	28	23.05	-6.62	-4.1	6.2	3.645
MmugDNA.31558.1.S1_at	LOC697691: similar to tsukushi	gDNA.g7661667	697691	MmugDNA.31558.1	14.14	31.46	32.17	27.76	156.88	32.15	233.92	5.55	1.31	324.72	250.96	221.76	14.14	31.46	32.17	27.76	-10.47	-5.93	8.01	3.62
MmugDNA.2000.1.S1_at	LOC702532: similar to colony stimulating factor 1 isoform b precursor	gDNA.g758780	702532	MmugDNA.2000.1	3.42	3.96	1.04	2.43	128.89	27.38	49.56	27.81	5.79	20.79	22.38	40.67	3.42	3.96	1.04	2.43	-10.81	-1.42	19.31	3.605
MmugDNA.33573.1.S1_s_at	STK16: serine/threonine kinase 16	gDNA.g10640970	702715	MmugDNA.33573.1	37.73	28.61	32.52	31.58	501.27	158.66	447.24	11.48	5.54	105.09	85.51	90.04	37.73	28.61	32.52	31.58	-2.88	-1.66	7.18	3.6
MmugDNA.15881.1.S1_at	LOC699383: similar to RAB2, member RAS oncogene family	gDNA.Hs.78305.0.A3	699383	MmugDNA.15881.1	296.73	517.35	485.74	251.53	2622.26	1184.1	2397.46	5.37	3.13	2407.48	2559.25	2030.9	296.73	517.35	485.74	251.53	-6.06	-4.06	5.715	3.595
MmugDNA.3903.1.S1_at	MmugDNA.3903.1	gDNA.Hs.306503.0.S1		MmugDNA.3903.1	19.33	36.23	26.96	36.43	238.09	344.19	224.95	9.01	5.78	70.5	112.23	48.68	19.33	36.23	26.96	36.43	-2.58	-1.36	5.795	3.57
MmugDNA.18405.1.S1_s_at	MmugDNA.18405.1	gDNA.Hs.99206.0.A1		MmugDNA.18405.1	2.31	1.48	2.27	1.84	26.66	5.39	36.59	11.66	1.93	41.08	38.82	26.19	2.31	1.48	2.27	1.84	-18.02	-5.21	14.84	3.57
MmugDNA.41615.1.S1_at	PVR: poliovirus receptor	gDNA.Hs.321018.0.S1	712851	MmugDNA.41615.1	9.74	13.27	15.61	13.97	96.38	71.56	47.28	5.28	3.05	77.69	70.37	88.89	9.74	13.27	15.61	13.97	-6	-4.08	5.64	3.565
MmuSTS.4428.1.S1_at	6-16: putative 6-16 protein	51853785	716339	MmuSTS.4428.1	9.14	5.35	10.43	6.5	147.35	47.71	29.7	10.23	1.72	155.01	143.01	67.27	9.14	5.35	10.43	6.5	-15.66	-5.4	12.945	3.56
MmugDNA.42184.1.S1_at	LOC703086: similar to sarcolemma associated protein	gDNA.Hs.4007.0.S2	703086	MmugDNA.42184.1	9.18	10.12	7.02	7.05	52.55	34.21	31.52	4.7	2.62	75.68	53.93	61.98	9.18	10.12	7.02	7.05	-7.73	-4.48	6.215	3.55
MmugDNA.23225.1.S1_at	MmugDNA.23225.1	gDNA.Hs.208558.0.A1		MmugDNA.23225.1	5.07	4.09	7.26	9.58	33.79	86.48	27.69	7.7	2.49	45.37	41.12	45.49	5.07	4.09	7.26	9.58	-7.02	-4.59	7.36	3.54
MmugDNA.42930.1.S1_at	MmugDNA.42930.1	gDNA.g7019412		MmugDNA.42930.1	292.8	336.73	330.55	343.6	1254	828.7	1177	3.35	2.25	2211.24	2013.22	1843.73	292.8	336.73	330.55	343.6	-6.25	-4.76	4.8	3.505
MmuSTS.3113.1.S1_at	LOC714439: similar to mab-21-like 1	60301304	714439	MmuSTS.3113.1	22.3	8.74	17.23	23.25	305.11	63.93	342.62	13.59	4.59	76.66	143.21	78.65	22.3	8.74	17.23	23.25	-5.8	-2.38	9.695	3.485
MmugDNA.38696.1.S1_at	LOC708086: hypothetical protein LOC708086	gDNA.Hs.113314.0.A1	708086	MmugDNA.38696.1	5.29	5.42	7.95	6.44	205.89	71.34	74.86	19.17	5.45	30.22	39.25	26.47	5.29	5.42	7.95	6.44	-5.28	-1.51	12.225	3.48
MmugDNA.2377.1.S1_at	LOC705476: similar to hydroxyacyl dehydrogenase, subunit A	gDNA.Hs.75860.0.A1	705476	MmugDNA.2377.1	1	4.31	1	1	18.74	91.63	34.1	29.52	5.1	11.87	10.45	6.81	1	4.31	1	1	-6.29	-1.83	17.905	3.465
MmugDNA.43042.1.S1_at	LOC722345: similar to MAD4	gDNA.Hs.102402.2.S3	722345	MmugDNA.43042.1	20.24	53.25	37.86	28.58	141.17	326.36	409.92	8.34	3.8	299.78	264.22	148.6	20.24	53.25	37.86	28.58	-6.46	-3.12	7.4	3.46
MmugDNA.21015.1.S1_at	LOC697233: similar to CG9007-PA	gDNA.Hs.42745.0.A1	697233	MmugDNA.21015.1	1.11	1.43	2.55	3.09	20.44	24.14	17.39	10.63	5.23	8.22	4.96	14.85	1.11	1.43	2.55	3.09	-5.13	-1.68	7.88	3.455
MmugDNA.24174.1.S1_at	LOC699361: similar to laforin isoform a	gDNA.g11321612	699361	MmugDNA.24174.1	7.83	4.53	7.3	4.87	23.3	25.34	11.94	3.25	1.29	63.77	42.62	60.53	7.83	4.53	7.3	4.87	-9.3	-5.61	6.275	3.45
MmugDNA.15583.1.S1_at	LOC711518: similar to Kazal-type serine protease inhibitor domain 1	gDNA.Hs.155234.0.A1	711518	MmugDNA.15583.1	33.28	34.04	51.91	32.62	532.91	216.27	581.8	11.65	5.57	108.81	182.4	178.62	33.28	34.04	51.91	32.62	-3.96	-1.29	7.805	3.43
MmuSTS.4678.1.S1_at	LOC710035: similar to three prime repair exonuclease 1 isoform d	47777219	710035	MmuSTS.4678.1	15.91	22.56	23.04	24.24	80.01	107.53	38.5	3.55	1.29	210.55	120.57	299.27	15.91	22.56	23.04	24.24	-9.94	-5.55	6.745	3.42
MmugDNA.24630.1.S1_s_at	LOC696059: hypothetical protein LOC696059	gDNA.g7108343	696059	MmugDNA.24630.1	5.67	2.79	3.56	2.82	40.41	113.25	42.53	18.38	4.96	17.64	12.98	11.98	5.67	2.79	3.56	2.82	-3.98	-1.87	11.18	3.415
MmugDNA.24481.1.S1_at	MmugDNA.24481.1	gDNA.Hs.50850.0.A1		MmugDNA.24481.1	1	1.44	1	2.02	10.75	15.8	14.45	10.99	4.6	6.2	5.34	10.34	1	1.44	1	2.02	-6.09	-2.22	8.54	3.41
MmuSTS.2383.1.S1_at	LOC716239 /// LOC717296: similar to Pre-B-cell leukemia transcription factor 2 (Homeobox protein PBX2) (Protein G17) /// similar to advanced glycosylation end product-specific receptor isoform 1 precursor	52627009	716239 /// 717296	MmuSTS.2383.1	22.55	17.22	23.31	18.83	190.81	133.96	194.62	8.39	5.26	44.89	59.17	52.69	22.55	17.22	23.31	18.83	-2.54	-1.53	5.465	3.395
MmugDNA.3735.1.S1_at	LOC713848: similar to zinc finger protein 161	gDNA.g6005967	713848	MmugDNA.3735.1	23.74	49.7	58.99	48.32	1035.96	67.82	1157.47	17.13	4.1	315.68	178.41	196.14	23.74	49.7	58.99	48.32	-5.12	-2.69	11.125	3.395
MmugDNA.32724.1.S1_at	LOC708722: similar to rhotekin isoform a	gDNA.Hs.58215.0.S2	708722	MmugDNA.32724.1	13.38	5.51	11.45	14.86	68.89	135.66	58.18	7.92	3.46	69.88	47.46	89.02	13.38	5.51	11.45	14.86	-6.14	-3.32	7.03	3.39
MmugDNA.8719.1.S1_at	LOC718490: similar to c-myc promoter binding protein	gDNA.g7662151	718490	MmugDNA.8719.1	34.33	30.67	42.78	26.04	107.75	80.45	144.41	3.3	1.84	312.86	249.22	205.62	34.33	30.67	42.78	26.04	-7.57	-4.94	5.435	3.39
MmugDNA.17236.1.S1_at	LOC697097: similar to muscleblind-like 2 isoform 1	gDNA.Hs.184340.0.S1	697097	MmugDNA.17236.1	25.67	31.39	30.16	41.23	250.63	182.82	333.94	7.96	3.75	191.09	169.46	176.76	25.67	31.39	30.16	41.23	-5.68	-3.02	6.82	3.385
MmugDNA.14437.1.S1_at	PTD004: GTP-binding protein PTD004	gDNA.g9558756	697309	MmugDNA.14437.1	540.89	451.96	210.53	479.36	4085.83	1301.85	3408.15	6.97	3.51	1932.79	1646.26	1936.04	540.89	451.96	210.53	479.36	-4.37	-3.21	5.67	3.36
MmuSTS.2847.1.S1_at	LOC708170: hypothetical protein LOC708170	47776394	708170	MmuSTS.2847.1	130.63	164.56	116.71	148.66	1956.15	630.5	1865.07	10.7	5.44	267.56	240.42	270.78	130.63	164.56	116.71	148.66	-1.87	-1.27	6.285	3.355
MmuSTS.3457.1.S1_at	LOC712589: similar to ATPase, Class VI, type 11A isoform b	51853623	712589	MmuSTS.3457.1	5.05	6.8	7.36	4.59	62.94	46.74	54.32	9.22	5.07	21.81	23.65	33.06	5.05	6.8	7.36	4.59	-4.37	-1.6	6.795	3.335
MmuSTS.3564.1.S1_x_at	LOC699721: similar to claudin 9	60543164	699721	MmuSTS.3564.1	5.78	7.9	5.78	12.7	112.96	185.88	35.33	14.58	4.06	34.99	56.92	37.46	5.78	7.9	5.78	12.7	-5.41	-2.61	9.995	3.335
MmuSTS.4606.1.S1_at	TNFRSF10A: tumor necrosis factor receptor superfamily, member 10a	49533580	716826	MmuSTS.4606.1	20.34	15.19	16.98	20.83	55.11	89.28	90.36	4.26	2.35	259.68	92.9	144.56	20.34	15.19	16.98	20.83	-9.04	-4.3	6.65	3.325
MmugDNA.22671.1.S1_s_at	LOC706751: similar to Eukaryotic translation initiation factor 4E (eIF4E) (eIF-4E) (mRNA cap-binding protein) (eIF-4F 25 kDa subunit)	gDNA.Hs.79306.0.A1	706751	MmugDNA.22671.1	188.26	129.71	146.04	186.93	1271.69	775.98	1540.12	7.53	4.76	671.09	547.22	630.95	188.26	129.71	146.04	186.93	-3.82	-1.86	5.675	3.31
MmugDNA.15600.1.S1_at	LOC713848: similar to zinc finger protein 161	gDNA.Hs.6557.0.S2	713848	MmugDNA.15600.1	299.27	481.28	500.81	461.73	3713.57	2146.33	3630.49	7.48	4.91	1412.47	1107.44	958.29	299.27	481.28	500.81	461.73	-2.67	-1.71	5.075	3.31
Mmu.6007.1.S1_at	LOC702041: similar to growth factor receptor-bound protein 2 isoform 2	CO646948	702041	Mmu.6007.1	13.5	8.33	12.52	14.04	100.68	195.19	108.79	11.48	4.58	64.37	125.83	61.28	13.5	8.33	12.52	14.04	-6.66	-2.02	9.07	3.3
MmugDNA.9862.1.S1_at	MmugDNA.9862.1	gDNA.Hs2.28329.1.S2		MmugDNA.9862.1	13.99	16.73	19.71	16.67	100.5	126.57	77.99	5.94	3	145.23	96.09	99.13	13.99	16.73	19.71	16.67	-6.48	-3.58	6.21	3.29
MmugDNA.28905.1.S1_at	LOC706183: similar to testis/prostate/placenta-expressed protein, isoform 2 isoform 1	gDNA.Hs.132976.0.A1	706183	MmugDNA.28905.1	1	2.09	8.72	1.65	39.23	91.54	33.93	17.98	4.27	19.52	21.67	15.37	1	2.09	8.72	1.65	-6.28	-2.31	12.13	3.29
MmugDNA.12041.1.S1_at	LOC712024: hypothetical protein LOC712024	gDNA.Hs2.377970.1.A1	712024	MmugDNA.12041.1	10.78	10.42	12.51	24.22	130.26	47.56	112.83	7.16	3.4	87.8	73.66	63.17	10.78	10.42	12.51	24.22	-5.5	-3.12	6.33	3.26
MmugDNA.19730.1.S1_at	LOC699969: similar to thyroid hormone receptor, beta	gDNA.Hs.203213.1.A1	699969	MmugDNA.19730.1	6.67	8.69	10.08	10.05	128.53	27.76	122.09	10.53	3.36	95.53	51.7	74.83	6.67	8.69	10.08	10.05	-8.21	-3.15	9.37	3.255
MmuSTS.4742.1.S1_at	F2RL2: coagulation factor II (thrombin) receptor-like 2	47776607	707260	MmuSTS.4742.1	5.26	3.85	2.41	3.58	24.07	27.81	25.94	7.15	3.75	26.4	21.9	45.06	5.26	3.85	2.41	3.58	-8.12	-2.74	7.635	3.245
MmugDNA.29280.1.S1_at	LOC722507: similar to neuronal calcium sensor-1	gDNA.Hs.301760.1.S1	722507	MmugDNA.29280.1	3.85	3.82	3.96	3.85	43.23	88.78	55.37	15.05	3.41	32.16	37.49	72.31	3.85	3.82	3.96	3.85	-11.44	-3.06	13.245	3.235
MmugDNA.16248.1.S1_s_at	LOC696972: similar to coiled-coil domain containing 107	gDNA.Hs.245342.0.A1	696972	MmugDNA.16248.1	61.27	43.6	32.58	63.68	206.15	263.42	213.96	4.57	2.96	286.92	432.95	245.51	61.27	43.6	32.58	63.68	-6.36	-3.5	5.465	3.23
MmuSTS.4531.1.S1_at	ASB1: ankyrin repeat and SOCS box-containing protein 1	56089196	696716	MmuSTS.4531.1	34.38	32.7	32.02	40.71	192.42	92.76	178.77	4.27	2.66	227.04	185.73	151.02	34.38	32.7	32.02	40.71	-5.18	-3.8	4.725	3.23
MmugDNA.36303.1.S1_at	MmugDNA.36303.1	gDNA.g13325061		MmugDNA.36303.1	19.11	25.36	24.37	24.14	376.08	118.24	351.11	12.06	4.87	82.17	74.34	64.19	19.11	25.36	24.37	24.14	-3.1	-1.55	7.58	3.21
MmuSTS.4711.1.S1_at	YWHAH: similar to 14-3-3 protein eta (Protein AS1)	47777246	717016	MmuSTS.4711.1	90.28	170.34	199.48	136.23	1025.17	315.22	998.87	5.32	2.4	910.6	779.11	1002.86	90.28	170.34	199.48	136.23	-6.24	-4.01	5.78	3.205
MmugDNA.16359.1.S1_at	DLC1: deleted in liver cancer 1	gDNA.g2559001	700630	MmugDNA.16359.1	17.77	11.56	39.81	11.64	275.07	68.31	203.85	9.12	3.55	116.85	80.36	120.59	17.77	11.56	39.81	11.64	-5.21	-2.84	7.165	3.195
MmugDNA.23632.1.S1_at	MmugDNA.23632.1	gDNA.Hs2.385667.1.S1		MmugDNA.23632.1	3.73	8.63	1.88	6.41	93.05	12.38	96.67	12.51	3.52	42	17.41	63.07	3.73	8.63	1.88	6.41	-7.57	-2.87	10.04	3.195
MmugDNA.24062.1.S1_at	LOC714983: similar to phosphodiesterase 10A	gDNA.Hs.128291.0.S2	714983	MmugDNA.24062.1	1	2.88	1.97	3.66	75.41	19.75	20.34	16.53	2.99	25.02	14.39	26.35	1	2.88	1.97	3.66	-9.21	-3.39	12.87	3.19
MmugDNA.21146.1.S1_at	LOC717056: similar to integral membrane protein 1	gDNA.g4504786	717056	MmugDNA.21146.1	87.78	166.82	155.21	161.9	711.37	301.17	635.08	3.87	2.06	919.84	876.76	971.98	87.78	166.82	155.21	161.9	-6.64	-4.3	5.255	3.18
MmugDNA.19375.1.S1_at	MmugDNA.19375.1	gDNA.Hs2.352271.1.S1		MmugDNA.19375.1	1.15	2.77	5.75	2.88	40.45	78.92	27.64	17.58	5	8.05	11.31	14.5	1.15	2.77	5.75	2.88	-3.93	-1.32	10.755	3.16
MmugDNA.2257.1.S1_at	MmugDNA.2257.1	gDNA.Hs.13766.0.S1		MmugDNA.2257.1	16.29	19.22	21.19	18	35.4	84.55	69.89	3.2	1.34	108.61	127.3	137.46	16.29	19.22	21.19	18	-6.63	-4.96	4.915	3.15
MmugDNA.25099.1.S1_at	MmugDNA.25099.1	gDNA.Hs.44811.0.A1		MmugDNA.25099.1	11.66	13.04	14.15	8.65	90.31	125.68	59.47	7.71	4.07	42.08	48.78	58.26	11.66	13.04	14.15	8.65	-4.19	-2.21	5.95	3.14
MmugDNA.27680.1.S1_at	MmugDNA.27680.1	gDNA.Hs.241334.0.A2		MmugDNA.27680.1	49.03	31.76	28.52	24.44	168.01	127.09	170.1	4.84	3.11	164.51	162.24	147.5	49.03	31.76	28.52	24.44	-4.85	-3.15	4.845	3.13
MmuSTS.2488.1.S1_at	ZNF462: zinc finger protein 462	52627060	711489	MmuSTS.2488.1	33.23	32.37	43.22	33.63	834.13	97.9	643.26	14.89	4.49	83.26	93.37	119.48	33.23	32.37	43.22	33.63	-2.78	-1.76	8.835	3.125
MmugDNA.36047.1.S1_at	LOC717766: similar to proteasome beta 8 subunit isoform E2 proprotein	gDNA.g596139	717766	MmugDNA.36047.1	25.36	25.85	17.66	20.39	123.69	212.83	136.47	7.09	3.95	73.92	104.9	92.23	25.36	25.85	17.66	20.39	-4.05	-2.27	5.57	3.11
MmuSTS.3029.1.S1_at	PRCP: prolylcarboxypeptidase	47777000	701305	MmuSTS.3029.1	45.98	4.49	5.09	6.83	108.85	62.22	37.46	5.47	1.56	470.47	228.4	488.92	45.98	4.49	5.09	6.83	-29.06	-4.66	17.265	3.11
MmugDNA.10947.1.S1_at	NTNG1: netrin G1	gDNA.g7662425	694410	MmugDNA.10947.1	2.78	9.41	7.89	15.54	64.43	75.86	88.35	8.94	4.87	25.13	28.42	31.87	2.78	9.41	7.89	15.54	-3.26	-1.34	6.1	3.105
MmugDNA.16994.1.S1_at	LOC720768: similar to beta1,4-N-acetylgalactosaminyltransferases IV	gDNA.Hs.143272.0.A1	720768	MmugDNA.16994.1	14.14	9.45	23.21	16.5	116.14	74.4	80.89	6.03	3.36	64.65	81.05	100.47	14.14	9.45	23.21	16.5	-5.26	-2.82	5.645	3.09
Mmu.7280.1.S1_at	PRPS2: phosphoribosyl pyrophosphate synthetase 2	CN801913	720853	Mmu.7280.1	3.77	12.48	14.36	10.21	127.75	35.65	43.4	6.41	1.49	89.79	70.06	111.03	3.77	12.48	14.36	10.21	-8.44	-4.67	7.425	3.08
MmugDNA.17430.1.S1_at	LOC712161: similar to Transcription factor E3	gDNA.Hs.274184.1.S1	712161	MmugDNA.17430.1	122.12	257.37	366.85	178.55	1655.31	896.9	2038.54	6.75	3.79	893.97	930.28	781.72	122.12	257.37	366.85	178.55	-3.81	-2.36	5.28	3.075
MmugDNA.38915.1.S1_s_at	KBTBD2: kelch repeat and BTB (POZ) domain containing 2	gDNA.g4929614	709126	MmugDNA.38915.1	22.37	38.1	41.1	44.26	644.92	295.06	238.3	10.9	4.62	151.25	68.57	132.73	22.37	38.1	41.1	44.26	-3.18	-1.51	7.04	3.065
MmugDNA.42960.1.S1_at	BDNF: brain-derived neurotrophic factor	gDNA.Hs.146442.0.A1	701245	MmugDNA.42960.1	39.93	29.11	25.99	44.94	768.62	141.82	339.57	11.75	3.12	229.51	252.94	193.15	39.93	29.11	25.99	44.94	-6.3	-3.01	9.025	3.065
MmugDNA.16392.1.S1_at	MmugDNA.16392.1	gDNA.Hs2.7138.2.S1		MmugDNA.16392.1	2.08	1.18	1.89	2.09	7.63	50.76	46.51	19.8	4.87	8.57	5.59	5.26	2.08	1.18	1.89	2.09	-3.76	-1.25	11.78	3.06
MmugDNA.35354.1.S1_at	LOC707312: similar to round spermatid basic protein 1	gDNA.Hs.3623.0.S4	707312	MmugDNA.35354.1	68.78	63.7	47.76	48.24	1321.16	209.98	865.21	14.14	4.79	129.17	110.09	93.34	68.78	63.7	47.76	48.24	-1.94	-1.32	8.04	3.055
MmugDNA.39132.1.S1_at	LOC699283: similar to RAS-related protein RAB-22A	gDNA.Hs.19180.0.A1	699283	MmugDNA.39132.1	109.98	138.72	100.8	109.54	754.2	551.23	598.17	5.59	3.88	677.11	462.58	370.08	109.98	138.72	100.8	109.54	-4.27	-2.21	4.93	3.045
MmugDNA.5933.1.S1_at	LOC698576: similar to plakophilin 4 isoform a	gDNA.Hs.152151.0.S3	698576	MmugDNA.5933.1	18.84	37.59	72.95	39.87	368.28	35.57	504.93	7.45	1.68	263.99	293.98	395.49	18.84	37.59	72.95	39.87	-7.76	-4.4	7.605	3.04
MmugDNA.39185.1.S1_at	MmugDNA.39185.1	gDNA.g13436196		MmugDNA.39185.1	30.6	18.65	22	21.51	163.06	315.41	146.51	9.11	3.97	112.02	157.21	142.65	30.6	18.65	22	21.51	-5.94	-2.1	7.525	3.035
MmugDNA.31923.1.S1_at	G6PC: glucose-6-phosphatase, catalytic	gDNA.Hs.242.1.S1	702269	MmugDNA.31923.1	27.01	23.67	21.19	21.48	223.43	434.84	106.14	10.75	3.38	116.83	97.77	133.69	27.01	23.67	21.19	21.48	-4.81	-2.68	7.78	3.03
MmugDNA.35561.1.S1_at	MmugDNA.35561.1	gDNA.Hs.75813.1.S1		MmugDNA.35561.1	1.79	1.9	1	1.74	63.94	16.36	34.99	23.87	4.8	6.43	10.07	10.4	1.79	1.9	1	1.74	-5.4	-1.23	14.635	3.015
MmuSTS.4027.1.S1_at	LOC698127: cytochrome P450, family 7, subfamily A, polypeptide 1	47776537	698127	MmuSTS.4027.1	2.39	3.53	1.5	1.92	25.29	13.49	7.63	6.75	2.4	40.18	11.39	19.23	2.39	3.53	1.5	1.92	-10.39	-3.62	8.57	3.01
MmugDNA.30706.1.S1_at	MmugDNA.30706.1	gDNA.Hs.57548.0.A1		MmugDNA.30706.1	60.81	62.11	46.27	60.42	298.04	104.64	278.09	3.83	1.64	262.19	528.01	515.21	60.81	62.11	46.27	60.42	-7.49	-4.37	5.66	3.005
MmugDNA.3396.1.S1_at	LOC708207: similar to CG8312-PA, isoform A	gDNA.Hs2.39168.1.S1	708207	MmugDNA.3396.1	2.67	1.62	1.76	1	35.51	32.31	16.88	17.45	4.57	7.55	16.15	12.69	2.67	1.62	1.76	1	-7.89	-1.43	12.67	3
MmugDNA.38357.1.S1_at	LOC702146: similar to neuron navigator 2 isoform 1	gDNA.g9506612	702146	MmugDNA.38357.1	16.18	72.68	89.16	34.53	278.83	253.56	560	7.14	3.17	242.2	263.16	376.36	16.18	72.68	89.16	34.53	-5.65	-2.83	6.395	3
MmugDNA.8887.1.S1_at	LOC719116: hypothetical protein LOC719116	gDNA.Hs2.19554.4.S1	719116	MmugDNA.8887.1	2.33	3.02	2.63	3.21	42.07	41.44	9.31	10.87	3.87	9.43	11.88	22.5	2.33	3.02	2.63	3.21	-5.13	-2.09	8	2.98
MmugDNA.36138.1.S1_at	LOC702504: similar to calcium/calmodulin-dependent protein kinase II, delta isoform 1	gDNA.Hs.111460.3.S2	702504	MmugDNA.36138.1	8.37	7.72	6.67	3.35	131.09	67.37	34	11.96	3.87	74.5	63.02	49.69	8.37	7.72	6.67	3.35	-9.46	-2.09	10.71	2.98
MmuSTS.6.1.S1_at	LOC709666: similar to glutathione S-transferase A4	47776687	709666	MmuSTS.6.1	21.77	25.33	21.41	35.78	64.93	98.05	173.23	4.39	2.08	124.41	195.5	131.07	21.77	25.33	21.41	35.78	-5.94	-3.87	5.165	2.975
MmugDNA.27013.1.S1_at	MmugDNA.27013.1	gDNA.Hs.62654.0.A1		MmugDNA.27013.1	6.03	9.89	9.38	4	55.07	106.31	67.81	10.78	4.61	44.55	39.51	8.58	6.03	9.89	9.38	4	-4.33	-1.34	7.555	2.975
MmugDNA.34704.1.S1_at	LOC694094: similar to pecanex homolog	gDNA.Hs.55947.0.S1	694094	MmugDNA.34704.1	64.41	35.64	52.31	38.55	319.76	458.08	332.01	7.53	4.75	135.99	155.98	145.59	64.41	35.64	52.31	38.55	-3.05	-1.2	5.29	2.975
NC-004148.CDS6.S1_at	NC-004148.CDS6			NC-004148.CDS6	3.43	5.56	6.77	3.96	31.73	18.04	16.29	4.3	1.39	38.19	62.62	33.49	3.43	5.56	6.77	3.96	-9.05	-4.52	6.675	2.955
MmugDNA.18150.1.S1_at	LOC716504: similar to Cdc42 effector protein 2	gDNA.Hs.12289.1.A1	716504	MmugDNA.18150.1	9.59	10.33	10.21	7.71	82	63.56	45.62	6.53	3.42	70.98	41.79	34.53	9.59	10.33	10.21	7.71	-5.07	-2.47	5.8	2.945
MmugDNA.32925.1.S1_s_at	LOC708871: similar to esterase D/formylglutathione hydrolase	gDNA.g12654662	708871	MmugDNA.32925.1	226.62	213.04	172.93	281.24	1599.32	524.99	1646.16	5.71	2.77	1005.22	1102.97	1256.73	226.62	213.04	172.93	281.24	-5.08	-3.11	5.395	2.94
MmugDNA.33533.1.S1_at	LOC710452: similar to HLA class I histocompatibility antigen, Cw-4 alpha chain precursor (MHC class I antigen Cw*4)	gDNA.g184213	710452	MmugDNA.33533.1	24.47	22.28	23.93	25.54	139.69	163.46	128	5.8	3.21	137.96	139.06	90.49	24.47	22.28	23.93	25.54	-5.03	-2.67	5.415	2.94
Mmu.14166.1.S1_at	LOC699804: similar to calcium binding protein Cab45 precursor	BQ807685	699804	Mmu.14166.1	81.6	74.68	57.42	94.64	252.28	237.66	204.05	2.95	2.05	356.2	534.21	387.13	81.6	74.68	57.42	94.64	-5.51	-3.82	4.23	2.935
MmugDNA.4513.1.S1_at	LOC700686: similar to twinfilin isoform 1	gDNA.Hs.82643.1.S1	700686	MmugDNA.4513.1	43.38	28.1	31.57	45.17	682.61	69.19	571.66	12.09	2.88	369.85	208.98	322.39	43.38	28.1	31.57	45.17	-8.02	-2.91	10.055	2.895
MmugDNA.18237.1.S1_at	MmugDNA.18237.1	gDNA.Hs2.270379.1.S1		MmugDNA.18237.1	9.97	17.19	11.77	13.53	257.52	59.4	139.17	11.26	3.26	101.61	100.47	92.09	9.97	17.19	11.77	13.53	-7.54	-2.48	9.4	2.87
MmugDNA.39842.1.S1_at	LOC698314: hypothetical protein LOC698314	gDNA.Hs.326292.0.A2	698314	MmugDNA.39842.1	268.29	245.24	447.72	202.19	726.71	863.98	727.02	2.62	1.82	1504.55	1884.05	1395.06	268.29	245.24	447.72	202.19	-5.48	-3.88	4.05	2.85
MmuSTS.632.1.S1_at	LOC696339: similar to insulin-like growth factor binding protein 5	47776745	696339	MmuSTS.632.1	151.11	235.29	243.21	182.91	1428.66	846.12	920.08	5.29	3.24	962	2045.41	720.71	151.11	235.29	243.21	182.91	-6.18	-2.46	5.735	2.85
MmuAffx.52.1.A1_at	MmuAffx.52.1	AF457196.1		MmuAffx.52.1	33.85	39.74	41.93	31.75	141.08	103.9	127.87	3.32	2.31	153.65	252.98	175.83	33.85	39.74	41.93	31.75	-5.18	-3.39	4.25	2.85
MmugDNA.43207.1.S1_at	LOC719089: similar to synapse defective 1, Rho GTPase, homolog 1	gDNA.Hs.9291.0.S1	719089	MmugDNA.43207.1	165.17	125.68	171.69	161.12	1757.5	495.68	1426.22	7.86	3.65	536.91	564.19	455.32	165.17	125.68	171.69	161.12	-3.37	-2.04	5.615	2.845
MmugDNA.38095.1.S1_at	LOC702135: similar to solute carrier family 38, member 1	gDNA.Hs.193063.0.S1	702135	MmugDNA.38095.1	187.54	198.12	200.28	188.64	589.27	435.46	831.32	3.07	1.63	1260.67	1427.03	921.56	187.54	198.12	200.28	188.64	-6.16	-4.04	4.615	2.835
MmuSTS.3213.1.S1_at	ATXN1: similar to Ataxin-1 (Spinocerebellar ataxia type 1 protein)	47777075	702975	MmuSTS.3213.1	13.8	27.52	20.17	9.61	781.03	17.95	440.92	24.67	2.92	152.87	99.99	68.33	13.8	27.52	20.17	9.61	-6.12	-2.73	15.395	2.825
MmugDNA.31198.1.S1_at	LOC708613: similar to gluconokinase-like protein	gDNA.Hs.103158.0.A1	708613	MmugDNA.31198.1	5.85	12.17	11.42	9.7	61.06	77.07	56	6.63	4.08	24.55	31.7	44.62	5.85	12.17	11.42	9.7	-3.25	-1.56	4.94	2.82
MmugDNA.534.1.S1_at	MmugDNA.534.1	gDNA.Hs.220918.0.S1		MmugDNA.534.1	4.56	6.67	2.47	6.35	61.57	149.82	18.11	14.43	1.39	74.68	46.89	45.45	4.56	6.67	2.47	6.35	-10.2	-4.23	12.315	2.81
RPTR-Mmu-AF292560-1_s_at	AF292560-1	RPTR-Mmu-AF292560-1		AF292560-1	1	1.27	1.07	1.56	15.63	13.94	18.06	13.13	3.97	10.3	3.94	14.81	1	1.27	1.07	1.56	-7.92	-1.65	10.525	2.81
MmugDNA.19109.1.S1_at	IL15: interleukin 15	gDNA.g10835152	699616	MmugDNA.19109.1	1	8.09	8.52	7.3	150.24	49.05	42.72	13.83	3.71	21.09	23.21	38.47	1	8.09	8.52	7.3	-4.57	-1.88	9.2	2.795
MmuSTS.2522.1.S1_at	MmuSTS.2522.1	49533278		MmuSTS.2522.1	11.61	12.58	14.87	10.85	49.64	58.39	25.38	3.41	1.3	107.48	59.35	118.34	11.61	12.58	14.87	10.85	-7.43	-4.28	5.42	2.79
MmugDNA.14485.1.S1_at	MmugDNA.14485.1	gDNA.Hs.209382.0.A1		MmugDNA.14485.1	16.54	7.14	6.82	7.85	49.1	170.96	73.09	9.81	2.42	85.92	63.81	109.28	16.54	7.14	6.82	7.85	-8.42	-3.15	9.115	2.785
MmugDNA.25229.1.S1_at	LOC707018: hypothetical protein LOC707018	gDNA.Hs.159528.0.S1	707018	MmugDNA.25229.1	1.29	1.85	3.15	1	22.37	38.27	7.56	13.67	3.73	11.01	11.82	11.67	1.29	1.85	3.15	1	-6.84	-1.83	10.255	2.78
MmugDNA.36618.1.S1_s_at	LOC704637 /// LOC706967: similar to fumarylacetoacetate hydrolase domain containing 2A	gDNA.g7705607	704637 /// 706967	MmugDNA.36618.1	17.23	20.15	18.21	24.77	114.82	136.31	66.68	5.17	2.78	56.69	110.71	128.51	17.23	20.15	18.21	24.77	-4.88	-2.78	5.025	2.78
MmugDNA.24922.1.S1_at	MmugDNA.24922.1	gDNA.Hs.87384.0.A1		MmugDNA.24922.1	8.26	5.5	4.89	4.86	68.72	36.87	147.23	14.21	3.91	22.69	20.82	27.24	8.26	5.5	4.89	4.86	-3.92	-1.65	9.065	2.78
MmugDNA.21256.1.S1_at	LOC698666: similar to Ataxin-7-like protein 1	gDNA.Hs.114012.1.S1	698666	MmugDNA.21256.1	13.1	17.89	13.68	13.49	78.67	111.91	48.69	5.38	2.6	57.56	80.76	64.14	13.1	17.89	13.68	13.49	-4.63	-2.96	5.005	2.78
MmuSTS.2131.1.S1_x_at	MmuSTS.2131.1	60301120		MmuSTS.2131.1	21.66	20.72	18.3	17.74	145.7	442.38	158.23	12.72	4.1	49.09	47.44	54.58	21.66	20.72	18.3	17.74	-2.56	-1.44	7.64	2.77
MmunewRS.374.1.S1_at	MmunewRS.374.1	21361295		MmunewRS.374.1	1.68	3.99	2.4	5.14	23.54	19.75	20.64	6.32	3.94	15.88	15.01	9.98	1.68	3.99	2.4	5.14	-3.88	-1.6	5.1	2.77
MmuSTS.3902.1.S1_at	RASA1: RAS p21 protein activator 1	60301404	694085	MmuSTS.3902.1	117.36	211.1	247.98	191.83	715.7	582.36	948.86	4.04	2.55	981.84	893.24	857.91	117.36	211.1	247.98	191.83	-4.89	-2.99	4.465	2.77
MmugDNA.35716.1.S1_at	LOC699470: similar to vacuolar protein sorting 53	gDNA.g13543951	699470	MmugDNA.35716.1	24.19	23.51	19.38	44.87	116.96	304.4	370.8	9.17	4.3	56.67	71.47	68.86	24.19	23.51	19.38	44.87	-2.26	-1.22	5.715	2.76
MmugDNA.17704.1.S1_at	LOC706316: similar to Enah/Vasp-like	gDNA.g7706686	706316	MmugDNA.17704.1	75.19	98.71	89.92	93.78	504.92	528.79	827.33	6.89	4.23	222.95	349.94	196.38	75.19	98.71	89.92	93.78	-2.79	-1.28	4.84	2.755
MmugDNA.12575.1.S1_at	LOC700495: similar to butyrophilin, subfamily 2, member A1 isoform 1 precursor	gDNA.Hs.169963.2.S1	700495	MmugDNA.12575.1	10.68	14.84	10.8	8.74	28.13	50.62	26.44	3.14	1.45	102.88	50.54	77.47	10.68	14.84	10.8	8.74	-6.82	-4.05	4.98	2.75
MmugDNA.31720.1.S1_at	LOC708927: similar to CUE domain-containing protein 1	gDNA.g8923664	708927	MmugDNA.31720.1	50.71	52.82	69.16	48.98	581.86	152	580.14	7.99	3.5	182.65	215.61	153.15	50.71	52.82	69.16	48.98	-3.26	-1.99	5.625	2.745
MmugDNA.6576.1.S1_at	MmugDNA.6576.1	gDNA.Hs.266933.1.A2		MmugDNA.6576.1	2.41	4.39	4.02	4.07	25.74	22.99	26.26	6.7	3.92	20.97	17.92	7.29	2.41	4.39	4.02	4.07	-3.92	-1.54	5.31	2.73
MmugDNA.1189.1.S1_at	LOC705236: similar to Tropomyosin 1 alpha chain (Alpha-tropomyosin)	gDNA.Hs.270915.0.A1	705236	MmugDNA.1189.1	46.78	38.62	28.17	39.58	227.95	328.33	169.85	6.46	3.73	101.32	189.46	139.33	46.78	38.62	28.17	39.58	-3.73	-1.72	5.095	2.725
MmuSTS.3316.1.S1_at	LOC711996: similar to F-box and WD-40 domain protein 4	62000589	711996	MmuSTS.3316.1	29.48	30.59	29.09	29.8	364.47	145.11	294.86	8.89	4.03	83.55	85.18	101	29.48	30.59	29.09	29.8	-3.02	-1.41	5.955	2.72
MmugDNA.22991.1.S1_at	PSME2: similar to Proteasome activator complex subunit 2 (Proteasome activator 28-beta subunit) (PA28beta) (PA28b) (Activator of multicatalytic protease subunit 2) (11S regulator complex beta subunit) (REG-beta)	gDNA.g4506236	715288	MmugDNA.22991.1	203.31	96.88	104.29	180.44	360.94	675.32	412.99	3.3	1.65	609.58	1244.27	938.54	203.31	96.88	104.29	180.44	-6.46	-3.78	4.88	2.715
MmugDNA.19030.1.S1_at	LOC719152: similar to pyruvate kinase, liver and RBC isoform 1	gDNA.g10835120	719152	MmugDNA.19030.1	1.69	2.49	3.19	4.1	117.97	54.89	58.82	28.34	4.01	17.84	18.74	31.23	1.69	2.49	3.19	4.1	-8.03	-1.42	18.185	2.715
MmugDNA.28382.1.S1_at	LOC721653: similar to F-box and WD-40 domain protein 5	gDNA.g12654080	721653	MmugDNA.28382.1	69.96	66.42	74.34	91.07	554.65	129.46	320.08	4.39	1.57	363.54	408.33	385.32	69.96	66.42	74.34	91.07	-5.16	-3.86	4.775	2.715
MmugDNA.34988.1.S1_at	TXNDC: similar to Thioredoxin domain-containing protein 1 precursor (Transmembrane Trx-related protein) (Thioredoxin-related transmembrane protein)	gDNA.g13559515	707057	MmugDNA.34988.1	15.72	42.2	68.33	55.85	652.33	184.16	798	13.49	4.01	228.61	200.55	243.43	15.72	42.2	68.33	55.85	-5.46	-1.4	9.475	2.705
MmuSTS.1532.1.S1_at	MmuSTS.1532.1	62000232		MmuSTS.1532.1	40.88	39.78	28.45	44.99	260.53	513.75	204.93	8.56	4.08	152.33	95.32	114.08	40.88	39.78	28.45	44.99	-3.08	-1.33	5.82	2.705
MmugDNA.38723.1.S1_at	LOC710953: similar to a disintegrin and metalloprotease domain 28 isoform 1	gDNA.g11496995	710953	MmugDNA.38723.1	4.89	4.92	3.7	1.53	32.45	15.78	26.84	6.95	3.69	10.91	11.78	8.89	4.89	4.92	3.7	1.53	-2.94	-1.69	4.945	2.69
MmugDNA.11859.1.S1_at	LOC696679: similar to 5-nucleotidase domain containing 2	gDNA.g12597652	696679	MmugDNA.11859.1	24.48	49.47	33.1	29.34	396.18	49.44	335.8	7.55	2.11	121.96	317.01	334.94	24.48	49.47	33.1	29.34	-7.41	-3.25	7.48	2.68
MmugDNA.41178.1.S1_at	PIGC: phosphatidylinositol glycan, class C	gDNA.Hs.306173.0.S1	705657	MmugDNA.41178.1	68.07	119.09	133.73	99.03	732.2	369.65	793.34	6.16	3.69	269.71	227.6	265.13	68.07	119.09	133.73	99.03	-2.44	-1.63	4.3	2.66
MmugDNA.42533.1.S1_at	MmugDNA.42533.1	gDNA.Hs.265591.1.A1		MmugDNA.42533.1	3.81	4.67	3.37	11.45	98.35	72.68	28.36	12.57	4.1	17.12	19.71	33.64	3.81	4.67	3.37	11.45	-4.63	-1.22	8.6	2.66
MmugDNA.22851.1.S1_at	LOC711857: similar to membrane-associated ring finger (C3HC4) 2 isoform 1	gDNA.g7106869	711857	MmugDNA.22851.1	33.99	34.56	27.62	54.04	237.86	256.12	216.59	6.51	3.98	85.11	169.05	110.71	33.99	34.56	27.62	54.04	-3.21	-1.33	4.86	2.655
MmugDNA.16422.1.S1_at	PKD1: polycystin 1	gDNA.Hs.75813.2.S1	694905	MmugDNA.16422.1	18.2	8.15	11.1	15.06	145.64	221.71	63.45	11.16	3.93	36.33	58.61	48.74	18.2	8.15	11.1	15.06	-3.64	-1.36	7.4	2.645
MmugDNA.23895.1.S1_at	MmugDNA.23895.1	gDNA.Hs.55069.0.S2		MmugDNA.23895.1	2.21	1	2.05	3.21	23.84	2.85	41.38	12.11	1.87	17.51	12.18	16.91	2.21	1	2.05	3.21	-8.02	-3.41	10.065	2.64
MmugDNA.6931.1.S1_at	TSPAN8: similar to Tetraspanin-8 (Tspan-8) (Transmembrane 4 superfamily member 3) (Tumor-associated antigen CO-029)	gDNA.g4759237	718622	MmugDNA.6931.1	3.96	9.05	6.87	6.45	51.85	32.11	43.69	6.85	3.85	31.39	73.43	17.66	3.96	9.05	6.87	6.45	-6.17	-1.42	6.51	2.635
MmugDNA.18851.1.S1_at	CCND2: similar to G1/S-specific cyclin-D2	gDNA.Hs.75586.0.A1	710379	MmugDNA.18851.1	24.63	25.69	21.89	26.66	148.86	268.14	129.52	7.26	3.41	111.89	86.89	84.01	24.63	25.69	21.89	26.66	-3.72	-1.86	5.49	2.635
MmugDNA.30048.1.S1_at	LOC716921: similar to solute carrier family 41, member 3 isoform 1	gDNA.g8923438	716921	MmugDNA.30048.1	24.82	32.49	30.6	24.11	278.78	86.5	298.97	8.25	3.15	168.18	119.08	137.84	24.82	32.49	30.6	24.11	-5.02	-2.09	6.635	2.62
MmugDNA.18905.1.S1_at	LOC700123: similar to proline rich 7 (synaptic)	gDNA.g13386473	700123	MmugDNA.18905.1	94.28	86.15	96.88	93.14	401.67	493.42	472.94	4.97	3.94	159.65	193.34	150.78	94.28	86.15	96.88	93.14	-1.81	-1.3	3.39	2.62
MmugDNA.37705.1.S1_at	MmugDNA.37705.1	gDNA.Hs.60137.0.A1		MmugDNA.37705.1	13.55	12.75	13.82	10.89	86.37	51.44	88.42	5.99	3.73	32.76	20.98	34.08	13.55	12.75	13.82	10.89	-2.35	-1.5	4.17	2.615
MmugDNA.468.1.S1_at	LOC704526: similar to Homeobox protein Hox-C9 (Hox-3.2)	gDNA.g12056968	704526	MmugDNA.468.1	14.03	10.57	14.12	13.89	75.51	179.14	243.6	12.49	3.67	59.8	67.2	69.52	14.03	10.57	14.12	13.89	-5	-1.55	8.745	2.61
MmuSTS.125.1.S1_at	LOC700221: similar to Homeobox protein Hox-A5 (Hox-1.3) (M2)	51853832	700221	MmuSTS.125.1	24.13	22.23	24.62	42.21	702.42	30.21	388.79	13.24	1.6	160	133.06	151.73	24.13	22.23	24.62	42.21	-5.3	-3.62	9.27	2.61
MmugDNA.8402.1.S1_at	LOC698073: similar to anaphase promoting complex subunit 1	gDNA.Hs.40137.2.A1	698073	MmugDNA.8402.1	7.27	12.77	11.66	6.66	101.6	23.14	38.86	5.77	1.42	76.54	67.36	76.25	7.27	12.77	11.66	6.66	-7.73	-3.79	6.75	2.605
MmugDNA.2094.1.S1_s_at	EIF4A2 /// LOC718869: eukaryotic translation initiation factor 4A, isoform 2 /// similar to eukaryotic translation initiation factor 4A2	gDNA.Hs2.410186.1.A1	707775 /// 718869	MmugDNA.2094.1	59.4	44.73	45.18	54.77	232.93	208.91	418.55	5.77	3.37	176.15	151.71	134.92	59.4	44.73	45.18	54.77	-3.01	-1.84	4.39	2.605
MmunewRS.415.1.S1_at	LOC707385: hypothetical protein LOC707385	42659431	707385	MmunewRS.415.1	14.86	17.72	16.23	16.01	99.91	250.59	96.5	9.1	3.66	96	35	64.28	14.86	17.72	16.23	16.01	-3.77	-1.5	6.435	2.58
MmugDNA.18850.1.S1_at	LOC714692: similar to ubiquitin conjugating enzyme 7 interacting protein 3 isoform 2	gDNA.Hs.247280.3.A1	714692	MmugDNA.18850.1	78.09	97.05	32	69.28	201.09	164.4	218.19	2.92	1.44	431.76	476.47	447.94	78.09	97.05	32	69.28	-6.94	-3.7	4.93	2.57
MmugDNA.41098.1.S1_at	MmugDNA.41098.1	gDNA.Hs2.376466.2.S1		MmugDNA.41098.1	33.96	33.85	31.24	19.71	218.62	194.38	132.28	6.11	3.9	55.78	59.56	60.25	33.96	33.85	31.24	19.71	-1.98	-1.24	4.045	2.57
MmugDNA.18415.1.S1_at	LOC703912: similar to zinc-finger protein NOLZ1	gDNA.Hs.182740.2.S1	703912	MmugDNA.18415.1	217.46	115.91	131.17	167.99	2200.14	82.28	1448.35	7.95	1.35	1361.11	1231.58	594.31	217.46	115.91	131.17	167.99	-6.76	-3.78	7.355	2.565
MmugDNA.12064.1.S1_s_at	CDKN2B: similar to Cyclin-dependent kinase 4 inhibitor B (p14-INK4b) (p15-INK4b) (Multiple tumor suppressor 2) (MTS2)	gDNA.g11386206	709209	MmugDNA.12064.1	9.96	8.81	8.41	12.21	70.54	164.37	64.76	10.51	3.28	33.67	37.62	28.24	9.96	8.81	8.41	12.21	-3.36	-1.84	6.935	2.56
MmuSTS.153.1.S1_at	MEIS2: homeobox protein Meis2	59676315	699748	MmuSTS.153.1	50.19	84.68	90.78	74.41	1074.96	256.49	797.66	9.39	3.7	157.29	158.77	179.53	50.19	84.68	90.78	74.41	-2.22	-1.41	5.805	2.555
MmugDNA.22166.1.S1_s_at	LOC714432: similar to RNA-binding protein EWS	gDNA.Hs.129953.0.A2	714432	MmugDNA.22166.1	35.89	28.75	20.99	32.77	147.91	223.08	103.25	5.32	2.8	114.89	73.36	149.05	35.89	28.75	20.99	32.77	-3.8	-2.28	4.56	2.54
MmugDNA.32165.1.S1_at	MmugDNA.32165.1	gDNA.Hs.118056.0.A1		MmugDNA.32165.1	6.05	5.44	4.68	7.49	19.63	17.87	14.17	2.94	1.33	40.71	25.68	39.02	6.05	5.44	4.68	7.49	-5.96	-3.75	4.45	2.54
MmugDNA.21470.1.S1_at	MmugDNA.21470.1	gDNA.Hs2.434217.1.S1		MmugDNA.21470.1	1.98	1	2.29	3.13	27.57	4.14	37.34	10.85	1.94	10.92	34.17	22.58	1.98	1	2.29	3.13	-10.31	-3.14	10.58	2.54
MmugDNA.38377.1.S1_s_at	FH: fumarate hydratase	gDNA.Hs.283831.0.S1	707542	MmugDNA.38377.1	166.89	258.59	206.31	293.99	1429.73	916.09	1614.69	5.81	3.17	809.1	1056.79	1247.85	166.89	258.59	206.31	293.99	-4.53	-1.91	5.17	2.54
MmugDNA.5736.1.S1_at	LOC695224: similar to Transcriptional activator protein Pur-alpha (Purine-rich single-stranded DNA-binding protein alpha)	gDNA.Hs.29117.0.S2	695224	MmugDNA.5736.1	239.62	280.46	290.32	302.72	2602.08	312.55	1664.37	5.47	1.54	1664.9	1069.93	1275.15	239.62	280.46	290.32	302.72	-4.75	-3.53	5.11	2.535
MmugDNA.23935.1.S1_at	GRID1: glutamate receptor, ionotropic, delta 1	gDNA.Hs2.125988.1.S1	697629	MmugDNA.23935.1	16.77	20.41	18.73	20.24	102.93	135.74	121.51	6.19	3.58	56.21	59.83	35.97	16.77	20.41	18.73	20.24	-2.66	-1.49	4.425	2.535
MmugDNA.43150.1.S1_at	LOC716568: similar to Tumor protein D53 (hD53) (Tumor protein D52-like 1)	gDNA.g12246900	716568	MmugDNA.43150.1	6.89	6.15	10.68	12.58	27.9	33.99	23.17	3.19	1.48	40	90.15	55.6	6.89	6.15	10.68	12.58	-7.24	-3.58	5.215	2.53
MmugDNA.10797.1.S1_at	MmugDNA.10797.1	gDNA.Hs.274701.0.S2		MmugDNA.10797.1	43.38	42.53	32.2	44.44	309.08	164.32	229.45	5.62	3.57	151.12	122.01	140.13	43.38	42.53	32.2	44.44	-3.33	-1.48	4.475	2.525
MmuSTS.3271.1.S1_at	NEO1: neogenin homolog 1	60301348	705160	MmuSTS.3271.1	53.62	69.69	98.78	48.95	842.1	141.08	474.6	7.21	2.06	274.57	346.1	476.28	53.62	69.69	98.78	48.95	-5.36	-2.99	6.285	2.525
MmugDNA.30210.1.S1_at	LOC705111 /// LOC705234: similar to yeast INO80-like protein /// hypothetical protein LOC705234	gDNA.Hs.40193.1.A1	705111 /// 705234	MmugDNA.30210.1	67.22	66.73	41.18	94.15	317.62	341.5	305.39	4.79	3.67	114.68	118.16	127.33	67.22	66.73	41.18	94.15	-1.78	-1.36	3.285	2.515
MmugDNA.21837.1.S1_at	MAN1A2: mannosidase, alpha, class 1A, member 2	gDNA.Hs.239114.0.S4	711548	MmugDNA.21837.1	37.17	28.46	28.62	37.52	242.96	73.34	280.09	6.07	2.39	207.3	266.84	184.39	37.17	28.46	28.62	37.52	-6.82	-2.63	6.445	2.51
Mmu.7164.1.S1_at	DHX9: DEAH (Asp-Glu-Ala-His) box polypeptide 9	CO648532	715453	Mmu.7164.1	62.74	53.86	48.08	115.99	329.64	229.92	340.85	4.36	2.68	442.18	151	463.5	62.74	53.86	48.08	115.99	-5.06	-2.32	4.71	2.5
MmugDNA.20181.1.S1_at	MmugDNA.20181.1	gDNA.Hs.154331.0.A1		MmugDNA.20181.1	16.09	7.79	9.94	8.89	98.9	60.17	56.07	6.69	3.51	56.94	34.75	40.44	16.09	7.79	9.94	8.89	-3.97	-1.49	5.33	2.5
MmugDNA.2618.1.S1_at	MmugDNA.2618.1	gDNA.Hs.171437.0.A1		MmugDNA.2618.1	8.61	7.58	3.57	6.09	86.01	36.29	58.8	8.96	3.52	18	16.11	12.7	8.61	7.58	3.57	6.09	-2.41	-1.43	5.685	2.475
MmugDNA.33690.1.S1_at	LOC707441: similar to aconitase 2 precursor	gDNA.Hs.247772.0.S1	707441	MmugDNA.33690.1	89.98	97.39	68.65	75.17	224.01	168.13	236.98	2.57	1.49	335.85	383.43	452.46	89.98	97.39	68.65	75.17	-4.73	-3.45	3.65	2.47
MmugDNA.9237.1.S1_at	LOC694650: similar to Growth-arrest-specific protein 1 precursor (GAS-1)	gDNA.Hs.65029.0.S1	694650	MmugDNA.9237.1	6.06	13.79	9.21	7.22	64	36.73	34.45	5.24	2.73	33.42	48.23	29.15	6.06	13.79	9.21	7.22	-4.28	-2.21	4.76	2.47
MmugDNA.26412.1.S1_at	LOC694098: similar to WW domain containing E3 ubiquitin protein ligase 1	gDNA.Hs.324275.0.S1	694098	MmugDNA.26412.1	290.03	278.24	361.92	254.21	2002.32	1047.42	1725.46	5.45	3.22	1006.35	1170.15	909.67	290.03	278.24	361.92	254.21	-3.5	-1.71	4.475	2.465
MmugDNA.42493.1.S1_at	MmugDNA.42493.1	gDNA.Hs.132933.0.A1		MmugDNA.42493.1	14.33	1	1	5.31	126.03	44.48	34.22	13.5	3.29	25.64	13.26	21.95	14.33	1	1	5.31	-3.88	-1.62	8.69	2.455
MmugDNA.8532.1.S1_at	MmugDNA.8532.1	gDNA.Hs2.434244.1.S1		MmugDNA.8532.1	5.04	7.07	5.89	8.88	32.15	19.74	49.89	5.1	2.33	43.06	39.53	21.7	5.04	7.07	5.89	8.88	-5.34	-2.57	5.22	2.45
MmugDNA.6134.1.S1_at	MmugDNA.6134.1	gDNA.Hs2.17681.4.S1		MmugDNA.6134.1	1.89	2.81	3.17	3.23	38.18	34.58	3.51	9.07	2.2	14.7	11.66	20.27	1.89	2.81	3.17	3.23	-5.42	-2.68	7.245	2.44
MmugDNA.12790.1.S1_at	MmugDNA.12790.1	gDNA.g4502442		MmugDNA.12790.1	10.21	7.31	11.05	9.61	73.91	43.88	76.23	6.85	3.37	29.89	54.94	66.79	10.21	7.31	11.05	9.61	-5.08	-1.49	5.965	2.43
MmugDNA.8837.1.S1_at	KPNA4: karyopherin alpha 4	gDNA.g1928974	702486	MmugDNA.8837.1	115.43	85.77	125.74	119.05	644.64	380.27	742.79	5.32	3.52	255.44	197.81	211.39	115.43	85.77	125.74	119.05	-1.95	-1.34	3.635	2.43
MmugDNA.18112.1.S1_at	LOC697209: hypothetical protein LOC697209	gDNA.Hs.178269.0.A1	697209	MmugDNA.18112.1	10.64	4.81	3.88	4.86	152.05	45.12	43.28	14.29	3.23	15.6	25.62	23.08	10.64	4.81	3.88	4.86	-3.65	-1.62	8.97	2.425
MmugDNA.22172.1.S1_at	MmugDNA.22172.1	gDNA.Hs.270378.0.A1		MmugDNA.22172.1	1.03	6.92	4.97	8.24	15.76	16.5	25.7	3.77	1.98	29.62	18.06	31.32	1.03	6.92	4.97	8.24	-5.11	-2.86	4.44	2.42
MmugDNA.967.1.S1_at	MmugDNA.967.1	gDNA.Hs.306404.0.S1		MmugDNA.967.1	1.81	1.58	2.08	1.64	16.4	15.52	8.03	7.59	3.61	3.83	3.34	6.32	1.81	1.58	2.08	1.64	-2.68	-1.21	5.135	2.41
MmugDNA.26691.1.S1_at	LOC717811: similar to signal-regulatory protein alpha precursor	gDNA.g1864010	717811	MmugDNA.26691.1	28.82	46.13	33.7	55.47	162.98	297.87	150.89	4.99	2.28	144.68	177.58	181.91	28.82	46.13	33.7	55.47	-4.2	-2.53	4.595	2.405
MmugDNA.2054.1.S1_at	SLC6A6: solute carrier family 6 (neurotransmitter transporter, taurine), member 6	gDNA.g4507044	701172	MmugDNA.2054.1	5.19	11.76	13.46	12.53	116.21	30.77	73.46	7.12	2.92	46.78	26.62	39.79	5.19	11.76	13.46	12.53	-3.5	-1.88	5.31	2.4
Mmu.10030.1.S1_at	LOC698381: similar to syntenin isoform 3	CN646481	698381	Mmu.10030.1	420.6	549.82	683.18	424.17	2422.02	627.31	2525.2	3.6	1.49	2552.94	2122.01	2294.25	420.6	549.82	683.18	424.17	-4.54	-3.3	4.07	2.395
MmugDNA.5435.1.S1_at	LOC708207: similar to CG8312-PA, isoform A	gDNA.Hs.39168.0.A1	708207	MmugDNA.5435.1	23.93	19.29	29.65	23.45	92.8	31.64	63.13	2.76	1.28	151.34	149.35	86.03	23.93	19.29	29.65	23.45	-5.45	-3.51	4.105	2.395
MmugDNA.16226.1.S1_at	MmugDNA.16226.1	gDNA.Hs2.399806.1.S1		MmugDNA.16226.1	13.32	9.42	6.89	12.66	68.41	69.04	99.8	7.87	3.58	23.39	28.82	47.08	13.32	9.42	6.89	12.66	-3.19	-1.2	5.53	2.39
MmunewRS.432.1.S1_at	LOC706491: similar to haloacid dehalogenase-like hydrolase domain containing 4	23308748	706491	MmunewRS.432.1	12.79	33.17	30.7	25.06	141.03	143.11	57.46	4.7	2.23	109.81	99.65	125.43	12.79	33.17	30.7	25.06	-4.64	-2.53	4.67	2.38
Mmu.2935.3.S1_s_at	HLA-G: major histocompatibility complex, class I, G	U55065.1	719787	Mmu.2935.3	47.27	35.75	43.64	39.14	135.17	64.26	213.75	3.31	1.26	198.51	357.9	189.09	47.27	35.75	43.64	39.14	-6	-3.48	4.655	2.37
MmugDNA.34428.1.S1_s_at	LOC718494: similar to Glyoxylate reductase/hydroxypyruvate reductase	gDNA.Hs.155742.1.A1	718494	MmugDNA.34428.1	69.16	68.04	93.22	77.14	439.27	248.83	568.51	5.51	3.04	195.65	331.48	286.98	69.16	68.04	93.22	77.14	-3.46	-1.7	4.485	2.37
MmugDNA.28511.1.S1_s_at	LOC714244: similar to SP110 nuclear body protein isoform c	gDNA.g4758585	714244	MmugDNA.28511.1	5.56	4.25	10.49	8.77	22.87	30.16	21.08	3.26	1.61	49.5	33.57	34.19	5.56	4.25	10.49	8.77	-5.33	-3.13	4.295	2.37
MmugDNA.35058.1.S1_at	LOC698964: similar to RAS p21 protein activator 3	gDNA.g12545409	698964	MmugDNA.35058.1	28.22	21.19	22.89	26.78	153.62	95.96	178.07	5.69	3.45	131.63	60.75	88.24	28.22	21.19	22.89	26.78	-3.52	-1.29	4.605	2.37
MmugDNA.5169.1.S1_at	EFHC1: EF-hand domain (C-terminal) containing 1	gDNA.g8922435	708517	MmugDNA.5169.1	12.59	12.28	8.98	7.54	44.67	44.81	38.77	4.04	2.46	47.42	43.81	37.86	12.59	12.28	8.98	7.54	-4.12	-2.27	4.08	2.365
MmugDNA.39570.1.S1_at	MmugDNA.39570.1	gDNA.Hs2.236745.1.A1		MmugDNA.39570.1	2.63	16.22	11.04	23.45	64.81	123.73	118.07	7.45	3.04	36.68	47.83	31.69	2.63	16.22	11.04	23.45	-2.93	-1.68	5.19	2.36
MmugDNA.20157.1.S1_at	LOC701438: similar to nel-like 1 precursor	gDNA.g5453763	701438	MmugDNA.20157.1	19.97	33.14	31.38	35.92	110.59	198.42	153.89	5.22	3.4	61.04	98.71	47.32	19.97	33.14	31.38	35.92	-2.29	-1.28	3.755	2.34
MmugDNA.39726.1.S1_at	LOC698122: hypothetical protein LOC698122	gDNA.Hs.190450.0.A1	698122	MmugDNA.39726.1	11.53	15.95	16.28	12.07	38.3	40.15	30.36	2.68	1.39	65.26	86.77	127.79	11.53	15.95	16.28	12.07	-6.55	-3.29	4.615	2.34
MmugDNA.26748.1.S1_at	LOC713036: similar to mitochondrial ribosomal protein L51	gDNA.g13620918	713036	MmugDNA.26748.1	196.33	180.06	158.56	189.25	629.33	406.85	813.4	3.42	2.32	455.56	469.35	481.86	196.33	180.06	158.56	189.25	-2.59	-2.35	3.005	2.335
MmunewRS.336.1.S1_at	LOC696728: similar to olfactory receptor, family 1, subfamily L, member 6	52546686	696728	MmunewRS.336.1	10.6	7.35	15.52	17.55	37.04	105.59	37.19	4.66	1.24	76.28	75.79	50.92	10.6	7.35	15.52	17.55	-5.36	-3.42	5.01	2.33
MmugDNA.1926.1.S1_at	MmugDNA.1926.1	gDNA.Hs.210431.0.S1		MmugDNA.1926.1	4.54	4.45	2.4	4.85	56.1	71.47	43.33	13.36	3.44	11.54	8.72	15.23	4.54	4.45	2.4	4.85	-2.95	-1.22	8.155	2.33
MmunewRS.406.1.S1_at	LOC700172: hypothetical protein LOC700172	27734884	700172	MmunewRS.406.1	8.66	9.29	14.42	13.2	56.5	33.25	48.12	3.82	2.49	48.56	33.94	33.83	8.66	9.29	14.42	13.2	-3.25	-2.17	3.535	2.33
MmugDNA.32544.1.S1_at	LOC717280: similar to CG5038-PA	gDNA.Hs.172963.0.S1	717280	MmugDNA.32544.1	7.15	18.27	22.22	12.43	93.28	33.78	44.29	3.72	1.25	104.52	116.78	55.47	7.15	18.27	22.22	12.43	-6.22	-3.41	4.97	2.33
MmuSTS.2112.1.S1_at	LOC718894: similar to gamma isoform of regulatory subunit B56, protein phosphatase 2A isoform a	47776998	718894	MmuSTS.2112.1	23.8	75.68	79.49	58.97	287.65	297.67	693.89	7.4	3.21	269.35	199.41	217.28	23.8	75.68	79.49	58.97	-3.9	-1.44	5.65	2.325
MmugDNA.9397.1.S1_at	MmugDNA.9397.1	gDNA.Hs.137731.0.S1		MmugDNA.9397.1	1	1.7	1.47	2.77	15.64	24.86	14.49	11.78	3.31	9.1	4.4	7.56	1	1.7	1.47	2.77	-4.78	-1.34	8.28	2.325
MmugDNA.34989.1.S1_at	LOC719036: similar to T-cell death associated gene	gDNA.g6679302	719036	MmugDNA.34989.1	56.47	55.29	61.09	76.03	390.76	384.2	206.91	5.24	2.74	295.45	195.76	194.49	56.47	55.29	61.09	76.03	-3.6	-1.89	4.42	2.315
MmuSTS.4536.1.S1_at	LOC709493: similar to alpha 2 type VI collagen isoform 2C2 precursor	56089199	709493	MmuSTS.4536.1	124.23	121.6	121.36	129.5	364.76	223.72	265.11	2.29	1.24	546.68	799.66	561.83	124.23	121.6	121.36	129.5	-5.08	-3.38	3.685	2.31
MmugDNA.42344.1.S1_at	ADPRH: ADP-ribosylarginine hydrolase	gDNA.Hs.300425.0.A1	712562	MmugDNA.42344.1	35.53	28.43	33.67	27.03	264.84	162.6	129.78	6.1	3.3	75.79	74.66	68.71	35.53	28.43	33.67	27.03	-2.37	-1.32	4.235	2.31
MmugDNA.41444.1.S1_at	RCHY1: ring finger and CHY zinc finger domain containing 1	gDNA.Hs.48297.0.S2	701580	MmugDNA.41444.1	12.83	12.46	13.06	14.98	90.23	47	74.8	5.21	2.63	52.61	54.44	45.85	12.83	12.46	13.06	14.98	-3.78	-1.98	4.495	2.305
Mmu.7683.1.S1_at	EIF3S6IP: eukaryotic translation initiation factor 3 subunit 6 interacting protein	CO646186	699189	Mmu.7683.1	295.62	292.38	256.26	442.93	1337.31	370.24	1860.9	3.76	1.39	1470.26	1680.31	1565.47	295.62	292.38	256.26	442.93	-4.97	-3.22	4.365	2.305
MmugDNA.38372.1.S1_at	MmugDNA.38372.1	gDNA.Hs.293219.0.A1		MmugDNA.38372.1	7.59	1.42	12.4	8.93	62.84	27.71	110.5	9.19	3.14	18.84	28.24	22.03	7.59	1.42	12.4	8.93	-3.11	-1.46	6.15	2.3
MmugDNA.6935.1.S1_s_at	LOC718948: similar to BCL2-associated X protein isoform alpha	gDNA.g841237	718948	MmugDNA.6935.1	38.1	64.94	75.13	73.2	288.82	180.32	130.04	3.15	1.57	519.07	244.12	291.69	38.1	64.94	75.13	73.2	-5.55	-3.03	4.35	2.3
MmugDNA.62.1.S1_at	LOC714291: similar to CUG triplet repeat, RNA binding protein 2	gDNA.Hs2.211610.4.S1	714291	MmugDNA.62.1	29.82	43.49	36.78	21.66	449.94	25.4	893.5	13.95	1.21	181.92	337.79	207.13	29.82	43.49	36.78	21.66	-7.23	-3.38	10.59	2.295
MmugDNA.31633.1.S1_at	LOC697430: similar to UDP-N-acetyl-alpha-D-galactosamine:polypeptide N-acetylgalactosaminyltransferase 5 (GalNAc-T5)	gDNA.Hs.55968.0.S1	697430	MmugDNA.31633.1	4.69	27.69	18.27	17.49	86.82	63.78	35.57	3.74	1.64	53.36	184.43	128.81	4.69	27.69	18.27	17.49	-7.51	-2.95	5.625	2.295
MmuSTS.1397.1.S1_at	LOC718307: similar to Complement C1q subcomponent subunit B precursor	49533084	718307	MmuSTS.1397.1	3.3	1	1.66	1.64	12.7	13.06	9.82	6.89	2.77	8.29	10.31	7.61	3.3	1	1.66	1.64	-5.36	-1.81	6.125	2.29
MmuSTS.3659.1.S1_at	CLEC3A: similar to C-type lectin domain family 3 member A precursor (C-type lectin superfamily member 1) (Cartilage-derived C-type lectin)	51853687	713054	MmuSTS.3659.1	3.01	3.32	2.26	2.93	55.8	196.42	36.15	33.66	3.15	9.51	10.45	10.98	3.01	3.32	2.26	2.93	-3.66	-1.42	18.66	2.285
MmugDNA.27256.1.S1_at	LOC719074: similar to Acyl-protein thioesterase 2 (Lysophospholipase II) (LPL-I)	gDNA.Hs.283655.2.S1	719074	MmugDNA.27256.1	39.31	27.44	26.1	38.55	210.46	108.85	74.43	4.2	1.53	194.96	167.39	167.01	39.31	27.44	26.1	38.55	-5.51	-3.04	4.855	2.285
MmugDNA.8306.1.S1_at	MmugDNA.8306.1	gDNA.Hs.36958.0.A1		MmugDNA.8306.1	7.91	5.29	2.71	6.27	29.13	21.75	28.06	4.98	2.71	23.33	19.52	16.99	7.91	5.29	2.71	6.27	-3.76	-1.85	4.37	2.28
MmugDNA.11039.1.S1_at	MmugDNA.11039.1	gDNA.Hs.47431.2.A1		MmugDNA.11039.1	27.91	16.05	11.21	17.95	125.49	43.45	57.52	4.11	1.33	95.41	203.08	120.29	27.91	16.05	11.21	17.95	-7.72	-3.22	5.915	2.275
MmuSTS.3935.1.S1_s_at	STAT5: signal transducer and activator of transcription 5A	47777161	574129	MmuSTS.3935.1	27.45	20.29	19.68	27.29	64.31	63.41	80.22	3	1.7	104.49	101.48	86.67	27.45	20.29	19.68	27.29	-4.16	-2.85	3.58	2.275
MmugDNA.41509.1.S1_at	ABCB8: ATP-binding cassette, sub-family B, member 8	gDNA.g9955964	714341	MmugDNA.41509.1	25.67	24.48	26.86	22.91	131.87	169.23	93.94	4.98	2.58	68.3	103.13	95.06	25.67	24.48	26.86	22.91	-3.46	-1.95	4.22	2.265
MmugDNA.23846.1.S1_at	LOC700536: similar to actin related protein 2/3 complex subunit 2	gDNA.Hs.252280.1.A1	700536	MmugDNA.23846.1	615.2	800.74	734.78	722.41	1980.49	976.37	1981.65	2.32	1.43	2884.25	2953.77	2906.9	615.2	800.74	734.78	722.41	-4.08	-3.09	3.2	2.26
MmugDNA.13750.1.S1_at	LOC716071: hypothetical protein LOC716071	gDNA.g13384596	716071	MmugDNA.13750.1	104.15	150.96	60.44	130.41	200.2	292.67	180.1	2.04	1.2	584.73	502.95	430.71	104.15	150.96	60.44	130.41	-4.69	-3.31	3.365	2.255
MmugDNA.18045.1.S1_at	KLHDC5: kelch domain containing 5	gDNA.Hs.51743.0.S2	711593	MmugDNA.18045.1	19.27	49.87	20.91	25.85	124.25	63.24	209.98	4.49	1.44	205.43	127.4	167.1	19.27	49.87	20.91	25.85	-5.84	-3.07	5.165	2.255
MmugDNA.20053.1.S1_at	MmugDNA.20053.1	gDNA.g7657622		MmugDNA.20053.1	266.4	140.38	234.28	156.12	1692.83	480.8	856.09	4.98	1.94	712.83	903.23	788.55	266.4	140.38	234.28	156.12	-3.94	-2.57	4.46	2.255
MmugDNA.22474.1.S1_at	LOC706173: similar to type I hair keratin 1	gDNA.g4504920	706173	MmugDNA.22474.1	6.49	2.93	4.34	4.83	25.55	31.34	27.52	6.44	3.27	10.16	9.31	15.64	6.49	2.93	4.34	4.83	-2.66	-1.24	4.55	2.255
MmugDNA.1631.1.S1_at	MmugDNA.1631.1	gDNA.Hs.31720.0.S2		MmugDNA.1631.1	1.45	1.58	1.98	1	4.4	17.65	30.93	11.31	2.67	8.49	3.52	11.65	1.45	1.58	1.98	1	-5.11	-1.84	8.21	2.255
Mmu.8073.1.S1_at	LOC714584: similar to chromosome 1 open reading frame 21	CO583274	714584	Mmu.8073.1	135.36	98.52	135.98	95.55	337.11	320.21	357.61	2.92	1.48	429.3	688.23	623.91	135.36	98.52	135.98	95.55	-4.88	-3	3.9	2.24
MmugDNA.36663.1.S1_at	MED12: mediator of RNA polymerase II transcription, subunit 12 homolog	gDNA.g4827041	696791	MmugDNA.36663.1	27.94	20.39	23.47	32.05	153.45	95.47	160.93	5.32	3.01	74.55	67.97	55.56	27.94	20.39	23.47	32.05	-2.55	-1.45	3.935	2.23
MmugDNA.15390.1.S1_s_at	LOC701711: similar to plasma glutamate carboxypeptidase	gDNA.g7706386	701711	MmugDNA.15390.1	37.92	31.52	33.99	32.81	181.28	164.16	98.75	4.26	2.56	108.45	181.95	122.41	37.92	31.52	33.99	32.81	-3.91	-1.89	4.085	2.225
Mmu.10150.1.S1_at	PSMD11: proteasome 26S non-ATPase subunit 11	CN648625	717953	Mmu.10150.1	254.2	389.64	485.97	353.47	2766.44	992.12	2554.28	5.76	3.08	925.94	563.33	1022.58	254.2	389.64	485.97	353.47	-2.24	-1.37	4	2.225
MmugDNA.17142.1.S1_at	MmugDNA.17142.1	gDNA.g11055979		MmugDNA.17142.1	26.46	30.81	40.24	32.92	163.6	198.36	117.91	4.8	3.02	54.36	76.77	69.64	26.46	30.81	40.24	32.92	-2.02	-1.43	3.41	2.225
MmugDNA.5950.1.S1_at	LOC708132: similar to poly (ADP-ribose) polymerase family, member 10	gDNA.Hs.135106.0.A1	708132	MmugDNA.5950.1	41.68	37.57	28.93	34.38	222.82	60.89	153.35	4.13	1.9	113.66	158.11	114.46	41.68	37.57	28.93	34.38	-3.71	-2.52	3.92	2.21
MmugDNA.29209.1.S1_at	MmugDNA.29209.1	gDNA.Hs2.148537.1.S1		MmugDNA.29209.1	5.15	5.54	3.57	1	70.13	51.47	9.52	12.04	3.09	16.99	11.76	6.65	5.15	5.54	3.57	1	-3.2	-1.33	7.62	2.21
MmugDNA.37385.1.S1_at	LOC694630: similar to MAX interactor 1 isoform b	gDNA.g5174596	694630	MmugDNA.37385.1	155.74	190.23	239.42	225.22	1829.6	483.92	2020.29	7.2	3.15	660.29	679.51	301.43	155.74	190.23	239.42	225.22	-2.63	-1.25	4.915	2.2
MmuSTS.165.1.S1_at	LOC710290: similar to inhibitor of DNA binding 3	51853843	710290	MmuSTS.165.1	207.78	107.49	635.75	324.16	1520.6	810.35	2018.22	4.83	2.17	1572.35	1139.31	1533.84	207.78	107.49	635.75	324.16	-4.7	-2.23	4.765	2.2
MmuSTS.4470.1.S1_at	VAT1: vesicle amine transport protein 1	60543297	712490	MmuSTS.4470.1	483.33	486.47	450.75	421.48	1876.89	1337.32	2252.65	3.91	2.49	1570.53	1741.45	1243.04	483.33	486.47	450.75	421.48	-3.26	-1.9	3.585	2.195
MmugDNA.6228.1.S1_at	DRG2: developmentally regulated GTP binding protein 2	gDNA.Hs.78582.0.S1	699952	MmugDNA.6228.1	84.92	42.81	50.15	43.44	305.89	170.43	264.58	4.72	2.67	151.54	148.22	176.68	84.92	42.81	50.15	43.44	-2.99	-1.72	3.855	2.195
MmugDNA.9304.1.S1_at	LOC702304: hypothetical protein LOC702304	gDNA.Hs.32433.0.A1	702304	MmugDNA.9304.1	5.48	7.96	5.41	17.34	104.77	21.83	93	8.81	3.11	59	31.68	20.76	5.48	7.96	5.41	17.34	-4.26	-1.27	6.535	2.19
MmugDNA.30249.1.S1_s_at	CLEC11A: similar to C-type lectin domain family 11 member A precursor (Stem cell growth factor) (Lymphocyte secreted C-type lectin) (p47) (C-type lectin superfamily member 3)	gDNA.g13543291	719381	MmugDNA.30249.1	79.17	61.78	67.17	74.14	394.51	300.09	260.45	4.51	3.04	122.52	169.18	114.66	79.17	61.78	67.17	74.14	-1.93	-1.33	3.22	2.185
MmugDNA.2754.1.S1_at	LOC716805: similar to plexin A1	gDNA.Hs2.398130.1.S1	716805	MmugDNA.2754.1	26.68	14.58	13.84	19.16	35.47	87.86	94.92	3.83	1.63	79.93	96.68	89	26.68	14.58	13.84	19.16	-4.7	-2.74	4.265	2.185
MmugDNA.2895.1.S1_at	LOC697961: similar to twinfilin-like protein	gDNA.g6005845	697961	MmugDNA.2895.1	190.54	159.82	181.2	181.85	346.01	382.6	382.57	2.07	1.57	558.48	675.33	694.51	190.54	159.82	181.2	181.85	-3.6	-2.79	2.835	2.18
MmugDNA.24957.1.S1_at	LOC709097: similar to chromosome 20 open reading frame 165	gDNA.Hs2.128235.1.S1	709097	MmugDNA.24957.1	21.09	6.99	6.87	6.91	87.6	63.18	65.49	6.67	3.1	33.08	29.43	24.43	21.09	6.99	6.87	6.91	-2.64	-1.25	4.655	2.175
MmugDNA.35591.1.S1_at	LOC693785: hypothetical protein LOC693785	gDNA.Hs.250655.0.S1	693785	MmugDNA.35591.1	346.61	228.34	251.66	241.6	2135.14	491.18	1578.63	5.34	1.61	1824.11	1339.13	1959.39	346.61	228.34	251.66	241.6	-6.53	-2.74	5.935	2.175
MmugDNA.39695.1.S1_at	LOC714538: similar to PHD finger protein 23	gDNA.Hs2.433631.1.S1	714538	MmugDNA.39695.1	116.5	74.61	123.16	94.33	3310.37	1362.16	429.18	16.56	2.97	183.84	174.79	186.76	116.5	74.61	123.16	94.33	-1.76	-1.37	9.16	2.17
MmugDNA.28678.1.S1_at	HSD17B8: similar to Estradiol 17-beta-dehydrogenase 8 (17-beta-HSD 8) (17-beta-hydroxysteroid dehydrogenase 8) (Protein Ke6) (Ke-6)	gDNA.Hs.288354.0.S1	718119	MmugDNA.28678.1	26.57	20.41	24.96	45.33	179.16	81.49	147.55	4.81	2.66	78.76	149.53	82.84	26.57	20.41	24.96	45.33	-3.48	-1.66	4.145	2.16
Mmu.2883.1.S1_at	LOC697172: similar to complement component 7 precursor	CO580930	697172	Mmu.2883.1	7.13	12.2	13.31	11.12	31.86	90.8	65.33	5.8	2.42	30.23	37.45	29.55	7.13	12.2	13.31	11.12	-3	-1.88	4.4	2.15
MmugDNA.7335.1.S1_at	MmugDNA.7335.1	gDNA.Hs.248208.0.S1		MmugDNA.7335.1	1	2.94	2.33	1.87	16.69	41.43	13.38	12.8	2.89	9.53	5.27	6.41	1	2.94	2.33	1.87	-3.81	-1.41	8.305	2.15
MmugDNA.23808.1.S1_at	MmugDNA.23808.1	gDNA.Hs2.438422.1.S1		MmugDNA.23808.1	2.68	1.3	1.07	1.15	5.49	19.52	15.32	9.84	2.71	4.62	6.9	7.29	2.68	1.3	1.07	1.15	-4.47	-1.58	7.155	2.145
MmunewRS.293.1.S1_at	LOC703456: similar to integrin, alpha 1 precursor	31657141	703456	MmunewRS.293.1	3.4	2.68	2.82	4.13	11.66	5.64	11.48	2.99	1.48	21.44	9.39	34.89	3.4	2.68	2.82	4.13	-6.89	-2.81	4.94	2.145
MmugDNA.3343.1.S1_s_at	MmugDNA.3343.1	gDNA.Hs.311405.0.A1		MmugDNA.3343.1	113.35	73.44	157.88	130.7	614.03	186.99	1156.77	5.46	1.49	640.48	362.17	732.21	113.35	73.44	157.88	130.7	-4.81	-2.8	5.135	2.145
MmugDNA.37948.1.S1_at	MmugDNA.37948.1	gDNA.Hs.105925.0.S2		MmugDNA.37948.1	7.74	6.34	2.19	5.23	20.25	20.42	25.44	4.18	2.15	18.69	15.77	30.3	7.74	6.34	2.19	5.23	-3.99	-2.11	4.085	2.13
MmugDNA.19623.1.S1_s_at	LOC708415 /// LOC722929: similar to tubulin, beta /// similar to tubulin, beta 2	gDNA.Hs.179661.3.S1	708415 /// 722929	MmugDNA.19623.1	185.24	159.9	217.97	190.55	658.8	329.91	722.13	3.04	1.85	665.21	519.77	585.93	185.24	159.9	217.97	190.55	-3.14	-2.41	3.09	2.13
MmugDNA.5731.1.S1_at	MmugDNA.5731.1	gDNA.Hs.154840.0.A1		MmugDNA.5731.1	9.76	7.31	6.52	2.87	44.44	8.31	38.86	4.56	1.51	53.29	27.27	34.78	9.76	7.31	6.52	2.87	-5.6	-2.74	5.08	2.125
MmugDNA.33533.1.S1_x_at	LOC710452: similar to HLA class I histocompatibility antigen, Cw-4 alpha chain precursor (MHC class I antigen Cw*4)	gDNA.g184213	710452	MmugDNA.33533.1	21.13	21.56	15.58	27.04	118.11	339.06	111.24	8.71	2.13	136.16	148.57	93.3	21.13	21.56	15.58	27.04	-5.66	-2.12	7.185	2.125
MmugDNA.38277.1.S1_at	LOC713919: similar to protein kinase C and casein kinase substrate in neurons 3	gDNA.g7705894	713919	MmugDNA.38277.1	21.91	48.39	13.32	18.71	213.94	58.02	144.85	5.69	2.36	90.24	79.37	83.25	21.91	48.39	13.32	18.71	-3.44	-1.89	4.565	2.125
MmugDNA.1581.1.S1_at	PFDN5: similar to prefoldin subunit 5 isoform gamma	gDNA.g4505742	702355	MmugDNA.1581.1	441.24	361.78	273.74	464.33	1992.27	461.66	1850.27	3.82	1.53	1698.51	1656.25	1415.92	441.24	361.78	273.74	464.33	-4.23	-2.72	4.025	2.125
RPTR-Mmu-E00696-1_s_at	E00696-1	RPTR-Mmu-E00696-1		E00696-1	10.37	7.64	4.93	10.18	38.98	74.18	35.3	5.91	2.86	14.26	19.47	26.21	10.37	7.64	4.93	10.18	-2.41	-1.39	4.16	2.125
MmuSTS.4243.1.S1_at	PPM1F: protein phosphatase 1F	60543241	698441	MmuSTS.4243.1	46.87	49.98	45.93	44.68	201.45	136.76	181.06	3.7	2.81	93.53	93.41	70.95	46.87	49.98	45.93	44.68	-1.84	-1.43	2.77	2.12
MmugDNA.30132.1.S1_at	MmugDNA.30132.1	gDNA.Hs.296406.1.A1		MmugDNA.30132.1	18.36	20.94	23.33	27.58	75.61	69.18	73.11	3.25	2.17	71.36	66.16	53.96	18.36	20.94	23.33	27.58	-2.85	-2.07	3.05	2.12
MmugDNA.13617.1.S1_at	GMIP: GEM interacting protein	gDNA.g7706106	720380	MmugDNA.13617.1	18.98	14.43	23.44	25.63	241.41	28.75	371.62	10.55	2.39	67.05	44.88	86.05	18.98	14.43	23.44	25.63	-3.21	-1.84	6.88	2.115
MmugDNA.36979.1.S1_at	LOC699338: similar to slit and trk like 6	gDNA.Hs.120910.0.A1	699338	MmugDNA.36979.1	2.58	1.34	3.97	4.38	15.6	11.14	22.12	6	2.74	11.69	7.41	11.15	2.58	1.34	3.97	4.38	-3.49	-1.48	4.745	2.11
MmugDNA.16048.1.S1_at	LOC705731: similar to Pleckstrin homology domain-containing family A member 1 (Tandem PH domain-containing protein 1) (TAPP-1)	gDNA.Hs.287830.0.A1	705731	MmugDNA.16048.1	111.96	104.27	93.84	98.56	1205.03	224.1	1144.9	8.42	2.85	528.78	296.94	383.35	111.96	104.27	93.84	98.56	-3.79	-1.37	6.105	2.11
Mmu.15814.5.S1_at	EEF1A1 /// LOC704199 /// LOC704438 /// LOC708096 /// LOC709017 /// LOC710682 /// LOC722466: similar to eukaryotic translation elongation factor 1 alpha 2 /// similar to eukaryotic translation elongation factor 1 alpha 1 /// eukaryotic translation elongation factor 1 alpha 1	CO647217	704199 /// 704438 /// 708096 /// 709017 /// 710682 /// 716010 /// 722466	Mmu.15814.5	1.35	1.65	2.71	1.29	3.29	34.94	42.99	16.35	2.79	11.45	6.94	3.22	1.35	1.65	2.71	1.29	-4.3	-1.42	10.325	2.105
Mmu.8262.1.S1_at	FBXO7: F-box only protein 7	CB552471	717317	Mmu.8262.1	27.05	92.26	50.05	51.75	177.45	164.27	131.41	2.85	1.79	336.18	155.88	228.22	27.05	92.26	50.05	51.75	-4.37	-2.41	3.61	2.1
MmugDNA.15171.1.S1_at	MmugDNA.15171.1	gDNA.Hs2.282392.1.S1		MmugDNA.15171.1	2.58	1.55	3.72	2.36	38.14	55.84	3.27	13.05	2.28	10.19	21.85	11.59	2.58	1.55	3.72	2.36	-5.74	-1.92	9.395	2.1
MmugDNA.17437.1.S1_at	MAPK8IP3: mitogen-activated protein kinase 8 interacting protein 3	gDNA.Hs.199417.0.S1	702388	MmugDNA.17437.1	6.4	4.91	1.82	2.06	44.83	9.48	34.87	8.45	2.98	10.85	7.46	10.51	6.4	4.91	1.82	2.06	-2.48	-1.22	5.465	2.1
MmugDNA.24579.1.S1_at	MmugDNA.24579.1	gDNA.Hs.234392.2.A1		MmugDNA.24579.1	61.41	66.17	66.36	71.54	141.5	254.62	176.15	2.83	1.8	198.23	209.48	239.51	61.41	66.17	66.36	71.54	-3.27	-2.39	3.05	2.095
MmugDNA.18685.1.S1_s_at	NR4A1: nuclear receptor subfamily 4, group A, member 1	gDNA.g4504440	696797	MmugDNA.18685.1	113.58	145.43	180.05	110.79	268.17	345.18	779.76	3.4	1.26	801.44	700.32	474.49	113.58	145.43	180.05	110.79	-4.78	-2.93	4.09	2.095
MmugDNA.16597.1.S1_at	CNTFR: ciliary neurotrophic factor receptor	gDNA.g4502930	700959	MmugDNA.16597.1	22.46	14.85	15.78	16.35	92.19	72.98	155.38	6.17	2.91	38.35	36.96	34.1	22.46	14.85	15.78	16.35	-2.13	-1.28	4.15	2.095
Mmu.12027.2.S1_at	LOC701611 /// LOC707228 /// LOC709112: similar to heterogeneous nuclear ribonucleoprotein K /// similar to heterogeneous nuclear ribonucleoprotein K isoform a	BM423131	701611 /// 707228 /// 709112	Mmu.12027.2	1.85	1.85	2.89	2.7	67.02	29.26	11.33	16.48	2.92	13.81	11.48	4.55	1.85	1.85	2.89	2.7	-4.59	-1.24	10.535	2.08
MmugDNA.39700.1.S1_at	MmugDNA.39700.1	gDNA.Hs.97570.0.A1		MmugDNA.39700.1	27.26	22.52	25.52	24.27	146.1	174.7	91.26	5.51	2.77	44.03	114.79	76.93	27.26	22.52	25.52	24.27	-3.13	-1.39	4.32	2.08
MmugDNA.37145.1.S1_at	MmugDNA.37145.1	gDNA.Hs.1526.2.S1		MmugDNA.37145.1	3.5	11.58	6.17	4.25	49.78	24.5	15.96	5.26	1.67	36.79	20.26	41.49	3.5	11.58	6.17	4.25	-5.77	-2.48	5.515	2.075
MmugDNA.24927.1.S1_at	STOML2: stomatin (EPB72)-like 2	gDNA.Hs.3439.1.S1	698458	MmugDNA.24927.1	97.56	109.21	113.23	101.89	280.91	319.49	740.9	4.24	1.71	512.29	400.38	478.22	97.56	109.21	113.23	101.89	-4.35	-2.44	4.295	2.075
MmugDNA.10930.1.S1_s_at	HSF1: heat shock transcription factor 1	gDNA.Hs.1499.1.S1	714078	MmugDNA.10930.1	36.39	24.94	24.99	22.63	148.18	63.12	146.78	4.42	2.48	81.39	70.38	92.01	36.39	24.94	24.99	22.63	-3	-1.67	3.71	2.075
MmuSTS.2171.1.S1_at	LOC695171: similar to zinc finger protein 140 (clone pHZ-39)	55774100	695171	MmuSTS.2171.1	22.18	10.77	16.28	10.89	110.54	37.23	223.98	8.54	2.14	58.39	55.44	61.68	22.18	10.77	16.28	10.89	-4.02	-2	6.28	2.07
Mmu.16379.1.S1_at	LOC719383: similar to Translocon-associated protein beta subunit precursor (TRAP-beta) (Signal sequence receptor beta subunit) (SSR-beta)	CD767102	719383	Mmu.16379.1	560.79	470.06	582.35	476.84	1393.61	1437.41	971.02	2.38	1.66	1483.52	1668.54	1590.04	560.79	470.06	582.35	476.84	-3.03	-2.48	2.705	2.07
MmugDNA.4990.1.S1_at	MmugDNA.4990.1	gDNA.Hs.293740.0.S1		MmugDNA.4990.1	7.46	6.3	3.7	6.55	14.08	38.03	85.39	7.94	1.59	20.09	21.32	29.01	7.46	6.3	3.7	6.55	-4.16	-2.55	6.05	2.07
MmugDNA.18010.1.S1_at	LOC701641: similar to neurotrophic factor artemin isoform 3, precursor	gDNA.g4455084	701641	MmugDNA.18010.1	9.83	14.32	18.24	11.84	73.71	153.21	39.33	6.45	1.66	54.08	81.41	100.45	9.83	14.32	18.24	11.84	-5.56	-2.48	6.005	2.07
Mmu.4846.1.S1_at	ADSS: adenylosuccinate synthase	CN648804	713580	Mmu.4846.1	33.31	33.59	24.56	52.9	148.1	88.57	214.44	4.21	2.04	192.37	95.67	233.19	33.31	33.59	24.56	52.9	-4.79	-2.09	4.5	2.065
MmugDNA.26985.1.S1_at	MmugDNA.26985.1	gDNA.Hs.105093.0.A1		MmugDNA.26985.1	17.37	13.39	2.35	3.87	120.04	133.95	14.6	9.44	2.58	33.88	52.1	18.4	17.37	13.39	2.35	3.87	-3.65	-1.55	6.545	2.065
MmugDNA.40146.1.S1_at	LOC696351: similar to nuclear receptor co-repressor 1	gDNA.g5454137	696351	MmugDNA.40146.1	131.24	112.14	171.73	120.16	638.28	287.65	585.59	3.81	2.17	418.34	524.32	337.73	131.24	112.14	171.73	120.16	-3.19	-1.96	3.5	2.065
MmugDNA.16809.1.S1_at	LOC715175: similar to deltex 3 homolog	gDNA.Hs.32374.0.S1	715175	MmugDNA.16809.1	22.64	27.15	22.64	21.25	143.7	284.72	104.32	7.67	2.86	65.4	74.77	47.14	22.64	27.15	22.64	21.25	-2.63	-1.27	5.15	2.065
MmugDNA.40928.1.S1_s_at	LOC717725: similar to Cip1-interacting zinc finger protein	gDNA.g7188807	717725	MmugDNA.40928.1	83.81	59.29	93.49	65.46	177.91	138.54	285	2.72	1.6	241.81	327.98	242.85	83.81	59.29	93.49	65.46	-3.58	-2.52	3.15	2.06
MmugDNA.20490.1.S1_at	MmugDNA.20490.1	gDNA.g4557660		MmugDNA.20490.1	87.13	68.54	61.43	66.12	183.65	119.41	135.68	2.08	1.26	287.49	289.46	427.15	87.13	68.54	61.43	66.12	-4.72	-2.85	3.4	2.055
MmugDNA.10944.1.S1_at	LOC695674: similar to GTPase activating Rap/RanGAP domain-like 1 isoform 1	gDNA.Hs.167031.1.S1	695674	MmugDNA.10944.1	16.03	16.46	18.47	19.25	133.3	54.16	79.73	5.03	2.52	77.71	33.17	67.23	16.03	16.46	18.47	19.25	-3.26	-1.59	4.145	2.055
MmuSTS.1124.1.S1_at	LOC707246 /// LOC718616: hypothetical protein LOC707246 /// hypothetical protein LOC718616	59676468	707246 /// 718616	MmuSTS.1124.1	49.88	88.25	77.02	49.16	236.26	202.34	317.92	3.95	2.37	217.02	188.06	173.12	49.88	88.25	77.02	49.16	-2.93	-1.73	3.44	2.05
Mmu.13184.1.S1_x_at	Transcribed locus, moderately similar to XP_001094330.1 similar to Parathymosin, partial [Macaca mulatta]	CO580741		Mmu.13184.1	375.26	422.06	425.36	408.8	3274.87	1578.62	1473.69	5.2	2.76	642.99	1163.69	972.69	375.26	422.06	425.36	408.8	-2.22	-1.33	3.71	2.045
MmuSTS.3738.1.S1_at	PTPRF: protein tyrosine phosphatase, receptor type, F	49533462	701160	MmuSTS.3738.1	112.24	133.96	116.59	145.33	380.31	725.54	298.33	3.58	1.52	515.84	487.52	396.33	112.24	133.96	116.59	145.33	-3.67	-2.56	3.625	2.04
Mmu.12324.1.S1_at	LOC696756: similar to NS1-associated protein 1 isoform 2	CO646794	696756	Mmu.12324.1	106.78	252.43	307.38	109.87	2597.67	215.29	2437.91	9.37	2.29	798.06	492.22	838.21	106.78	252.43	307.38	109.87	-3.72	-1.78	6.545	2.035
MmugDNA.15511.1.S1_s_at	LOC718518: hypothetical protein LOC718518	gDNA.Hs.146428.1.A1	718518	MmugDNA.15511.1	219.93	256.47	289.81	271.66	893.82	521.78	850.77	2.88	1.71	900.14	994.14	768.72	219.93	256.47	289.81	271.66	-3.43	-2.34	3.155	2.025
MmugDNA.29009.1.S1_at	MmugDNA.29009.1	gDNA.Hs.13396.0.A1		MmugDNA.29009.1	67.34	45.81	33.06	30.47	165.31	238.2	106.82	3.87	1.88	175.76	203.71	143.66	67.34	45.81	33.06	30.47	-4	-2.16	3.935	2.02
Mmu.11961.1.S1_x_at	GBP1: guanylate binding protein 1, interferon-inducible, 67kD	CO647834	694283 /// 694538	Mmu.11961.1	12.03	1.75	9.29	8.23	13.99	23.15	17.84	2.32	1.25	24.72	81.75	50.37	12.03	1.75	9.29	8.23	-6.75	-2.79	4.535	2.02
MmuSTS.3544.1.S1_at	LOC694416: similar to Pre-B-cell leukemia transcription factor 1 (Homeobox protein PBX1)	49533405	694416	MmuSTS.3544.1	197.47	108.99	103.15	164.49	388.47	363.82	226.46	2.25	1.33	680.37	748.67	416.41	197.47	108.99	103.15	164.49	-4.33	-2.71	3.29	2.02
MmugDNA.31300.1.S1_s_at	GRIN1: glutamate receptor, ionotropic, N-methyl D-aspartate 1	gDNA.g2343286	574380	MmugDNA.31300.1	9.39	6.13	5.26	6.22	35.89	86.21	25	7.04	1.54	37.36	30.02	24.83	9.39	6.13	5.26	6.22	-4.5	-2.5	5.77	2.02
MmuSTS.1182.1.S1_at	LOC716810: similar to pleckstrin homology domain interacting protein	55167741	716810	MmuSTS.1182.1	54.33	66.05	65.52	68.43	534.33	87.59	1064.78	8.87	1.52	216.11	219.68	258.7	54.33	66.05	65.52	68.43	-3.62	-2.51	6.245	2.015
MmugDNA.29305.1.S1_s_at	ETV1: ets variant gene 1	gDNA.Hs.89566.2.S1	710318	MmugDNA.29305.1	60.29	33.02	43	42.43	269.2	175.57	326.27	6.07	2.09	586.42	182.92	257.95	60.29	33.02	43	42.43	-7.57	-1.94	6.82	2.015
MmugDNA.31892.1.S1_at	PTGS1: prostaglandin-endoperoxide synthase 1	gDNA.Hs.88474.0.A2	698213	MmugDNA.31892.1	15.78	9.69	8.06	9.96	41.2	33.72	43.07	3.79	1.41	70.57	65.04	34.43	15.78	9.69	8.06	9.96	-5.41	-2.62	4.6	2.015
MmugDNA.33319.1.S1_at	LOC718128: similar to CG14980-PB	gDNA.Hs.274128.0.A1	718128	MmugDNA.33319.1	13.22	16.71	20.69	18.54	55.01	134.78	93.11	5.51	2.74	29	38.72	39.37	13.22	16.71	20.69	18.54	-2.07	-1.28	3.79	2.01
MmugDNA.7048.1.S1_s_at	MmugDNA.7048.1	gDNA.Hs.194079.0.A1		MmugDNA.7048.1	2.77	2.08	4.56	2.18	26.09	3.79	21.19	6.19	1.6	15.55	19.38	11.68	2.77	2.08	4.56	2.18	-5.67	-2.42	5.93	2.01
MmugDNA.34353.1.S1_at	MmugDNA.34353.1	gDNA.g13376512		MmugDNA.34353.1	3.16	11.66	4.3	5.66	18.84	25.27	12.96	3.15	1.47	31.55	22.17	27.4	3.16	11.66	4.3	5.66	-4.44	-2.55	3.795	2.01
MmugDNA.2995.1.S1_at	MmugDNA.2995.1	gDNA.Hs.179481.0.A1		MmugDNA.2995.1	4.51	5.34	2.88	5.46	57.8	15.4	24.34	7.4	2.02	17.34	18.81	20.48	4.51	5.34	2.88	5.46	-4.26	-1.99	5.83	2.005
MmuSTS.3932.1.S1_at	COL5A3: collagen, type V, alpha 3	47776504	711418	MmuSTS.3932.1	27.15	37.1	36.3	30.62	105.98	157.53	86.38	3.44	1.35	947.57	49.09	552.84	27.15	37.1	36.3	30.62	-15.87	-2.65	9.655	2
MmugDNA.20590.1.S1_at	LOC711017: similar to zinc finger protein HIT-39	gDNA.Hs.301463.1.S2	711017	MmugDNA.20590.1	20.12	9.36	10.8	10.25	63.85	68.07	45.68	4.47	2.12	49.18	35.2	39.6	20.12	9.36	10.8	10.25	-3.26	-1.88	3.865	2
MmugDNA.17430.1.S1_s_at	LOC712161: similar to Transcription factor E3	gDNA.Hs.274184.1.S1	712161	MmugDNA.17430.1	208.01	245.37	262.43	187.85	476.89	328.89	621.47	2.08	1.35	706.18	967.02	694.91	208.01	245.37	262.43	187.85	-3.51	-2.65	2.795	2
MmugDNA.16181.1.S1_at	MmugDNA.16181.1	gDNA.Hs.103521.0.S1		MmugDNA.16181.1	13.57	13.12	14.23	13.22	31.29	51.4	43.6	3.01	1.26	86.65	76.38	71.97	13.57	13.12	14.23	13.22	-5.76	-2.71	4.385	1.985
Mmu.10858.1.S1_s_at	ACTR3: similar to ARP3 actin-related protein 3 homolog	CO583406	709836	Mmu.10858.1	347.17	527.78	733.03	469.88	1454.63	658.11	1585.35	2.37	1.26	2031.45	1670.88	2051.29	347.17	527.78	733.03	469.88	-3.72	-2.7	3.045	1.98
MmugDNA.41506.1.S1_at	ASB6: ankyrin repeat and SOCS box-containing 6	gDNA.Hs.3355.0.S3	716732	MmugDNA.41506.1	33.07	21.33	16.97	16.57	59.53	44.27	102.23	2.99	1.33	84.4	85.32	78.81	33.07	21.33	16.97	16.57	-3.81	-2.62	3.4	1.975
MmugDNA.32077.1.S1_at	MmugDNA.32077.1	gDNA.Hs2.382169.1.A1		MmugDNA.32077.1	1.84	4.62	3.94	6.04	41.25	15.11	12.66	6.17	1.75	16.48	18.31	15.01	1.84	4.62	3.94	6.04	-4.22	-2.19	5.195	1.97
MmugDNA.5603.1.S1_at	LOC703922: similar to NGFI-A binding protein 1	gDNA.g3282824	703922	MmugDNA.5603.1	12.83	14.11	14.83	8.57	86.28	35.58	184.71	8.21	2.21	39.09	32.61	36.76	12.83	14.11	14.83	8.57	-2.9	-1.72	5.555	1.965
MmugDNA.8550.1.S1_at	LOC702570: similar to opticin precursor	gDNA.g5639938	702570	MmugDNA.8550.1	4.54	3.07	4.43	3.87	189.36	53.85	32.72	23.61	2.52	12.06	13.01	12.46	4.54	3.07	4.43	3.87	-3.21	-1.41	13.41	1.965
MmugDNA.4261.1.S1_at	ETS1: similar to C-ets-1 protein (p54)	gDNA.Hs.248109.0.S1	714697	MmugDNA.4261.1	18.19	9.77	18.96	14.24	173.61	52.9	65.77	6.4	1.39	128.06	62.97	112.3	18.19	9.77	18.96	14.24	-6.3	-2.53	6.35	1.96
MmugDNA.20425.1.S1_at	IL9R: interleukin 9 receptor	gDNA.g4504684	704266	MmugDNA.20425.1	21.47	24.33	27.78	32.77	125.72	198.55	111.87	5.42	2.68	52.26	70.83	50.45	21.47	24.33	27.78	32.77	-2.15	-1.22	3.785	1.95
MmuSTS.2551.1.S1_at	IPO4 /// LOC715472: importin 4 /// similar to transmembrane 9 superfamily member 1 isoform a	62000407	715380 /// 715472	MmuSTS.2551.1	152.78	264.93	250.03	140.74	564.65	422.1	494.03	2.5	1.63	760.58	656.54	680.08	152.78	264.93	250.03	140.74	-3.53	-2.27	3.015	1.95
MmugDNA.36740.1.S1_at	MmugDNA.36740.1	gDNA.Hs2Affx.1.429.S1		MmugDNA.36740.1	48.37	39.78	36.34	39.73	156.57	95.18	137.32	3.14	1.7	365.25	147.53	155.16	48.37	39.78	36.34	39.73	-5.28	-2.18	4.21	1.94
MmugDNA.14099.1.S1_at	PDIA5: protein disulfide isomerase-associated 5	gDNA.g5803120	715226	MmugDNA.14099.1	175.81	116.23	79.21	109.95	546.64	150.99	438.63	3.18	1.23	425.52	830.79	682.4	175.81	116.23	79.21	109.95	-5.39	-2.65	4.285	1.94
Mmu.4423.1.S1_at	LOC709083: similar to myeloid/lymphoid or mixed lineage-leukemia translocation to 10 homolog	CO645361	709083	Mmu.4423.1	131.12	66.82	96.16	72.82	529.62	350.55	291.74	4.38	2.65	189.1	175.5	171.01	131.12	66.82	96.16	72.82	-2.01	-1.22	3.195	1.935
MmugDNA.25314.1.S1_at	MmugDNA.25314.1	gDNA.Hs.192298.0.A1		MmugDNA.25314.1	10.27	11.98	13.13	6.39	55.14	36.28	64.7	5.25	2.2	25.09	33.04	60.81	10.27	11.98	13.13	6.39	-3.74	-1.66	4.495	1.93
MmugDNA.14658.1.S1_at	LOC713331: similar to zinc finger protein 629	gDNA.Hs.301094.0.S1	713331	MmugDNA.14658.1	72.63	53.72	29.69	65.02	178.94	186.21	140.79	3.12	1.94	221.01	130.23	192.42	72.63	53.72	29.69	65.02	-3.33	-1.91	3.225	1.925
MmugDNA.8335.1.S1_at	MmugDNA.8335.1	gDNA.Hs.293253.0.S1		MmugDNA.8335.1	2.13	3.1	3.09	1.7	10.69	9.19	35.01	7.72	1.58	22.27	8.74	10.62	2.13	3.1	3.09	1.7	-5.95	-2.27	6.835	1.925
MmugDNA.13639.1.S1_at	ANGPTL2: angiopoietin-like 2	gDNA.g6912235	701444	MmugDNA.13639.1	22.38	24.14	22.62	28.86	125.06	42.79	121.65	3.76	1.2	120.42	174.6	94.72	22.38	24.14	22.62	28.86	-5.13	-2.65	4.445	1.925
Mmu.6042.1.S1_at	Mmu.6042.1	CN648473		Mmu.6042.1	6.48	5.02	9.74	6.29	34.05	19.34	33.83	4.18	2.14	27.25	16.57	22.98	6.48	5.02	9.74	6.29	-3.2	-1.71	3.69	1.925
MmugDNA.18110.1.S1_at	MmugDNA.18110.1	gDNA.Hs.159633.0.A1		MmugDNA.18110.1	1	1	1.55	6.6	60.35	40.21	14.27	15.45	2.47	8.96	7.61	5.97	1	1	1.55	6.6	-3.07	-1.38	9.26	1.925
MmugDNA.34643.1.S1_at	LOC714309: hypothetical protein LOC714309	gDNA.Hs.85155.0.S1	714309	MmugDNA.34643.1	197.68	166	170.59	223.93	1043.53	298.26	1114.87	4.31	1.96	850.66	853.51	359.35	197.68	166	170.59	223.93	-3.56	-1.88	3.935	1.92
MmugDNA.11983.1.S1_s_at	LOC696878 /// LOC709958: similar to ATPase, H+ transporting, lysosomal 70kD, V1 subunit A, isoform 1	gDNA.g4502304	696878 /// 709958	MmugDNA.11983.1	93.19	90.04	74.71	134.67	354.79	313.65	625.35	4.32	1.94	340.37	294.32	267.93	93.19	90.04	74.71	134.67	-3.09	-1.9	3.705	1.92
MmugDNA.29168.1.S1_at	LOC719369: similar to Collagen alpha-1(III) chain precursor	gDNA.g4758671	719369	MmugDNA.29168.1	88.1	76.99	83.05	85.33	157.93	172.66	114.62	1.8	1.21	313.61	467.68	286.29	88.1	76.99	83.05	85.33	-4.18	-2.63	2.99	1.92
MmugDNA.9266.1.S1_at	LOC716161: similar to endothelial cell growth factor 1 (platelet-derived)	gDNA.g7669488	716161	MmugDNA.9266.1	87.55	81.16	62.06	105.69	290.93	211.05	230.06	2.91	2.22	155.73	177.31	185.24	87.55	81.16	62.06	105.69	-2.09	-1.62	2.5	1.92
MmugDNA.42106.1.S1_at	MmugDNA.42106.1	gDNA.Hs.4278.0.S2		MmugDNA.42106.1	43.9	21.86	33.41	38.48	193	301.55	91.17	5.67	1.4	248.56	266.68	131.65	43.9	21.86	33.41	38.48	-6.32	-2.43	5.995	1.915
Mmu.15848.1.S1_at	LOC707912: similar to transcription elongation regulator 1 isoform 1	CN645262	707912	Mmu.15848.1	88.26	117.28	110.59	124.44	247.96	263.33	431.3	2.85	1.71	526.67	297.66	309.58	88.26	117.28	110.59	124.44	-3.43	-2.11	3.14	1.91
MmugDNA.24819.1.S1_at	MmugDNA.24819.1	gDNA.Hs.12142.1.S1		MmugDNA.24819.1	75.9	87.79	91.72	94.93	363.04	137.24	460.03	3.76	1.68	328.12	325.65	313.76	75.9	87.79	91.72	94.93	-3.68	-2.14	3.72	1.91
MmuSTS.4811.1.S1_at	FYN: FYN oncogene related to SRC, FGR, YES	47776648	574214	MmuSTS.4811.1	691.89	925.21	1254.39	812.52	4017.78	2043.85	3905.77	3.63	2.34	1786.03	2269.19	1566.51	691.89	925.21	1254.39	812.52	-2.05	-1.48	2.84	1.91
MmugDNA.26369.1.S1_s_at	LOC705680: similar to guanine nucleotide binding protein (G protein), q polypeptide	gDNA.g1181670	705680	MmugDNA.26369.1	6.12	16.71	14.29	16.94	62.02	146.14	50.36	6.78	2.3	45.98	36.19	45.59	6.12	16.71	14.29	16.94	-3.35	-1.5	5.065	1.9
MmugDNA.31103.1.S1_at	LOC716027: similar to DOM-3 homolog Z	gDNA.Hs.153299.1.S1	716027	MmugDNA.31103.1	7.65	10.05	12.31	14.87	57.4	39.49	23.99	3.62	1.39	42.65	51.51	47.96	7.65	10.05	12.31	14.87	-4.23	-2.4	3.925	1.895
Mmu.1612.1.S1_at	LOC712091: hypothetical protein LOC712091	CB551768	712091	Mmu.1612.1	52	70.12	75.86	69.45	314.94	269.68	225.57	4.16	2.3	201.35	140.25	191.79	52	70.12	75.86	69.45	-2.71	-1.49	3.435	1.895
MmugDNA.25945.1.S1_at	MmugDNA.25945.1	gDNA.Hs2.434268.1.S1		MmugDNA.25945.1	54.99	85.48	80.87	89.9	576.34	112	499.64	5.04	1.9	170.04	279.24	252.68	54.99	85.48	80.87	89.9	-2.96	-1.89	4	1.895
MmugDNA.21587.1.S1_at	MmugDNA.21587.1	gDNA.Hs.18861.0.A1		MmugDNA.21587.1	15.24	13.23	10.56	13.77	68.7	71.32	35.99	4.41	2.26	83.99	40.42	35.77	15.24	13.23	10.56	13.77	-3.89	-1.52	4.15	1.89
MmugDNA.34943.1.S1_at	LOC707009: similar to thyrotroph embryonic factor isoform 2	gDNA.g606796	707009	MmugDNA.34943.1	181.43	168.43	188.12	174.24	651.2	429.8	780.53	3.51	2.47	357.68	659.53	384.42	181.43	168.43	188.12	174.24	-2.59	-1.31	3.05	1.89
MmugDNA.31045.1.S1_at	Solute carrier family 4, anion exchanger, member 2 (erythrocyte membrane protein band 3-like 1)	gDNA.Hs.17901.0.S2		MmugDNA.31045.1	4.61	3.41	6.68	6.54	34.55	37.76	12.4	5.43	1.93	40.41	32.44	16	4.61	3.41	6.68	6.54	-5.58	-1.84	5.505	1.885
MmugDNA.17877.1.S1_s_at	MmugDNA.17877.1	gDNA.g12275908		MmugDNA.17877.1	58.22	64.55	82.93	82.16	467.09	214.25	276.02	4.49	2.57	116.07	145.33	175.91	58.22	64.55	82.93	82.16	-2.03	-1.2	3.26	1.885
MmugDNA.12958.1.S1_at	MmugDNA.12958.1	gDNA.Hs.31709.0.A1		MmugDNA.12958.1	107.85	82.76	92.36	89.64	298.63	188.05	219.65	2.49	1.64	265.7	289.29	257.22	107.85	82.76	92.36	89.64	-2.91	-2.13	2.7	1.885
MmugDNA.15946.1.S1_at	MmugDNA.15946.1	gDNA.Hs.152940.0.A1		MmugDNA.15946.1	2.36	9.91	3	3.65	24.91	6.72	25.6	4.49	1.35	22.13	18.24	23.64	2.36	9.91	3	3.65	-4.98	-2.4	4.735	1.875
NC-003401.CDS44.S1_at	NC-003401.CDS44			NC-003401.CDS44	1.42	3.33	2.38	4.02	8.21	24.92	24.17	7.23	2.33	11.93	9.42	5.6	1.42	3.33	2.38	4.02	-3.4	-1.41	5.315	1.87
MmugDNA.21330.1.S1_at	LOC712272: similar to fibronectin type 3 and SPRY domain-containing protein	gDNA.Hs.136901.0.A1	712272	MmugDNA.21330.1	3.58	5.96	4.55	3.77	41.8	11.51	22.09	5.62	1.58	29.22	16.97	25.18	3.58	5.96	4.55	3.77	-5.44	-2.15	5.53	1.865
MmuSTS.2789.1.S1_at	LOC696561: similar to Kinesin-like protein KIF2	60301285	696561	MmuSTS.2789.1	83.52	97.8	150.69	134.73	1022.76	166.99	985.82	6.41	2.19	345.05	248.86	325.83	83.52	97.8	150.69	134.73	-2.66	-1.54	4.535	1.865
MmugDNA.21819.1.S1_at	LOC708246: similar to zinc finger protein 641	gDNA.Hs.50600.0.A1	708246	MmugDNA.21819.1	18.75	32.99	23.9	26.08	77.21	77.94	97.53	3.33	2.44	36.03	58.98	44.69	18.75	32.99	23.9	26.08	-1.82	-1.28	2.575	1.86
MmunewRS.223.1.S1_at	LOC722462: similar to leucine rich repeat containing 10	37545084	722462	MmunewRS.223.1	63.26	46.48	50.62	57.86	170.95	177.8	162.23	3.2	2.1	105.4	134.77	141.49	63.26	46.48	50.62	57.86	-2.34	-1.6	2.77	1.85
MmugDNA.26948.1.S1_s_at	LOC718651: similar to microfilament and actin filament cross-linker protein isoform a	gDNA.Hs.321395.0.S1	718651	MmugDNA.26948.1	127.04	101.3	95.13	117.13	363.74	201.3	321.84	2.66	1.66	323.14	354.25	277.31	127.04	101.3	95.13	117.13	-2.82	-2.03	2.74	1.845
MmugDNA.35093.1.S1_at	LOC700028: similar to CG33774-PA	gDNA.Hs.16420.1.S1	700028	MmugDNA.35093.1	1301.87	1244.76	874.83	1381.66	3473.91	1583.98	2712.94	2.17	1.36	3075.75	3631.04	3504.82	1301.87	1244.76	874.83	1381.66	-2.85	-2.32	2.51	1.84
MmugDNA.4504.1.S1_at	FYN: FYN oncogene related to SRC, FGR, YES	gDNA.Hs.169370.3.A1	574214	MmugDNA.4504.1	156.21	259.52	331.65	239.02	924.27	369.91	794.71	2.88	1.58	733.75	872.2	756.09	156.21	259.52	331.65	239.02	-3.27	-2.09	3.075	1.835
MmugDNA.21035.1.S1_s_at	MINK1: misshapen/NIK-related kinase	gDNA.Hs.278295.1.A1	721582	MmugDNA.21035.1	100.22	214.77	210.17	121.65	792.28	472.99	425.15	3.61	2	451.11	397.26	365.9	100.22	214.77	210.17	121.65	-2.52	-1.67	3.065	1.835
Mmu.14181.1.S1_at	STRN3: nuclear autoantigen	CO579015	717081	Mmu.14181.1	228.54	229.06	161.81	298.46	2800.28	262.67	2450.71	8.05	1.99	633.26	589.1	510	228.54	229.06	161.81	298.46	-2.55	-1.68	5.3	1.835
MmugDNA.33535.1.S1_at	MmugDNA.33535.1	gDNA.Hs.57830.0.S1		MmugDNA.33535.1	10.53	9.16	4.76	8.75	27.9	29.27	69.41	5.04	2.03	25.77	21.51	19.72	10.53	9.16	4.76	8.75	-2.74	-1.63	3.89	1.83
MmugDNA.15715.1.S1_at	LOC716495: similar to HCLS1 associated protein X-1 isoform a	gDNA.g13435355	716495	MmugDNA.15715.1	337.48	424.27	348.88	454.06	862.13	724.29	681.1	1.95	1.28	1017.63	1632.89	1282.51	337.48	424.27	348.88	454.06	-3.37	-2.38	2.66	1.83
MmugDNA.43364.1.S1_at	LOC716540: similar to solute carrier family 16, member 7	gDNA.Hs.170504.0.A1	716540	MmugDNA.43364.1	2.93	3.73	3.95	5.22	18.95	9.2	11.94	3.53	1.59	13.13	15.78	30.02	2.93	3.73	3.95	5.22	-5.01	-2.06	4.27	1.825
MmugDNA.38317.1.S1_at	MmugDNA.38317.1	gDNA.Hs.11873.0.A1		MmugDNA.38317.1	17.03	14.09	7.45	13.76	302.72	5.06	187.94	12.45	1.4	98.13	92.26	51.51	17.03	14.09	7.45	13.76	-5.8	-2.23	9.125	1.815
MmuSTS.63.1.S1_at	HFE: hemochromatosis protein	51853819	696129	MmuSTS.63.1	23.62	14.41	20.21	19.06	74.75	152.14	65.39	5.03	2.3	57.62	50.1	49.66	23.62	14.41	20.21	19.06	-2.74	-1.32	3.885	1.81
MmugDNA.26281.1.S1_at	LOC694059: similar to NADPH oxidase organizer 1 isoform c	gDNA.Hs.191762.0.A1	694059	MmugDNA.26281.1	151.59	115.11	128.59	157.39	431.88	512.15	177.99	2.68	1.29	390.88	609.55	492.8	151.59	115.11	128.59	157.39	-3.59	-2.32	3.135	1.805
MmugDNA.9880.1.S1_at	MmugDNA.9880.1	gDNA.Hs2.382156.1.S1		MmugDNA.9880.1	2.27	1	1.44	1.17	8.83	12.31	2.85	5.43	1.76	7.91	5.72	4.14	2.27	1	1.44	1.17	-4	-1.85	4.715	1.805
MmugDNA.24203.1.S1_s_at	LOC714767: similar to epidermal growth factor receptor pathway substrate 15	gDNA.Hs.79095.0.S2	714767	MmugDNA.24203.1	41.97	59.19	45.49	38.42	116.56	93.52	146.67	2.67	1.76	116.4	137.52	143.94	41.97	59.19	45.49	38.42	-2.87	-1.84	2.77	1.8
MmugDNA.6898.1.S1_at	LOC704762: hypothetical protein LOC704762	gDNA.g12053054	704762	MmugDNA.6898.1	83.19	50.76	61.4	67.25	374.04	128.85	197.31	3.61	1.48	263.84	228.05	202.13	83.19	50.76	61.4	67.25	-3.55	-2.11	3.58	1.795
MmugDNA.37860.1.S1_at	MmugDNA.37860.1	gDNA.Hs2.80975.2.A1		MmugDNA.37860.1	17.66	13.36	14.21	15.37	74.15	141.23	46.99	5.66	2.35	32.82	20.8	27.81	17.66	13.36	14.21	15.37	-1.73	-1.24	3.695	1.795
MmugDNA.3077.1.S1_at	KRTAP10-2 /// KRTAP10-3 /// LOC711182 /// LOC711344 /// LOC711658 /// LOC711745: similar to Keratin-associated protein 10-3 (Keratin-associated protein 10.3) (High sulfur keratin-associated protein 10.3) (Keratin-associated protein 18-3) (Keratin-associated protein 18.3) /// similar to keratin associated protein 10-7 /// similar to keratin associated protein 10-10 /// similar to keratin associate…	gDNA.Hs2.58076.1.S1	711182 /// 711344 /// 711658 /// 711745 /// 711828 /// 711986	MmugDNA.3077.1	22.39	23.09	31.83	25	82.14	108.38	95.79	3.78	1.75	64.3	96.72	102.18	22.39	23.09	31.83	25	-3.53	-1.84	3.655	1.795
MmugDNA.9553.1.S1_at	MmugDNA.9553.1	gDNA.Hs.25253.1.S1		MmugDNA.9553.1	109.83	147.07	163.33	65.26	584.91	229.69	668.59	4.21	2.13	277.73	330.7	233.42	109.83	147.07	163.33	65.26	-2.39	-1.46	3.3	1.795
MmugDNA.24263.1.S1_at	LOC708347: similar to RAB5B, member RAS oncogene family	gDNA.g12006052	708347	MmugDNA.24263.1	205.89	390.23	342.6	303.79	1460.77	627.48	1584.29	4.02	2.28	561.68	621.73	476.08	205.89	390.23	342.6	303.79	-1.82	-1.3	2.92	1.79
MmugDNA.8549.1.S1_s_at	LOC717356: similar to G-protein signalling modulator 3 (AGS3-like, C. elegans)	gDNA.Hs.288316.2.S1	717356	MmugDNA.8549.1	20.72	24.6	18.02	25.22	118.33	98.18	57.86	4.15	2.26	34.78	52.81	45.8	20.72	24.6	18.02	25.22	-2.07	-1.31	3.11	1.785
MmugDNA.40739.1.S1_at	LOC704530: similar to Ubiquitin-conjugating enzyme E2 E3 (Ubiquitin-protein ligase E3) (Ubiquitin carrier protein E3) (Ubiquitin-conjugating enzyme E2-23 kDa) (UbcM2)	gDNA.g4586929	704530	MmugDNA.40739.1	560.43	1021.43	1175.42	727.78	2977.28	1529.02	2989.76	2.88	1.83	2038.06	1816.75	2125.85	560.43	1021.43	1175.42	727.78	-2.3	-1.74	2.59	1.785
MmugDNA.12344.1.S1_at	LOC698848: similar to dual-specificity tyrosine-(Y)-phosphorylation regulated kinase 1B isoform b	gDNA.Hs.249140.0.S1	698848	MmugDNA.12344.1	17.33	15.1	15.4	19.51	129.32	64.86	70.46	5.01	2.13	56.14	57.25	40.53	17.33	15.1	15.4	19.51	-3.05	-1.43	4.03	1.78
MmugDNA.39245.1.S1_at	MmugDNA.39245.1	gDNA.Hs.71592.0.S1		MmugDNA.39245.1	1.74	4.42	6.23	3.19	15.77	12.89	20.21	4.35	1.99	14.69	10.54	15.02	1.74	4.42	6.23	3.19	-3.55	-1.56	3.95	1.775
MmugDNA.6069.1.S1_at	MmugDNA.6069.1	gDNA.Hs.115472.0.S1		MmugDNA.6069.1	6.24	2.89	5.99	8.55	34.29	9.84	42.42	5.4	1.84	31.93	19.4	18.47	6.24	2.89	5.99	8.55	-4.2	-1.71	4.8	1.775
MmugDNA.34779.1.S1_at	MmugDNA.34779.1	gDNA.Hs.281943.0.A1		MmugDNA.34779.1	1.16	1.57	1	2.15	13.51	4.47	14.19	7.41	2.17	9.83	8.01	3.51	1.16	1.57	1	2.15	-4.81	-1.34	6.11	1.755
MmugDNA.42709.1.S1_at	LOC698528: similar to GCN1 general control of amino-acid synthesis 1-like 1	gDNA.Hs.75354.2.S1	698528	MmugDNA.42709.1	38.29	39.64	42.67	48.66	142.75	115.89	89.64	2.72	1.6	131.2	116.6	148.5	38.29	39.64	42.67	48.66	-3.1	-1.9	2.91	1.75
MmugDNA.23894.1.S1_at	LOC713926: similar to rhomboid, veinlet-like 3	gDNA.Hs.9800.1.A1	713926	MmugDNA.23894.1	2.77	7.77	2.29	4.51	23.19	14.72	13.86	4.23	1.87	19.5	13.89	16.42	2.77	7.77	2.29	4.51	-3.95	-1.62	4.09	1.745
MmugDNA.15290.1.S1_at	LOC719738: similar to CD84 antigen (leukocyte antigen)	gDNA.g6650111	719738	MmugDNA.15290.1	1	6.22	4.23	1.75	20.07	33.67	16.8	8.31	1.83	16.52	13.43	8.11	1	6.22	4.23	1.75	-4.26	-1.65	6.285	1.74
MmugDNA.5825.1.S1_at	MmugDNA.5825.1	gDNA.Hs.283401.0.A1		MmugDNA.5825.1	6.37	2.37	2.32	3.06	64.68	64.27	1	11.83	1.72	27.12	15.44	13.58	6.37	2.37	2.32	3.06	-5.17	-1.76	8.5	1.74
MmugDNA.18663.1.S1_at	MmugDNA.18663.1	gDNA.Hs.110373.0.S1		MmugDNA.18663.1	180.15	179.67	216.65	204.68	596.1	626.72	542.4	3.01	1.98	451.2	715.45	472.11	180.15	179.67	216.65	204.68	-2.77	-1.5	2.89	1.74
Mmu.16227.3.S1_at	LOC710532 /// LOC719366 /// LOC720554 /// LOC722243 /// LOC722256 /// LOC722697 /// LOC723091 /// LOC723237 /// LOC723769: similar to Carcinoembryonic antigen-related cell adhesion molecule 1 precursor (Biliary glycoprotein 1) (BGP-1) (Murine hepatitis virus receptor) (MHV-R) (Biliary glycoprotein D) /// similar to Pregnancy-specific beta-1-glycoprotein 2 precursor (PSBG-2) (Pregnancy-specific be…	CN641870	710532 /// 719366 /// 720554 /// 722243 /// 722256 /// 722697 /// 723091 /// 723237 /// 723769	Mmu.16227.3	5.46	1	1.91	6.15	25.81	25.62	13.52	6.06	2.03	11	6.69	14.4	5.46	1	1.91	6.15	-2.98	-1.45	4.52	1.74
MmugDNA.30341.1.S1_at	LOC715963: similar to acyl-Coenzyme A binding domain containing 4	gDNA.g13376028	715963	MmugDNA.30341.1	23.28	22.56	25.24	20.23	112.79	129.19	41.13	4.16	1.96	49.63	58.89	50.22	23.28	22.56	25.24	20.23	-2.32	-1.5	3.24	1.73
MmugDNA.19864.1.S1_at	MmugDNA.19864.1	gDNA.Hs2.17681.1.S1		MmugDNA.19864.1	4.05	3.65	8.94	2.85	81	19.51	29.61	8.8	2.05	24.27	44.24	15.12	4.05	3.65	8.94	2.85	-5.35	-1.41	7.075	1.73
MmugDNA.41135.1.S1_at	MmugDNA.41135.1	gDNA.Hs.78960.0.A1		MmugDNA.41135.1	1	5.05	4.71	8.14	45.41	29.42	8.16	6.64	1.99	20.57	8.68	18.38	1	5.05	4.71	8.14	-3.71	-1.47	5.175	1.73
MmugDNA.41356.1.S1_at	FOXP2: forkhead box P2	gDNA.Hs2.282787.1.S1	613237	MmugDNA.41356.1	10.71	16.18	9.72	9.34	108.09	13.36	94.54	6.22	1.93	24.88	23.04	39.72	10.71	16.18	9.72	9.34	-2.51	-1.52	4.365	1.725
MmugDNA.18377.1.S1_at	MmugDNA.18377.1	gDNA.Hs.265591.0.S1		MmugDNA.18377.1	1.79	1	2.18	2	7.21	8.61	27.22	8.69	1.96	3.99	5.59	5.34	1.79	1	2.18	2	-3.1	-1.47	5.895	1.715
MmugDNA.13739.1.S1_at	LOC696632: similar to sorting nexin 14 isoform b	gDNA.Hs.46801.2.S1	696632	MmugDNA.13739.1	214.62	247.29	329.97	194.14	728.05	594.11	619.28	2.66	1.97	473.26	640.41	453.3	214.62	247.29	329.97	194.14	-2.15	-1.46	2.405	1.715
MmugDNA.22615.1.S1_s_at	MmugDNA.22615.1	gDNA.Hs.158761.0.S1		MmugDNA.22615.1	34.53	43.39	30.16	35.99	37.33	156.26	201.48	3.68	1.25	103.65	102.18	127.44	34.53	43.39	30.16	35.99	-3.08	-2.17	3.38	1.71
MmugDNA.21869.1.S1_at	KIF22: kinesin family member 22	gDNA.Hs.119324.1.S1	706401	MmugDNA.21869.1	33.31	29.79	37.91	38.15	153.18	79.68	114.17	3.3	1.48	84.54	209.16	211.48	33.31	29.79	37.91	38.15	-4.73	-1.94	4.015	1.71
MmugDNA.26209.1.S1_at	LOC710201: similar to polyhomeotic 2-like isoform a	gDNA.g4758241	710201	MmugDNA.26209.1	201.05	404.59	433.19	280.85	1353.82	771.28	1027.42	3.32	1.87	1132.97	935.11	823.88	201.05	404.59	433.19	280.85	-3.04	-1.54	3.18	1.705
MmugDNA.6007.1.S1_at	FSCN3: fascin 3	gDNA.g9966790	698236	MmugDNA.6007.1	3.63	2.06	4.7	5.95	12.38	19.76	17.6	4.19	2.04	13.88	10.4	8.47	3.63	2.06	4.7	5.95	-2.83	-1.36	3.51	1.7
MmuSTS.159.1.S1_at	LOC709521: similar to microfibrillar-associated protein 4	59676318	709521	MmuSTS.159.1	30.53	35	36.24	29.01	176.37	57.48	128.46	3.63	1.5	122.39	226.63	97	30.53	35	36.24	29.01	-4.42	-1.9	4.025	1.7
MmugDNA.7325.1.S1_at	LOC705127: similar to pseudouridylate synthase-like 1	gDNA.Hs.6449.2.A1	705127	MmugDNA.7325.1	39.71	38.64	44.32	46.21	177.53	331.89	116.68	4.92	2.04	88.3	122.92	127.69	39.71	38.64	44.32	46.21	-2.63	-1.35	3.775	1.695
MmugDNA.19422.1.S1_s_at	ADD1: adducin 1 (alpha)	gDNA.Hs.183706.2.S1	700805	MmugDNA.19422.1	130.84	134.58	107.15	95.17	325.39	388.5	305.21	2.88	1.91	253.35	259.23	302.7	130.84	134.58	107.15	95.17	-2.34	-1.48	2.61	1.695
MmugDNA.13908.1.S1_at	MmugDNA.13908.1	gDNA.Hs.26942.0.A1		MmugDNA.13908.1	8.92	14.44	8.68	5.81	51.65	126.71	35.09	7.82	1.81	53.31	36.13	28.82	8.92	14.44	8.68	5.81	-4.39	-1.58	6.105	1.695
MmugDNA.33891.1.S1_at	MmugDNA.33891.1	gDNA.Hs2.375819.1.S1		MmugDNA.33891.1	5.34	2.39	3.49	3.69	21.12	14.47	23.64	5.65	2.06	12.34	12.92	11.55	5.34	2.39	3.49	3.69	-3.44	-1.33	4.545	1.695
MmugDNA.41300.1.S1_at	MmugDNA.41300.1	gDNA.Hs2.156730.1.S1		MmugDNA.41300.1	1	1.29	1.34	1.09	7.76	3.92	4.23	4.71	2.02	3.74	2.03	5.52	1	1.29	1.34	1.09	-3.21	-1.37	3.96	1.695
MmunewRS.992.1.S1_at	LOC697278: similar to neurogenesin 1	38348413	697278	MmunewRS.992.1	4.05	1.94	3.57	3.1	7.59	9.65	7.97	2.66	1.33	15.27	13.85	9.26	4.05	1.94	3.57	3.1	-4.24	-2.06	3.45	1.695
MmugDNA.38888.1.S1_at	CAB39: calcium binding protein 39	gDNA.g4929600	711166	MmugDNA.38888.1	64.31	47.47	48.96	44.7	244.78	52.02	318.35	4.07	1.25	331.98	165.43	257.24	64.31	47.47	48.96	44.7	-4.82	-2.13	4.445	1.69
MmugDNA.12669.1.S1_at	LOC717510: similar to CG9186-PB, isoform B	gDNA.Hs.63300.1.S1	717510	MmugDNA.12669.1	3.69	8.39	11.25	10.16	30.57	36.59	21.69	3.52	1.94	33.91	28.21	13.51	3.69	8.39	11.25	10.16	-2.99	-1.44	3.255	1.69
MmugDNA.1090.1.S1_at	LOC717392: similar to natural killer-tumor recognition sequence isoform a	gDNA.Hs.206259.0.S1	717392	MmugDNA.1090.1	137.03	175.51	136.23	147.89	905.33	437.28	629.31	4.28	2.02	362.55	638.02	385.09	137.03	175.51	136.23	147.89	-3.03	-1.36	3.655	1.69
MmugDNA.25512.1.S1_at	LOC707995: similar to CG11164-PA	gDNA.Hs.14920.1.S1	707995	MmugDNA.25512.1	9.25	11.22	5.42	7.39	23.43	28.55	16.63	2.78	1.29	37.51	50.31	82.17	9.25	11.22	5.42	7.39	-6.72	-2.08	4.75	1.685
MmugDNA.42851.1.S1_at	LOC701755: similar to lysophospholipase	gDNA.Hs2.146239.1.S1	701755	MmugDNA.42851.1	15.97	11.2	13.83	16.47	50.17	48.92	61.37	3.76	1.92	45.85	38.92	50.72	15.97	11.2	13.83	16.47	-3.07	-1.45	3.415	1.685
MmugDNA.11392.1.S1_at	MmugDNA.11392.1	gDNA.Hs.113272.1.A1		MmugDNA.11392.1	6.26	2.18	1	3.81	8.62	11.41	10.16	3.27	1.24	10.57	15.81	24.01	6.26	2.18	1	3.81	-5.49	-2.13	4.38	1.685
MmugDNA.20975.1.S1_at	MmugDNA.20975.1	gDNA.Hs.279518.1.A1		MmugDNA.20975.1	35.54	39.76	45.82	31.75	151.28	132.19	80.06	3.15	1.95	64.09	97.98	80.7	35.54	39.76	45.82	31.75	-2.12	-1.42	2.635	1.685
MmugDNA.29846.1.S1_at	FH: fumarate hydratase	gDNA.Hs.75653.0.A1	707542	MmugDNA.29846.1	146.17	153.5	147.06	162.01	304.79	475.48	310.65	2.37	1.56	348.51	450.42	480.86	146.17	153.5	147.06	162.01	-2.75	-1.81	2.56	1.685
MmurRNA.1.1.S1_at	MmurRNA.1.1	AFFX-HS-5-8SrRNA		MmurRNA.1.1	1043.8	1567.74	1402.3	1003.63	4950.44	2519.54	5921.86	3.53	2.03	2543.35	4221.18	1987.33	1043.8	1567.74	1402.3	1003.63	-2.33	-1.34	2.93	1.685
MmuSTS.4265.1.S1_at	LOC706665: similar to glypican 4	59676223	706665	MmuSTS.4265.1	30.15	79.03	62.16	35.98	282.83	57.2	473.18	5.47	1.29	173.58	214.9	220.16	30.15	79.03	62.16	35.98	-4.09	-2.07	4.78	1.68
MmugDNA.5655.1.S1_at	LOC718948: similar to BCL2-associated X protein isoform alpha	gDNA.g4757837	718948	MmugDNA.5655.1	28.83	20.93	21.13	28.01	142	206.51	52.49	5.13	1.75	149.21	69.05	95.47	28.83	20.93	21.13	28.01	-3.92	-1.61	4.525	1.68
NC-006146.CDS44.S1_at	NC-006146.CDS44			NC-006146.CDS44	6.98	28.02	22.56	11.09	73.56	257.42	72.8	8.07	1.59	47.75	67.26	45.42	6.98	28.02	22.56	11.09	-3.22	-1.76	5.645	1.675
MmuSTS.1707.1.S1_at	MmuSTS.1707.1	55774057		MmuSTS.1707.1	160.24	133.9	103.37	166.94	258.21	299.06	288.04	2.05	1.52	287.67	607.46	395.09	160.24	133.9	103.37	166.94	-3.15	-1.83	2.6	1.675
MmugDNA.38837.1.S1_at	RBPMS: similar to RNA-binding protein with multiple splicing (RBP-MS)	gDNA.g1669550	694363	MmugDNA.38837.1	246.91	321.37	443.56	338.35	902.91	716.03	1360.75	3	1.78	790.38	1086.94	867.23	246.91	321.37	443.56	338.35	-2.76	-1.57	2.88	1.675
MmugDNA.26583.1.S1_at	MmugDNA.26583.1	gDNA.Hs.209806.0.S1		MmugDNA.26583.1	3.72	4.07	3.45	8.4	66.74	46.23	8.9	10	2.01	13.59	19.7	19.67	3.72	4.07	3.45	8.4	-3.96	-1.33	6.98	1.67
MmugDNA.30589.1.S1_at	MmugDNA.30589.1	gDNA.Hs.198182.0.S1		MmugDNA.30589.1	92.3	71.94	61.45	58.61	423.54	137.54	326.9	4.29	2.1	143.67	135.02	124.15	92.3	71.94	61.45	58.61	-1.96	-1.22	3.125	1.66
MmugDNA.35837.1.S1_at	LOC703967: similar to RAP guanine-nucleotide-exchange factor 3	gDNA.g4079648	703967	MmugDNA.35837.1	5.21	4.89	4.4	5.42	18.47	68.52	50.36	8.58	1.98	8.7	15.19	16.4	5.21	4.89	4.4	5.42	-2.71	-1.33	5.645	1.655
MmugDNA.8472.1.S1_at	LOC717435: similar to CG9063-PA	gDNA.g12053254	717435	MmugDNA.8472.1	4.42	8.74	11.38	8.97	33.01	22.91	24.44	3.39	1.22	36.34	25.09	44.51	4.42	8.74	11.38	8.97	-4.36	-2.09	3.875	1.655
MmugDNA.36530.1.S1_at	MmugDNA.36530.1	gDNA.Hs.293418.0.A1		MmugDNA.36530.1	1	5.56	2.65	3.26	9.6	15.04	29.02	6.81	2.07	11.91	8.21	11.67	1	5.56	2.65	3.26	-4.02	-1.24	5.415	1.655
MmugDNA.29542.1.S1_at	MmugDNA.29542.1	gDNA.Hs.237847.0.A1		MmugDNA.29542.1	41.98	33.19	33.16	31.27	179.48	68.64	287.54	5.15	1.88	141.2	71.9	102.29	41.98	33.19	33.16	31.27	-2.93	-1.42	4.04	1.65
MmugDNA.20475.1.S1_at	LOC722401: similar to K11G12.6	gDNA.Hs.58362.0.S1	722401	MmugDNA.20475.1	63.82	49.08	55.47	71.99	115.33	300.25	134.5	3.04	1.25	171.08	253.8	168.81	63.82	49.08	55.47	71.99	-3.29	-2.04	3.165	1.645
MmugDNA.12598.1.S1_at	LOC700463: similar to mitochondrial glutamate carrier 1	gDNA.g13375982	700463	MmugDNA.12598.1	39.55	80.49	114.97	64.18	331.21	149.36	293.3	3.73	1.67	246.1	231.23	227.56	39.55	80.49	114.97	64.18	-3.4	-1.62	3.565	1.645
Mmu.7225.1.S1_at	LOC694645: similar to potassium channel modulatory factor 1	CO726764	694645	Mmu.7225.1	261.34	460.93	484.51	360.89	2467.06	630.21	2028.6	4.45	2.02	868.55	611.8	776.58	261.34	460.93	484.51	360.89	-1.92	-1.26	3.185	1.64
MmugDNA.2816.1.S1_at	LOC713680: similar to Protein C9orf7	gDNA.g8922115	713680	MmugDNA.2816.1	21.3	12.98	8.94	5.15	328.73	34.81	137.42	14.43	2.04	32.99	25.14	29	21.3	12.98	8.94	5.15	-2.55	-1.23	8.49	1.635
MmugDNA.17033.1.S1_at	LOC712357: similar to RIKEN cDNA 9630046K23	gDNA.g9910427	712357	MmugDNA.17033.1	65.95	71.27	103.18	78.09	367.18	142.62	341.41	3.54	1.82	187.07	188.73	202.54	65.95	71.27	103.18	78.09	-2.45	-1.43	2.995	1.625
MmugDNA.7272.1.S1_at	LOC697279: similar to T-cell receptor beta chain V region 86T1 precursor	gDNA.Hs.120055.0.A1	697279	MmugDNA.7272.1	5.85	5.53	1	1.62	23.75	5.43	16.83	4.57	1.66	9.89	12.75	8.58	5.85	5.53	1	1.62	-3.05	-1.59	3.81	1.625
MmuSTS.2301.1.S1_at	LOC707005 /// LOC707704: similar to coiled coil domain containing 28B /// similar to taxilin	60301197	707005 /// 707704	MmuSTS.2301.1	49.02	53.43	33.92	56.07	163.04	180.69	126.76	3.32	1.77	137.48	124.78	134	49.02	53.43	33.92	56.07	-2.81	-1.48	3.065	1.625
MmuSTS.2430.1.S1_at	MmuSTS.2430.1	49533225		MmuSTS.2430.1	5.77	4.67	1.71	4.77	19.18	9.42	14.8	3.61	1.42	17.33	12.05	16.8	5.77	4.67	1.71	4.77	-3.72	-1.82	3.665	1.62
Mmu.5133.1.S1_at	Mmu.5133.1	CD766930		Mmu.5133.1	3.31	12	7.06	3.15	60.1	22.35	25.9	5.3	1.73	46.1	17.85	21.62	3.31	12	7.06	3.15	-4.23	-1.51	4.765	1.62
MmugDNA.1874.1.S1_s_at	SAR1B: similar to SAR1a gene homolog 2	gDNA.Hs2.279582.2.S1	711269	MmugDNA.1874.1	127.21	64.28	84.55	155.42	316.48	195.93	587.63	3.6	1.53	301.02	273.52	417.64	127.21	64.28	84.55	155.42	-3.15	-1.7	3.375	1.615
MmugDNA.25485.1.S1_at	LOC710862: similar to ubiquitin-conjugating enzyme E2G 2	gDNA.Hs.192853.0.A1	710862	MmugDNA.25485.1	103.8	96.74	75.24	106.79	211.15	224.24	349.35	2.7	1.46	311.64	256.51	323.5	103.8	96.74	75.24	106.79	-3.15	-1.76	2.925	1.61
MmugDNA.25630.1.S1_at	LOC705006 /// LOC722540: similar to mannosyl (alpha-1,3-)-glycoprotein beta-1,4-N-acetylglucosaminyltransferase, isoenzyme B isoform 1 /// similar to mannosyl (alpha-1,3-)-glycoprotein beta-1,4-N-acetylglucosaminyltransferase, isoenzyme B isoform 2	gDNA.g7710151	705006 /// 722540	MmugDNA.25630.1	103.55	164.75	175.76	130.41	336.16	376.68	340.58	2.48	1.73	300.71	340.02	292.86	103.55	164.75	175.76	130.41	-2.2	-1.48	2.34	1.605
MmugDNA.10979.1.S1_at	MmugDNA.10979.1	gDNA.g7662437		MmugDNA.10979.1	4.52	4.34	3.96	4.16	20.66	25.93	7.38	4.2	1.63	34.59	11.88	13.13	4.52	4.34	3.96	4.16	-4.65	-1.58	4.425	1.605
MmugDNA.28382.1.S1_s_at	LOC721653: similar to F-box and WD-40 domain protein 5	gDNA.g12654080	721653	MmugDNA.28382.1	248.5	204.57	183.85	263.02	473.22	419.7	404.39	1.94	1.38	521.08	717.9	516.72	248.5	204.57	183.85	263.02	-2.64	-1.83	2.29	1.605
MmugDNA.43129.1.S1_at	GART: phosphoribosylglycinamide formyltransferase, phosphoribosylglycinamide synthetase, phosphoribosylaminoimidazole synthetase	gDNA.Hs.82285.2.S1	704926	MmugDNA.43129.1	14.88	12.3	16.83	20.44	64.39	39.34	49.64	3.08	1.68	53.11	33.79	87.8	14.88	12.3	16.83	20.44	-3.47	-1.53	3.275	1.605
MmugDNA.24661.1.S1_at	MmugDNA.24661.1	gDNA.Hs2.382682.1.S1		MmugDNA.24661.1	14	15.78	11.74	18.77	37.05	39.18	46.84	2.77	1.73	27.62	99.38	52.52	14	15.78	11.74	18.77	-3.99	-1.47	3.38	1.6
MmugDNA.29987.1.S1_at	MmugDNA.29987.1	gDNA.Hs2.424388.1.A1		MmugDNA.29987.1	14.98	15.09	15.36	9.01	56.09	66.86	25.54	3.59	1.88	51.03	18.84	48.24	14.98	15.09	15.36	9.01	-2.81	-1.32	3.2	1.6
MmugDNA.10016.1.S1_at	IKBKE: IKK-related kinase epsilon	gDNA.Hs.321045.1.S1	695607	MmugDNA.10016.1	11.95	17.03	16.18	13.26	29.06	118.48	94.27	5.37	1.83	28.59	33.04	37.95	11.95	17.03	16.18	13.26	-2.28	-1.37	3.825	1.6
MmugDNA.8467.1.S1_at	MmugDNA.8467.1	gDNA.Hs2.278112.1.S1		MmugDNA.8467.1	5.04	1.6	3.36	3.62	26.18	15.14	14.48	5.78	1.57	14.08	14.84	10.89	5.04	1.6	3.36	3.62	-4.1	-1.63	4.94	1.6
MmugDNA.25018.1.S1_at	LOC697280: similar to butyrophilin, subfamily 3, member A3 isoform a	gDNA.g12803966	697280	MmugDNA.25018.1	3.1	6.5	4.39	3.46	12.44	13.35	12.52	3.12	1.82	11.21	9.88	19.51	3.1	6.5	4.39	3.46	-3.15	-1.37	3.135	1.595
MmuSTS.1018.1.S1_at	RUSC2: RUN and SH3 domain containing 2	59676426	697568	MmuSTS.1018.1	68.54	67.01	66.81	78.97	163.37	185.67	280.52	3.01	1.87	158.87	238.29	144.28	68.54	67.01	66.81	78.97	-2.52	-1.32	2.765	1.595
MmugDNA.40606.1.S1_at	MmugDNA.40606.1	gDNA.Hs.8881.0.A1		MmugDNA.40606.1	6.59	3.74	4.77	5.67	25.18	36.6	63.28	7.79	1.64	29.53	45.24	14.8	6.59	3.74	4.77	5.67	-5.41	-1.54	6.6	1.59
MmugDNA.38241.1.S1_at	MmugDNA.38241.1	gDNA.Hs2.390195.1.S1		MmugDNA.38241.1	2.45	6.41	6.22	4.21	17.57	25.33	14.44	3.97	1.87	14.3	11.68	14.01	2.45	6.41	6.22	4.21	-2.8	-1.31	3.385	1.59
MmugDNA.30178.1.S1_at	GADD45B: similar to Growth arrest and DNA-damage-inducible protein GADD45 beta (Negative growth-regulatory protein MyD118) (Myeloid differentiation primary response protein MyD118)	gDNA.g12061050	711257	MmugDNA.30178.1	676.6	360.96	876.36	860.02	2480.28	856.64	2620.06	2.86	1.46	1873.15	1504.95	1409.2	676.6	360.96	876.36	860.02	-2.3	-1.71	2.58	1.585
MmugDNA.41515.1.S1_s_at	MmugDNA.41515.1	gDNA.Hs.199068.0.S1		MmugDNA.41515.1	1	2.09	2.63	1.29	10.24	9.05	2.74	4.41	1.62	4.53	4.93	7.14	1	2.09	2.63	1.29	-3.37	-1.54	3.89	1.58
MmugDNA.42006.1.S1_at	LOC706628: similar to ecotropic viral integration site 5	gDNA.Hs.26870.0.A1	706628	MmugDNA.42006.1	44.45	51.82	58.11	53.4	67.03	176.21	139.97	2.5	1.22	141.01	150.48	148.37	44.45	51.82	58.11	53.4	-2.89	-1.93	2.695	1.575
MmugDNA.40984.1.S1_at	MmugDNA.40984.1	gDNA.Hs.23437.0.S1		MmugDNA.40984.1	7.95	6.31	4.53	7.01	19.96	10.9	29.74	3.17	1.37	165.77	64.88	57.3	7.95	6.31	4.53	7.01	-13.82	-1.77	8.495	1.57
MmugDNA.3134.1.S1_at	LOC710209: similar to F33H2.6	gDNA.Hs2.9905.3.S1	710209	MmugDNA.3134.1	9.17	6.71	6.67	16.12	66.69	20.73	53.97	5.39	1.42	51.17	32.39	68.27	9.17	6.71	6.67	16.12	-5.81	-1.71	5.6	1.565
MmugDNA.12002.1.S1_at	ATP6V1C1: ATPase, H+ transporting, lysosomal 42kDa, V1 subunit C1	gDNA.g4502314	693840	MmugDNA.12002.1	239.41	309.32	313.68	295.57	1605.27	351.46	1733.25	4.28	1.74	818.25	519.52	550.16	239.41	309.32	313.68	295.57	-2.16	-1.39	3.22	1.565
MmugDNA.34913.1.S1_at	MmugDNA.34913.1	gDNA.Hs2.376788.1.S1		MmugDNA.34913.1	24.09	15.05	17.01	17.21	76.37	54.77	72.55	3.81	1.91	27.67	72.79	54.29	24.09	15.05	17.01	17.21	-2.83	-1.21	3.32	1.56
Mmu.5468.1.S1_at	IRF3: interferon regulatory factor 3	CB555208	718970	Mmu.5468.1	110.24	82.5	65.48	80.55	343.31	138.47	371.29	3.46	1.84	194.73	269.95	212.9	110.24	82.5	65.48	80.55	-2.74	-1.28	3.1	1.56
MmugDNA.25675.1.S1_at	MmugDNA.25675.1	gDNA.Hs2.196379.1.S2		MmugDNA.25675.1	4.74	1.05	7.46	1.55	36.45	9.55	24.29	6.43	1.85	7.07	17.05	13.34	4.74	1.05	7.46	1.55	-3.62	-1.27	5.025	1.56
MmugDNA.38889.1.S1_at	DCXR: similar to L-xylulose reductase (XR) (Dicarbonyl/L-xylulose reductase) (Kidney dicarbonyl reductase) (kiDCR) (Carbonyl reductase II) (Sperm surface protein P34H)	gDNA.g7705924	715513	MmugDNA.38889.1	104.27	94.72	158.52	116.44	270.15	299.88	222.58	2.22	1.56	243.42	265.81	283.6	104.27	94.72	158.52	116.44	-2.25	-1.54	2.235	1.55
MmugDNA.4948.1.S1_at	MmugDNA.4948.1	gDNA.Hs.13431.0.S1		MmugDNA.4948.1	279.31	258.85	283.33	244.42	961.34	1641.09	482.63	3.85	1.66	544.41	577.67	555.85	279.31	258.85	283.33	244.42	-2.11	-1.44	2.98	1.55
MmugDNA.9406.1.S1_at	MmugDNA.9406.1	gDNA.Hs.101340.0.A1		MmugDNA.9406.1	6.02	3.66	7.58	3.12	35.05	14.5	15	4.03	1.6	22.79	21.7	8.73	6.02	3.66	7.58	3.12	-3.4	-1.47	3.715	1.535
MmugDNA.26102.1.S1_at	COPZ2: similar to Coatomer subunit zeta-2 (Zeta-2 coat protein) (Zeta-2 COP)	gDNA.Hs.96822.0.A1	696299	MmugDNA.26102.1	11.89	8.77	9.26	7.28	31.13	44.09	44.05	4.21	1.58	21.28	29.63	32.36	11.89	8.77	9.26	7.28	-3	-1.49	3.605	1.535
MmugDNA.4094.1.S1_at	LOC708871: similar to esterase D/formylglutathione hydrolase	gDNA.Hs.129960.0.A1	708871	MmugDNA.4094.1	44.88	45.34	43.64	54.69	92.36	153.24	102.27	2.38	1.24	119.41	152.51	154.92	44.88	45.34	43.64	54.69	-2.96	-1.82	2.67	1.53
MmugDNA.43452.1.S1_at	LOC695466: similar to scavenger receptor class F, member 2 isoform 2	gDNA.Hs.223918.0.A1	695466	MmugDNA.43452.1	25.27	15.92	16.13	12.55	88.85	37.55	66.62	3.7	1.82	34.65	40.94	52.35	25.27	15.92	16.13	12.55	-2.42	-1.23	3.06	1.525
MmuSTS.4507.1.S1_at	LOC698326: similar to glypican 1 precursor	55167532	698326	MmuSTS.4507.1	118.73	67.46	57.53	99.51	279.96	166	251.23	2.77	1.84	135.96	234.78	204.45	118.73	67.46	57.53	99.51	-2.16	-1.21	2.465	1.525
MmugDNA.31600.1.S1_at	SOCS1: similar to Suppressor of cytokine signaling 1 (SOCS-1) (JAK-binding protein) (JAB) (STAT-induced STAT inhibitor 1) (SSI-1) (Tec-interacting protein 3) (TIP-3)	gDNA.Hs.50640.0.A1	711180	MmugDNA.31600.1	88.74	108.62	101.88	86.77	530.11	146.27	333.83	3.48	1.52	193.98	480.86	238.71	88.74	108.62	101.88	86.77	-3.16	-1.51	3.32	1.515
MmugDNA.13964.1.S1_at	MmugDNA.13964.1	gDNA.Hs.250594.0.A1		MmugDNA.13964.1	3.83	5.54	5.11	6.64	34.75	6.09	33.59	4.85	1.32	45.22	80.9	32.71	3.83	5.54	5.11	6.64	-9.79	-1.7	7.32	1.51
MmugDNA.32006.1.S1_s_at	HNT: neurotrimin	gDNA.Hs.288433.2.A1	693345	MmugDNA.32006.1	157.38	172.05	147.71	152.3	461.48	195.52	463.79	2.4	1.45	448.13	482.26	412.24	157.38	172.05	147.71	152.3	-2.87	-1.57	2.635	1.51
MmugDNA.37304.1.S1_x_at	LOC711053 /// LOC718898 /// LOC722811 /// LOC723400: similar to pregnancy specific beta-1-glycoprotein 7 /// similar to pregnancy specific beta-1-glycoprotein 1 /// similar to Pregnancy-specific beta-1-glycoprotein 1 precursor (PSBG-1) (Pregnancy-specific beta-1 glycoprotein C/D) (PS-beta-C/D) (Fetal liver non-specific cross-reactive antigen 1/2) (FL-NCA-1/2) (PSG95) (CD66f antigen) /// similar t…	gDNA.g7524013	711053 /// 718898 /// 722811 /// 723400	MmugDNA.37304.1	23.44	25.71	20.75	24.47	92.57	150.09	57.65	4.09	1.65	51.83	80.99	46.14	23.44	25.71	20.75	24.47	-2.49	-1.37	3.29	1.51
NC-004455.CDS2.S1_at	NC-004455.CDS2			NC-004455.CDS2	1.41	1	1.96	1.3	23.3	38.8	16.88	17.89	1.7	5.31	7.75	10.14	1.41	1	1.96	1.3	-5.78	-1.31	11.835	1.505
MmugDNA.6371.1.S1_at	LOC704762: hypothetical protein LOC704762	gDNA.Hs.35380.0.S3	704762	MmugDNA.6371.1	182.74	90.69	121.29	69.74	924.6	98.03	924.02	5.53	1.42	493.73	426.36	361.39	182.74	90.69	121.29	69.74	-3.65	-1.58	4.59	1.5
MmugDNA.1581.1.S1_s_at	LOC719420 /// PFDN5: similar to prefoldin subunit 5 isoform gamma /// similar to prefoldin 5 isoform 1	gDNA.g4505742	702355 /// 719420	MmugDNA.1581.1	302.28	246.2	181.98	318.89	1186.48	374.72	1052.38	3.36	1.39	974.79	1001.88	620.54	302.28	246.2	181.98	318.89	-3.37	-1.61	3.365	1.5
MmugDNA.20802.1.S1_at	NUMA1: similar to nuclear mitotic apparatus protein 1	gDNA.g5453819	718231	MmugDNA.20802.1	151.23	149.12	145.45	123.38	315.26	428.91	241.07	2.29	1.36	361.24	341.25	312.68	151.23	149.12	145.45	123.38	-2.4	-1.64	2.345	1.5
MmugDNA.26783.1.S1_at	MmugDNA.26783.1	gDNA.Hs.126058.0.A1		MmugDNA.26783.1	7.25	6.31	11.7	7.27	91.62	26.61	30.25	6.32	1.72	22.71	16.47	12.77	7.25	6.31	11.7	7.27	-2.17	-1.26	4.245	1.49
Mmu.3820.1.S1_at	STAT5: signal transducer and activator of transcription 5A	AF227562.1	574129	Mmu.3820.1	6.4	7.61	6.39	8.79	26.08	19.72	22.94	3.07	1.43	23.66	23.51	15.06	6.4	7.61	6.39	8.79	-2.9	-1.55	2.985	1.49
MmugDNA.28891.1.S1_at	MmugDNA.28891.1	gDNA.Hs.324720.0.S1		MmugDNA.28891.1	5.42	2.23	9.6	3.32	13.88	18.87	26.26	4.13	1.55	17.35	10.27	16	5.42	2.23	9.6	3.32	-3.25	-1.43	3.69	1.49
Mmu.12449.1.S1_at	SDC1: similar to Syndecan-1 precursor (SYND1) (CD138 antigen)	CN804779	701544	Mmu.12449.1	78.73	59.39	66.71	59.29	165.92	124.21	251.21	2.68	1.47	132.97	190.64	329.08	78.73	59.39	66.71	59.29	-3.16	-1.48	2.92	1.475
MmugDNA.17511.1.S1_at	ZXDB: zinc finger, X-linked, duplicated B	gDNA.Hs.159249.1.A1	706216	MmugDNA.17511.1	3.74	1.81	5.8	4.55	7.34	25.91	12.27	4.11	1.34	12.01	10.24	11.51	3.74	1.81	5.8	4.55	-3.03	-1.6	3.57	1.47
MmugDNA.15724.1.S1_at	PKD2L2: polycystic kidney disease 2-like 2	gDNA.g7648680	713629	MmugDNA.15724.1	2.51	2.15	3.13	5.93	11.97	60.03	30.95	10.27	1.41	13.19	12.48	10.33	2.51	2.15	3.13	5.93	-3.81	-1.52	7.04	1.465
MmugDNA.10660.1.S1_at	LOC698169: similar to steroid receptor RNA activator 1	gDNA.Hs.32587.1.S1	698169	MmugDNA.10660.1	181.88	139.05	124.93	142.55	376.88	295.59	425.05	2.53	1.55	271.71	495.7	394.85	181.88	139.05	124.93	142.55	-2.65	-1.35	2.59	1.45
MmugDNA.32310.1.S1_at	LOC706662: hypothetical protein LOC706662	gDNA.Hs.120769.0.S1	706662	MmugDNA.32310.1	6.68	2.54	6.61	7.6	25.2	14.79	10.37	3.05	1.38	13.86	22.93	14.2	6.68	2.54	6.61	7.6	-3.04	-1.51	3.045	1.445
MmugDNA.15943.1.S1_at	LOC718306: similar to cleft lip and palate associated transmembrane protein 1	gDNA.g4502896	718306	MmugDNA.15943.1	222.26	268.8	254.19	230.65	556.59	485.39	970.42	2.75	1.57	494.64	592.54	433.99	222.26	268.8	254.19	230.65	-2.07	-1.32	2.41	1.445
MmugDNA.38611.1.S1_at	LOC693546: similar to MGC17624 protein	gDNA.Hs.40530.0.A1	693546	MmugDNA.38611.1	50.21	42.57	46.49	40.35	92.15	269.24	184.21	3.92	1.56	109.7	88.21	88.5	50.21	42.57	46.49	40.35	-2.1	-1.32	3.01	1.44
MmugDNA.23414.1.S1_at	LOC708634: similar to ion transporter protein	gDNA.Hs2.407511.1.S1	708634	MmugDNA.23414.1	53.7	61.25	34.37	74.49	150.83	98.71	139.32	2.31	1.65	80.54	88.73	102.03	53.7	61.25	34.37	74.49	-1.61	-1.23	1.96	1.44
MmuSTS.2004.1.S1_at	MmuSTS.2004.1	47776942		MmuSTS.2004.1	7.12	5.18	22.15	12.18	37.75	121.43	56.54	6.01	1.52	36.18	39.21	28.65	7.12	5.18	22.15	12.18	-2.96	-1.36	4.485	1.44
MmugDNA.30437.1.S1_at	LOC714785: similar to cytoplasmic nuclear factor of activated T-cells 4	gDNA.g4758801	714785	MmugDNA.30437.1	46.71	63.16	60.22	58.12	151.73	237.48	144.34	3.09	1.61	201.46	171.03	78.26	46.71	63.16	60.22	58.12	-2.55	-1.26	2.82	1.435
MmunewRS.47.1.S1_at	ARAF: v-raf murine sarcoma 3611 viral oncogene homolog	50485878	707169	MmunewRS.47.1	79.21	153.38	133.06	103.45	1123.02	244.17	450.72	5.17	1.46	252.18	221.87	182.25	79.21	153.38	133.06	103.45	-1.88	-1.41	3.525	1.435
MmugDNA.26977.1.S1_at	MmugDNA.26977.1	gDNA.Hs.296664.0.S1		MmugDNA.26977.1	5.7	2.85	3.79	6.38	17.7	43.87	20.35	5.87	1.64	12.31	10.63	15.08	5.7	2.85	3.79	6.38	-2.89	-1.22	4.38	1.43
MmugDNA.1227.1.S1_s_at	RIT1: similar to GTP-binding protein Rit1 (Ras-like protein expressed in many tissues) (Ras-like without CAAX protein 1)	gDNA.g4234917	717985	MmugDNA.1227.1	70.41	29.19	41.65	61.24	361.51	46.94	443.52	5.86	1.55	258.53	134.15	134.63	70.41	29.19	41.65	61.24	-3.47	-1.29	4.665	1.42
MmugDNA.30859.1.S1_at	MmugDNA.30859.1	gDNA.Hs.151608.0.S1		MmugDNA.30859.1	8.71	6.77	8.32	6.65	59.9	16.86	30.61	4.35	1.47	47.66	25.11	15.43	8.71	6.77	8.32	6.65	-3.57	-1.32	3.96	1.395
MmugDNA.6370.1.S1_at	LOC705413: similar to thrombospondin 1 precursor	gDNA.Hs.42699.0.A1	705413	MmugDNA.6370.1	40.97	36.27	50.04	38.6	361.99	40.15	381.1	6.23	1.47	236.62	221.13	105.86	40.97	36.27	50.04	38.6	-4.31	-1.32	5.27	1.395
MmugDNA.15917.1.S1_at	MIP: similar to Lens fiber major intrinsic protein (Aquaporin-0) (MIP26) (MP26)	gDNA.g6912505	712901	MmugDNA.15917.1	11.38	9.31	9.96	15.85	31.34	36.15	20.56	2.57	1.24	25.55	34.57	26.06	11.38	9.31	9.96	15.85	-2.57	-1.55	2.57	1.395
MmugDNA.15214.1.S1_s_at	SPRR1B: small proline-rich protein 1B	gDNA.Hs.211913.0.S1	613022	MmugDNA.15214.1	144.54	130	145.3	127.37	309.72	188.97	309.98	1.95	1.39	249.61	418.25	237.78	144.54	130	145.3	127.37	-2.19	-1.39	2.07	1.39
MmugDNA.9161.1.S1_at	MmugDNA.9161.1	gDNA.Hs.258886.0.A1		MmugDNA.9161.1	32.83	29.93	23.29	18.09	79.38	33.94	59.63	2.24	1.32	53.37	93.05	48.26	32.83	29.93	23.29	18.09	-2.49	-1.46	2.365	1.39
MmugDNA.24188.1.S1_s_at	LOC712082: similar to DPCD protein	gDNA.Hs.32990.0.S1	712082	MmugDNA.24188.1	167.73	241.45	152.12	229.08	508.24	249.79	492.95	2.16	1.3	397.04	484.62	589.18	167.73	241.45	152.12	229.08	-2.49	-1.48	2.325	1.39
MmugDNA.8140.1.S1_at	LOC706072: similar to syndesmos	gDNA.g13623246	706072	MmugDNA.8140.1	184.67	187.05	179.74	184.57	371.84	354.48	553.8	2.31	1.57	288.68	352.75	291.4	184.67	187.05	179.74	184.57	-1.73	-1.2	2.02	1.385
MmugDNA.22381.1.S1_at	LOC721838: hypothetical protein LOC721838	gDNA.Hs.129802.0.A1	721838	MmugDNA.22381.1	11.43	5.12	5.51	4.46	26.87	17	20.48	3.36	1.39	20.31	14.56	14.87	11.43	5.12	5.51	4.46	-2.55	-1.38	2.955	1.385
MmugDNA.9718.1.S1_at	LOC694027: hypothetical protein LOC694027	gDNA.Hs2.351485.1.S1	694027	MmugDNA.9718.1	120.84	111.24	122.2	100.81	235.13	316.53	213.3	2.17	1.49	198.72	274.36	189.38	120.84	111.24	122.2	100.81	-1.98	-1.28	2.075	1.385
MmugDNA.37529.1.S1_at	LOC713488: similar to pleckstrin homology domain containing, family H (with MyTH4 domain) member 2	gDNA.Hs.32241.0.A1	713488	MmugDNA.37529.1	17.33	9.6	9.14	9.11	25.69	23.28	30.29	2.37	1.42	19.59	28.41	24.33	17.33	9.6	9.14	9.11	-2.19	-1.34	2.28	1.38
MmugDNA.27192.1.S1_at	MmugDNA.27192.1	gDNA.Hs.87980.0.A1		MmugDNA.27192.1	46.9	19.41	35.35	42.94	102.41	56.52	154.38	2.85	1.37	137.06	98.47	77.19	46.9	19.41	35.35	42.94	-2.77	-1.38	2.81	1.375
MmugDNA.34622.1.S1_at	PARP9: B aggressive lymphoma gene	gDNA.g12751138	714856	MmugDNA.34622.1	22.28	14.79	15.22	12.7	57.17	61.24	32.38	3.07	1.52	44.64	39.49	33.94	22.28	14.79	15.22	12.7	-2.43	-1.23	2.75	1.375
MmugDNA.32702.1.S1_at	LOC696529: similar to G protein-coupled receptor 68	gDNA.Hs.8882.0.A1	696529	MmugDNA.32702.1	80.91	71	79.56	77.01	389.07	126.46	546.61	4.54	1.49	470.86	171.25	230.13	80.91	71	79.56	77.01	-3.54	-1.26	4.04	1.375
MmugDNA.34849.1.S1_at	MmugDNA.34849.1	gDNA.Hs.272563.0.S1		MmugDNA.34849.1	3.24	3.41	2.14	1.85	4.07	29.22	18.33	7.1	1.37	6.35	13.44	12.51	3.24	3.41	2.14	1.85	-4.21	-1.37	5.655	1.37
MmugDNA.2242.1.S1_s_at	LOC719074: similar to Acyl-protein thioesterase 2 (Lysophospholipase II) (LPL-I)	gDNA.Hs.283655.1.S1	719074	MmugDNA.2242.1	548.92	598.95	698.38	596.24	1280.83	820.65	1916.7	2.23	1.29	1301.26	1259.82	988.67	548.92	598.95	698.38	596.24	-1.95	-1.44	2.09	1.365
MmuSTS.1072.1.S1_at	MmuSTS.1072.1	55167708		MmuSTS.1072.1	2.74	7.69	1.09	1.28	155.35	15.05	50.24	23.46	1.38	12.4	15.55	14.7	2.74	7.69	1.09	1.28	-4.48	-1.35	13.97	1.365
MmuSTS.3266.1.S1_at	LOC698706: similar to NADH dehydrogenase (ubiquinone) 1 alpha subcomplex, 8, 19kDa	60301345	698706	MmuSTS.3266.1	646.51	1014.78	931.35	756.68	1834.87	1087.73	2287.58	2.08	1.27	1599.49	1562.74	1697.79	646.51	1014.78	931.35	756.68	-1.95	-1.45	2.015	1.36
MmugDNA.19459.1.S1_at	MmugDNA.19459.1	gDNA.Hs2.352748.1.A1		MmugDNA.19459.1	204.72	184.25	217.67	172.24	345.29	282.18	299.09	1.6	1.31	360.69	619.35	341.68	204.72	184.25	217.67	172.24	-2.23	-1.39	1.915	1.35
Mmu.13800.1.S1_at	LOC707820: similar to WNK lysine deficient protein kinase 4	CB310138	707820	Mmu.13800.1	86.23	108.41	91.34	111.06	196.8	208.84	277.46	2.33	1.23	398.86	320.33	313.16	86.23	108.41	91.34	111.06	-3.46	-1.46	2.895	1.345
MmuSTS.692.1.S1_at	CHM: choroideremia	62000111	694499	MmuSTS.692.1	2.33	3.05	6.25	5.32	23.25	48.07	8.88	6.61	1.2	21.93	12.91	16.26	2.33	3.05	6.25	5.32	-4.1	-1.48	5.355	1.34
MmugDNA.29663.1.S1_at	LOC699396: similar to IQ motif and Sec7 domain 2	gDNA.Hs.7483.0.A1	699396	MmugDNA.29663.1	216.74	194.98	207.35	164.69	393.5	264.03	386.06	1.85	1.41	308.97	645.78	343.29	216.74	194.98	207.35	164.69	-2.21	-1.27	2.03	1.34
Mmu.13692.1.S1_at	LOC693995: similar to aminopeptidase puromycin sensitive	CN642678	693995	Mmu.13692.1	149.32	186.91	266.11	155.24	963.79	223.18	809.34	3.63	1.38	564.02	475.11	431.65	149.32	186.91	266.11	155.24	-2.65	-1.3	3.14	1.34
MmugDNA.23185.1.S1_at	LOC696619: similar to TATA element modulatory factor 1	gDNA.Hs.324611.0.A1	696619	MmugDNA.23185.1	6.7	1.96	1	1.32	41.44	10.46	11.77	7.85	1.29	18.85	12.99	12.7	6.7	1.96	1	1.32	-5.46	-1.39	6.655	1.34
MmugDNA.37304.1.S1_at	LOC711053 /// LOC718898 /// LOC722811 /// LOC723400: similar to pregnancy specific beta-1-glycoprotein 7 /// similar to pregnancy specific beta-1-glycoprotein 1 /// similar to Pregnancy-specific beta-1-glycoprotein 1 precursor (PSBG-1) (Pregnancy-specific beta-1 glycoprotein C/D) (PS-beta-C/D) (Fetal liver non-specific cross-reactive antigen 1/2) (FL-NCA-1/2) (PSG95) (CD66f antigen) /// similar t…	gDNA.g7524013	711053 /// 718898 /// 722811 /// 723400	MmugDNA.37304.1	34.84	37.57	24.73	47.67	82.09	235.94	97.79	3.82	1.27	75.87	109.72	65.31	34.84	37.57	24.73	47.67	-2.32	-1.4	3.07	1.335
NC-006150.CDS206.S1_s_at	NC-006150.CDS206			NC-006150.CDS206	35.76	34.96	33.62	33.73	58.27	64.74	68.92	1.83	1.39	47.05	72.65	57.51	35.76	34.96	33.62	33.73	-1.7	-1.25	1.765	1.32
MmuSTS.3179.1.S1_at	LOC699530: similar to Beta-1,3-N-acetylglucosaminyltransferase manic fringe (O-fucosylpeptide 3-beta-N-acetylglucosaminyltransferase)	60301320	699530	MmuSTS.3179.1	3.87	2.32	3.9	5.12	57.34	1.63	36.97	8.76	1.24	9.69	14.87	9.48	3.87	2.32	3.9	5.12	-3.07	-1.39	5.915	1.315
MmugDNA.29871.1.S1_at	NDUFS2: NADH dehydrogenase (ubiquinone) Fe-S protein 2, 49kDa (NADH-coenzyme Q reductase)	gDNA.g4758785	719935	MmugDNA.29871.1	351.66	413.38	382.92	410.16	824.14	534.32	1242.56	2.22	1.3	640.64	733.59	665.73	351.66	413.38	382.92	410.16	-1.75	-1.32	1.985	1.31
MmugDNA.36424.1.S1_at	LOC721020: similar to CG16940-PA, isoform A	gDNA.Hs.132886.0.A1	721020	MmugDNA.36424.1	8.72	10.22	5.93	4.11	47.51	6.57	41.32	4.59	1.24	27.88	19.05	18.68	8.72	10.22	5.93	4.11	-3.13	-1.38	3.86	1.31
MmugDNA.50.1.S1_at	STK39: serine threonine kinase 39 (STE20/SPS1 homolog, yeast)	gDNA.g7019542	704855	MmugDNA.50.1	98.32	151.35	199.37	77.13	592.33	121.76	934.96	4.32	1.21	270.74	245.73	367.12	98.32	151.35	199.37	77.13	-2.29	-1.4	3.305	1.305
MmugDNA.19448.1.S1_at	MmugDNA.19448.1	gDNA.Hs.314643.0.A1		MmugDNA.19448.1	3.51	1.65	2.5	1.68	25.1	3.1	13.74	5.9	1.35	12.2	4.86	8.64	3.51	1.65	2.5	1.68	-3.6	-1.26	4.75	1.305
Mmu.10300.2.S1_at	PPP1R12A: protein phosphatase 1, regulatory (inhibitor) subunit 12A	CO645893	695735	Mmu.10300.2	176.48	180.6	210.5	186.33	443.98	259.89	345.83	1.85	1.29	406.57	399.53	346.69	176.48	180.6	210.5	186.33	-2.03	-1.32	1.94	1.305
MmugDNA.33276.1.S1_at	CUL7: cullin 7	gDNA.g7661893	699545	MmugDNA.33276.1	95.69	87.06	103.37	101.07	179.94	207.26	185.37	1.97	1.36	197.19	242.37	147.87	95.69	87.06	103.37	101.07	-1.99	-1.24	1.98	1.3
MmugDNA.7126.1.S1_at	MmugDNA.7126.1	gDNA.Hs.255096.0.A1		MmugDNA.7126.1	10.29	8.16	6.1	11.27	22.47	78.34	31.36	5.05	1.3	23.9	24.74	18.73	10.29	8.16	6.1	11.27	-2.6	-1.3	3.825	1.3
MmugDNA.18393.1.S1_at	LOC705080: similar to paraspeckle protein 1	gDNA.Hs.16364.1.S1	705080	MmugDNA.18393.1	443.29	572.39	690.87	513.27	1631.99	774.45	1236.47	2.18	1.28	945.03	1196.94	975.89	443.29	572.39	690.87	513.27	-1.88	-1.31	2.03	1.295
MmugDNA.31779.1.S1_at	MmugDNA.31779.1	gDNA.g8923692		MmugDNA.31779.1	50.1	45.86	47.83	51.45	82.19	104.56	98.51	1.92	1.2	84.4	138.58	114.94	50.1	45.86	47.83	51.45	-2.28	-1.37	2.1	1.285
MmugDNA.12478.1.S1_at	LOC693958: similar to pleckstrin homology domain containing, family C (with FERM domain) member 1	gDNA.g505032	693958	MmugDNA.12478.1	873.61	1415.15	1324.99	906.18	4119.44	1112.16	3964.85	2.75	1.26	2290.54	2448.37	1804.27	873.61	1415.15	1324.99	906.18	-1.96	-1.3	2.355	1.28
MmugDNA.34513.1.S1_at	KIAA2026: KIAA2026 protein	gDNA.Hs.258549.0.S1	717388	MmugDNA.34513.1	19.17	19.49	25.59	25.74	62.3	43.86	40.62	2.35	1.2	78.47	53.57	61.35	19.17	19.49	25.59	25.74	-2.96	-1.34	2.655	1.27
MmuSTS.596.1.S1_at	LOC720188: similar to Homeobox protein Hox-D9 (Hox-4.4) (Hox-5.2)	47776710	720188	MmuSTS.596.1	83.75	86.01	105.71	100.34	230.92	168.49	517.15	3.25	1.28	213.88	166.31	153.41	83.75	86.01	105.71	100.34	-1.87	-1.24	2.56	1.26
MmuSTS.4144.1.S1_at	MmuSTS.4144.1	47776599		MmuSTS.4144.1	188.69	194.04	172.02	165.2	248.53	387.83	382.77	1.84	1.2	316.89	346.37	285.66	188.69	194.04	172.02	165.2	-1.79	-1.32	1.815	1.26
MmuSTS.1107.1.S1_at	LOC719676: similar to peroxisomal biogenesis factor 19	51853984	719676	MmuSTS.1107.1	54.16	161.64	195.63	105.37	267.2	411.64	239.33	2.44	1.3	269.38	501.1	220.66	54.16	161.64	195.63	105.37	-2.67	-1.21	2.555	1.255
NC-006150.CDS31.S1_at	NC-006150.CDS31			NC-006150.CDS31	7.33	5.98	6.04	11.03	11.6	47.63	33.96	4.32	1.28	19.43	13.68	13.52	7.33	5.98	6.04	11.03	-2.2	-1.2	3.26	1.24
MmugDNA.33939.1.S1_at	LOC700918: similar to diaphanous 1	gDNA.Hs.26584.2.S1	700918	MmugDNA.33939.1	21.04	14.97	9.1	14.24	22.81	37.89	34.9	2.21	1.21	25.45	29.13	30.78	21.04	14.97	9.1	14.24	-1.99	-1.25	2.1	1.23
MmugDNA.9874.1.S1_at	LOC717679: similar to TPR domain, ankyrin-repeat and coiled-coil-containing	gDNA.Hs.4996.1.S1	717679	MmugDNA.9874.1	219.88	179.82	162.87	150.85	350.46	595.35	299.23	2.29	1.26	323.43	429.43	271.01	219.88	179.82	162.87	150.85	-1.9	-1.2	2.095	1.23
MmugDNA.25071.1.S1_at	RHBDL1: rhomboid, veinlet-like 1	gDNA.g4506524	722357	MmugDNA.25071.1	157.62	163.46	166.6	153.96	277.76	226.64	267.7	1.61	1.21	229.11	345.05	258.38	157.62	163.46	166.6	153.96	-1.72	-1.23	1.665	1.22
MmuSTS.2306.1.S1_at	LOC719929: similar to alpha isoform of regulatory subunit A, protein phosphatase 2	51854032	719929	MmuSTS.2306.1	710.86	772.09	633.79	713.18	1236.9	886.33	1399.54	1.68	1.22	1108.06	1142.8	1115.66	710.86	772.09	633.79	713.18	-1.6	-1.22	1.64	1.22
